1 **Endothelial cell signature in muscle stem cells showed by VEGFA-FLT1-AKT1 axis for**  
2 **muscle stem cell survival**

3

4 Authors/Affiliations

5 Mayank Verma<sup>a,b,c,d</sup>, Yoko Asakura<sup>b,c,d</sup>, Xuerui Wang<sup>b,c,d</sup>, Kasey Zhou<sup>b,c,d</sup>, Mahmut Ünverdi<sup>b,c,d</sup>,

6 Allison P. Kann<sup>e,f</sup>, Robert S. Kraus<sup>e,f</sup> and Atsushi Asakura<sup>b,c,d</sup>

7

8 Department of Pediatrics & Neurology, Division of Pediatric Neurology, The University of

9 Texas Southwestern Medical Center, TX, USA<sup>a</sup>.

10 Stem Cell Institute<sup>b</sup>, Paul & Sheila Wellstone Muscular Dystrophy Center<sup>c</sup>, Department of

11 Neurology<sup>d</sup>, University of Minnesota Medical School, MN, USA

12 Department of Cell, Developmental, and Regenerative Biology<sup>e</sup>, and Graduate School of

13 Biomedical Sciences<sup>f</sup>, Icahn School of Medicine at Mount Sinai, NY, USA.

14

15 Conflict of Interest

16 MV and AA are listed as inventors on a patent for anti-FLT1 antibody mediated therapy for

17 DMD. AA received consulting fees from ShireHGT.

18

19

20

21 **Abstract**

22 Endothelial and skeletal muscle lineages arise from common embryonic progenitors. Despite  
23 their shared developmental origin, adult endothelial cells (ECs) and muscle stem cells (MuSCs)  
24 (satellite cells) have been thought to possess distinct gene signatures and signaling pathways.  
25 Here we shift this paradigm by uncovering how adult MuSC behavior is affected by the  
26 expression of a subset of EC transcripts. We used several computational analyses including  
27 single-cell RNAseq to show that MuSCs express low levels of canonical EC markers. We  
28 demonstrate that MuSC survival is regulated by one such prototypic  
29 endothelial signaling pathway (VEGFA-FLT1). Using pharmacological and genetic gain- and  
30 loss-of-function studies, we identify the FLT1-AKT1 axis as the key effector underlying  
31 VEGFA-mediated regulation of MuSC survival. All together, our data support that the VEGFA-  
32 FLT1-AKT1 pathway promotes MuSC survival during muscle regeneration, and highlights how  
33 the minor expression of select transcripts is sufficient for affecting cell behavior.

34

35

## 36 **Introduction**

37 Skeletal muscle and endothelial cells (ECs) and their progenitors from the trunk and limbs are  
38 derived from the somites during early developments. Previous works demonstrated the existence  
39 of bipotent progenitors which express both Pax3 and FLK1 (Eichmann et al., 1993; Ema et al.,  
40 2006; Esner et al., 2006; Kardon et al., 2002; Tozer et al., 2007). These bipotent progenitors  
41 migrate into trunk and limb buds from ventrolateral region of the somites to generate MyoD(+)  
42 myogenic cells followed by skeletal muscle and PECAM1(+) ECs followed by vasculatures  
43 (Hutcheson and Kardon, 2009; Kardon et al., 2002; Lagha et al., 2009; Mayeuf-Louchart et al.,  
44 2016, 2014). In addition, FLK1(+) cells give rise to myogenic cells during development and  
45 oncologic transformation (Drummond and Hatley, 2018; Mayeuf-Louchart et al., 2014; Motoike  
46 et al., 2003). Lastly, multipotent mesoangioblasts, vessel-associated stem cells, have been  
47 identified in embryonic dorsal aorta (Minasi et al., 2002). These cells are able to differentiate  
48 into several types of mesodermal tissues including skeletal muscle and ECs (Roobrouck et al.,  
49 2011). Interestingly, these myogenic cells show the same morphology as muscle satellite cells  
50 (MuSCs), stem cell populations for skeletal muscle, and express a number of myogenic and EC  
51 markers such as MyoD, M-cadherin, FLK1 and VE-cadherin (De Angelis et al., 1999). However,  
52 it is not clear whether adult MuSCs derived from these bipotent progenitors still maintain  
53 canonical EC signals. Curiously, blood vessel-associated myoendothelial cell progenitors that  
54 express both myogenic and EC markers, and are able to differentiate into myogenic cells  
55 following transplantation have been identified in the interstitial spaces of both murine and human  
56 adult skeletal muscle (Tamaki et al., 2002; Zheng et al., 2007; Huang et al., 2014). However, the  
57 relationship between these myoendothelial cell progenitors and MuSCs remains unclear.

58

59           Vascular endothelial growth factor (VEGF), specifically VEGFA modulates many  
60 biological aspects including angiogenesis through its two receptors, FLT1 and FLK1. Although  
61 FLK1 possesses stronger signaling capability and the major signaling receptor tyrosine kinase  
62 (RTK) for VEGFA, FLT1 has considerably higher affinity for VEGF but weaker cytoplasmic  
63 signaling capability. In normal tissue, FLT1 acts as a decoy receptor and a sink trap for VEGF  
64 thereby preventing excessive normal and pathological angiogenesis. In addition, there are two  
65 co-receptors for VEGFA (NRP1 and NRP2) that function with FLK1 to modulate VEGFA  
66 signaling. While VEGF signaling has been extensively studied for its role in development,  
67 proliferation, and survival of endothelial cells (ECs), its role in non-vascular systems such as  
68 neuron and bone has only recently been appreciated (Liu et al., 2012; Okabe et al., 2014; Poesen  
69 et al., 2008). Skeletal muscle tissue is the most abundant producer of VEGFA in the body. It has  
70 already been extensively studied in the skeletal muscle fibers in models of *Vegfa* knockout mice  
71 (Olfert et al., 2009; Tang et al., 2004; Wagner et al., 2006) as well as *Vegfa* overexpression  
72 (Arsic et al., 2004; Bouchentouf et al., 2008; Messina et al., 2007; Yan et al., 2005).

73           Adult skeletal muscle also contains the tissue resident muscle stem cell population,  
74 termed MuSCs, which mediate postnatal muscle growth and muscle regeneration (Motohashi and  
75 Asakura, 2014). After muscle injury, quiescent MuSCs initiate proliferation to produce myogenic  
76 precursor cells, or myoblasts. The myoblasts undergo multiple rounds of cell division before  
77 terminal differentiation and formation of multinucleated myotubes by cell fusion. Importantly,  
78 the MuSC-derived myoblasts also express VEGFA, which has been shown to increase the  
79 proliferation of myoblasts (Christov et al., 2007). Our data obtained from genetical model mice  
80 demonstrated that MuSCs express abundant VEGFA, which recruits ECs to establish vascular  
81 niche for MuSC self-renewal and maintenance (Verma et al., 2018). In addition, VEGFA and its

82 receptors are expressed in the myoblast cell line, C2C12 cells, and the signaling can induce cell  
83 migration and protect apoptotic cell during myogenic differentiation *in vitro* (Bryan et al., 2008;  
84 Germani et al., 2003; Mercatelli et al., 2010). However, it is not clear whether MuSCs also  
85 express VEGF receptors and if cell-autonomous VEGFA signaling plays an essential roles in  
86 MuSC fuccion during muscle regeneration *in vivo*.

87 We have previously shown that *Flt1* heterozygous gene knockout and conditional  
88 deletion of *Flt1* in ECs display increased capillary density in skeletal muscle, indicating the  
89 essential roles for *Flt1* in adult skeletal muscle. More importantly, when crossed with the  
90 Duchenne muscular dystrophy (DMD) model *mdx* mice, these mice show both histological and  
91 functional improvements of their dystrophic phenotypes. This was due to the effect of increased  
92 ECs leading to an increase in MuSCs (Verma et al., 2010; Verma et al., 2019). However, the  
93 effect of VEGFA on MuSC *in vivo* remained unknown. We found that MuSCs express low levels  
94 of canonical EC markers including VEGF receptors using single cell transcriptomics. Therefore,  
95 we examined the effects of VEGFA on MuSCs and show that it has a drastic effect on cell  
96 survival in the via its receptor FLT1 by signaling through AKT1.

97

## 98 **Results**

### 99 **EC gene signal including *Vegf* receptors in MuSCs**

100 EC signatures in MuSCs has been seen in several gene expression data sets (Figure S1A-D,  
101 Table S1) (Fukada et al., 2007; Ryall et al., 2015; van Velthoven et al., 2017; Yue et al., 2020).  
102 However, with the lack of EC control, we questioned whether these were true expression or  
103 artifact. To isolate EC and MuSC populations, we first crossed the *Flk1*<sup>+/GFP</sup> mice to label the  
104 ECs of the vasculature (Ema et al., 2006) and the *Pax7*<sup>+/CreERT2</sup>:*ROSO26*<sup>+/Loxp-stop-Loxp-tdTomato</sup>

105 (*Pax7<sup>+/CreERT2</sup>:R26R<sup>+/tdT</sup>*) mice to mark the MuSC lineage (Murphy et al., 2011; Verma et al.,  
106 2018). We performed bulk RNA sequencing (RNAseq) on FACS sorted ECs and MuSCs as well  
107 as freshly isolated single muscle fibers (Figure 1A, S1E-G). We found that single muscle fibers  
108 routinely have ECs fragments attached to the fiber (Figure S1G) and so we removed such fibers  
109 based of Flk1<sup>GFP</sup> expression from the samples collected for sequencing. We surveyed for  
110 canonical genes for each cell type (Figure 1B) and found minimal but reliable expression of  
111 canonical ECs genes such as *Pecam1*, *Cdh5*, *Kdr*, and *Flt1* in MuSCs.

112         It is possible that these EC signatures detecting in MuSCs were not due to small amounts  
113 of contaminating ECs with very high expression of the canonical EC genes skewing the average  
114 expression in MuSC RNA samples. To rule out this possibility, we performed single cell  
115 RNAseq (scRNAseq) on MuSCs and ECs isolated from mouse hind limb muscle from both basal  
116 condition and 3-days post injury to look at both quiescent and activated MuSCs from the reporter  
117 mice specified above (Figure 1A). We could reliably delineate injured and activated MuSCs via  
118 side and forward scatter (Figure S1H, S1I). We FACS isolated cells from both days separately  
119 and spiked in 20% of the ECs into the MuSCs, and performed scRNAseq for each time point  
120 (Figure 1A). We performed sequencing with ~300K read/cell compared with the commonly used  
121 sequencing with 60K reads/cell, in order to maximize the possibility of detecting low abundance  
122 transcripts (Zhang et al., 2020). In the aggregated dataset, the MuSCs showed low overlap  
123 between D0 and D3 owing to the different stages of the myogenic differentiation cycle, while the  
124 ECs clusters showed near perfect overlap (Figure 1C, 1D). While drastic morphological changes  
125 in ECs have been shown during muscle regeneration (Hardy et al., 2016), transcriptomic changes  
126 are much more tapered, especially compared with MuSCs (Latroche et al., 2017). We were able  
127 to deconvolve the quiescent MuSCs from the activated and differentiating MuSCs, ECs, and

128 other cell types from gene signatures. (Figure S1J). We also introduced an artificial chromosome  
129 loci in our sequencing reference genome to allow for mapping of custom genes such as *eGFP-*  
130 *SV40* and *tdTomato-WPRE-BGHPolyA* transgenes and were able to confirm high expression of  
131 these genes to their respective clusters (Figure 1E). Importantly, data from scRNAseq were able  
132 to recapitulate the minimal expression of canonical EC genes in the MuSC clusters such as *Cdh5*  
133 (Figure 1E) as seen in our Bulk RNAseq results (Figure 1B). These included the *Vegf receptors*  
134 *Flk1* (*Kdr*) and *Flt1* (Figure 1E). As a quality control measure, we mapped parts of the three  
135 transgene genes, *eGFP* from *Flk1<sup>+GFP</sup>*, and *tdTomato* and *CreERT2* from *Pax7<sup>+CreERT2</sup>:R26R<sup>+tdT</sup>*  
136 that can be detected in ECs and MuSCs, respectively, as expected (Figure S1K).

137 Surprisingly, we also found *eGFP* in the MuSCs and *tdTomato* in EC fraction, while the  
138 *CreERT2* expression remained mainly restricted to the MuSCs (Figure S1K). FACS analysis and  
139 FACS-sorted cells confirmed that GFP(+) and tdTomato(+) cells are exclusively restricted as  
140 ECs and MuSCs, respectively (Figure S1E, S1F). Therefore, we hypothesized that this was due  
141 to the ambient free mRNA from the digested cells that is intrinsic to any droplet based single cell  
142 sequencing platform. By using SoupX (Young and Behjati, 2018), we performed careful  
143 background subtraction using genes expressed exclusively in myofibers as our negative control  
144 and genes validated by *in situ* hybridization as a positive control (Figure S1K) (Kann and Krauss,  
145 2019). We observed decreased but sustained *eGFP* expression in the MuSC fraction and  
146 *tdTomato* expression in the EC fraction after SoupX subtraction (Figure S1K). In addition, the  
147 EC signatures such as *Cdh5* expression in the MuSC fraction was also sustained. These results  
148 conclude that MuSCs contain mRNAs from canonical ECs genes. We showed that the canonical  
149 EC genes were broadly expressed in the myogenic cells in our dataset (Figure 1E).

150           Since detection of rare subpopulation in single cell dataset is a factor of cell numbers, we  
151 re-analyzed previously published dataset with 2,232 myogenic cells across different states (Torre  
152 et al., 2018; De Micheli et al., 2020). We were able to classify cell as quiescent, proliferative vs.  
153 differentiating states based on the expression of *Calcr*, *Cdk1* and *Myog*, respectively (Figure  
154 S1L). We noticed that EC prototypic markers such as *Flt1* are broadly expressed with small  
155 amounts in MuSCs. Complementary data from different laboratories showed the clear expression  
156 of EC prototypic markers such as *Cdh5*, *Flt1* and *Kdr*, using microarrays and Bulk-RNAseq  
157 (Figure S1A, S1B; Fukada et al., 2007; Ryall et al., 2015). Recently, RNAseq data from fixed  
158 quiescent, early activated and late activated MuSCs show that *Flt1* may be transiently  
159 upregulated during the early activation process (Figure S1C) (Yue et al., 2020). To confirm  
160 whether the EC gene mRNAs were transcribed from MuSCs, we utilized previously published  
161 MuSC nascent RNA transcriptome from TU-tagged samples (Gay et al., 2013; van Velthoven et  
162 al., 2017). As expected, *Myh1* was represented in the whole muscle but was absent in the TU-  
163 tagged MuSCs (Figure 1F), indicating that the nascent MuSCs were devoid of cellular  
164 contamination from other cells in the muscle. Inversely, the nascent MuSC transcript was over-  
165 represented for MuSC related genes such as *Calcr* and *Sdc4*. Interestingly, we were able to detect  
166 EC genes such as *Kdr* and *Pecam1* in the TU-tagged MuSC samples indicating that they were  
167 actively transcribed by MuSCs (Figures 1F, S1D).

168           We also verified the expression of *Vegfr* genes (*Kdr*, *Flt1*, *Nrp1* and *Nrp2*) in MuSCs  
169 using RT-qPCR (Figure 1G). In addition, we verified the expression of *Flt1* by performing *in-*  
170 *situ* hybridization using RNAScope on MuSC on whole muscle fiber, which we currently believe  
171 to be the gold standard for expression studies (Figure 1H). Finally, in MuSC-derived myoblasts,  
172 NRP1and NRP2 expression was detectable with comparable intensity compared with EC cell



173 line, while FLT1 expression was detectable with lower intensity compared with EC cell line  
174 (Figure 1I). By contrast, PECAM1, VE-Cadherin and FLK1 expression, which was clearly  
175 detected in EC cell line, was undetectable level in myoblasts. Taken together, these data indicate  
176 that there are both transcripts of these EC canonical genes and EC canonical proteins in MuSCs.

177

### 178 **VEGFA induces proliferation and cell survival but not differentiation in myoblasts**

179 Since VEGFRs were expressed in MuSCs in small amounts and their ligand, VEGFA, was  
180 highly expressed in MuSCs (Figure 2A; Verma et al., 2018), we wanted to investigate whether  
181 there were any biological effects to induction by VEGFA. We found that treatment with VEGFA  
182 could increase proliferation of MuSC-derived myoblasts at low dose but inhibit proliferation at  
183 high dose of VEGFA, a phenomenon that has been previously described in ECs (Noren et al.,  
184 2016)) (Figure S2A). We saw no effect on differentiation by VEGFA as evaluated by myosin  
185 heavy chain (MyHC) staining, fusion index and RT-qPCR (Figure S2B, S2C, S2D). By contrast,  
186 crystal violet staining showed that VEGFA could significantly increase survived cell number of  
187 myoblasts following UV-mediated apoptotic cell death induction (Figure S2E, S2F). To  
188 investigate apoptosis in detail, we optimized Annexin V assay following thapsigargin-mediated  
189 endoplasmic reticulum (ER)-stress (Hirai et al., 2010) so that we could study deviation at ~ED50  
190 while still performing experiments to remove the confounding variable to proliferation from the  
191 experimental setup (Figure S2G and S2H). We had previously shown that MuSCs are the  
192 predominant cells that secrete VEGFA in skeletal muscle (Figure 2A; Verma et al., 2018) and  
193 while adding exogenous VEGFA did not improve cell survival, blocking VEGFA via a soluble  
194 form of FLT1-FC increased the number of apoptotic and necrotic myoblasts *in vitro* (Figure 2C-  
195 E).

196

197 **VEGFA-facilitated cell survival in MuSC-derived myoblasts is mediated through FLT1**

198 To characterize the VEGF receptor responsible for the anti-apoptotic effect of VEGFA on  
199 MuSC-derived myoblasts, we used pharmacological inhibitors of the VEGF receptors (Figure  
200 2F). We used blocking antibody for the VEGF receptors FLT1 (anti-FLT1 antibody), small  
201 molecule inhibitors for FLK1 (SU4502 and ZM306416) and the FLK1 co-receptor NRP1  
202 (EG00229) (Figure 2D). Surprisingly, inhibiting FLK1, the major signaling RTK for VEGFA,  
203 had no effect on myoblasts survival (Figure 3E). By contrast, blocking FLT1 via blocking  
204 antibody greatly decreased the survival of myoblasts following thapsigargin induction (Figure  
205 3E). To confirm this interesting result using genetic tools, we obtained myoblasts with *Pax7*-  
206 *CreER*-inducible deletion of *Flt1* mice (*Pax7<sup>+/+</sup>CreER:Flt1<sup>Loxp/Loxp</sup>* or *MuSC-Flt1<sup>Δ/Δ</sup>*) and the control  
207 mice (*Pax7<sup>+/+</sup>:Flt1<sup>Loxp/Loxp</sup>*). *In vitro* 4-OHT-mediated genetic deletion of *Flt1* (*MuSC-Flt1<sup>Δ/Δ</sup>*)  
208 resulted in down-regulation of *Flt1* RNA and FLT1 protein expression (Figure S2I, S2J), and  
209 increased spontaneous cell death even without induction of apoptosis (Figure 2F). By contrast,  
210 *Flt1* deletion did not affect cell proliferation assessed by EdU staining or myogenic  
211 differentiation assessed by MyHC staining (Figure S2K-M). When apoptosis was induced, the  
212 *MuSC-Flt1<sup>Δ/Δ</sup>* myoblasts had increased apoptosis that was not responsive to exogenous VEGFA  
213 (Figure 2G).

214

215 **AKT signaling is involved in apoptosis of muscle stem cells.**

216 VEGFA signaling is mediated through Extracellular signal-Regulated Kinase (ERK), p38  
217 Mitogen-Activated Protein Kinase (MAPK), and Protein kinase B (AKT). In ECs, VEGFA is  
218 known to protect cells from apoptosis via AKT (Domigan et al., 2015; Lee et al., 2007).

219 However, it is not known whether VEGFA can similarly activate AKT in MuSC-derived  
220 myoblasts. While the role of AKT has been explored in proliferation and differentiation in  
221 myoblasts, its role in apoptosis has not been well characterized (Loiben et al., 2017). We  
222 assessed for AKT activation via phosphorylated AKT (pAKT) in MuSC-derived myoblasts. We  
223 found that exogenous VEGFA could induce AKT phosphorylation (pAKT) (Figure 2H, 2I). This  
224 response was blunted in *MuSC-Flt1<sup>Δ/Δ</sup>* myoblasts and was no longer responsive to VEGFA  
225 (Figure 2H, 2I). Lastly, we wanted to confirm that AKT activation could improve myoblast  
226 survival. We infected lentiviral *E4ORF1* or *MyrAKT* vectors in myoblasts (Figure 2J), both of  
227 which gene products have been shown to specifically activate AKT without activating ERK or  
228 p38 (Kobayashi et al., 2010). We found that overexpression of either of these genes improved  
229 cell survival compared with the control *in vitro* following induction of apoptosis via thapsagargin  
230 (Figure 2J). These data establish FLT1-AKT as the cascade linking VEGFA to apoptosis in  
231 MuSC-derived myoblasts during muscle regeneration (Figure 2K).

232

### 233 **VEGFA-FLT1 pathway protects MuSCs from apoptosis *in vivo***

234 Endogenous and exogenous VEGFA have been shown to regulate cell survival and protect ECs  
235 from apoptosis *in vitro* (Gerber et al., 1998; Lee et al., 2007). To assess whether additional  
236 VEGFA had an effect of MuSC behaviors *in vivo*, we used mice carrying the *VEGFA<sup>+Hyper</sup>* allele  
237 for injury-mediated tibialis anterior (TA) muscle regeneration following BaCl<sub>2</sub> injection (Figure  
238 3A, 3B) (Miquerol et al., 1999). MuSC-derived myoblasts from *Pax7<sup>+tdT</sup>·VEGFA<sup>+Hyper</sup>* mice  
239 showed around 2.8 fold increased expression of *Vegfa* but not the *Vegfrs* compared with  
240 myoblasts from wild-type mice (Figure S3A). Interestingly, while treatment with VEGFA alone  
241 had no effect on apoptosis *in vitro*, the MuSCs from *Pax7<sup>+tdT</sup>·VEGFA<sup>+Hyper</sup>* mice showed

242 decreased cell death in regenerating muscle by 1 day following BaCl<sub>2</sub> injection (Figure 3C).  
243 Consequently, single muscle fibers from *Pax7<sup>+/tdT</sup>:VEGFA<sup>+Hyper</sup>* mice showed increased number  
244 of MuSCs, compared with those from *Pax7<sup>+/tdT</sup>:VEGFA<sup>+/+</sup>* mice by 28 days following BaCl<sub>2</sub>  
245 injection (Figure 3D). In addition, muscle regeneration was promoted in *VEGFA<sup>+Hyper</sup>* mice in  
246 the early and late muscle repair processes as judged by fiber diameter (Figures 3B, 3E, 3F, S3B-  
247 D).

248 We then performed the reciprocal experiment to investigate the consequence of *Vegfa*  
249 loss in MuSCs *in vivo*, and utilized MuSC-specific *Vegfa* knockout mice  
250 (*Pax7<sup>+/CreER</sup>:VEGFA<sup>Loxp/Loxp</sup>*). We have previously shown that vasculature in the MuSC-  
251 *VEGFA<sup>Δ/Δ</sup>* mouse muscle is perturbed and the proximity between the MuSC and EC is increased  
252 (Verma et al., 2018). However, the functional consequences of this remained unknown. We  
253 confirmed that clear downregulation of VEGFA protein in MuSC-derived myoblasts isolated from  
254 MuSC-*VEGFA<sup>Δ/Δ</sup>* mice (Figure S3E). We noticed that deletion of *Vegfa* in MuSCs in the *MuSC*-  
255 *VEGFA<sup>Δ/Δ</sup>* mouse muscle led to an increase in the proportion of dead MuSCs following BaCl<sub>2</sub>  
256 injection (Figure 3G). Consequently, the number of MuSCs in the *MuSC-VEGFA<sup>Δ/Δ</sup>* muscle were  
257 significantly reduced following recovery after injury (Figure 3H). There was no difference in the  
258 MuSC numbers in *MuSC-VEGFA<sup>Δ/Δ</sup>* muscle at homeostasis. In addition, the muscle had a  
259 regenerative defect as indicated by the shift in fiber size distribution and increased adipose  
260 following muscle injury (Figure 3B, 3I, 3J, S3F-H). While a limitation of this experiment is that  
261 the MuSC fusion into the fiber also deletes *Vegfa* from the fiber themselves, muscle fiber  
262 specific deletion of *Vegfa* has not shown to have an effect on fiber size (Delavar et al., 2014).  
263 These data indicate that cell intrinsic VEGFA improves cell survival of MuSCs and that loss of  
264 MuSC-derived VEGFA results in reduced muscle regeneration.

265           Since FLT1 but not FLK1 was detected in MuSCs and MuSC-derived myoblasts, we  
266 asked whether the *Flt1* had an effect on MuSC survival *in vivo*, we evaluated cell death in  
267 MuSCs from *MuSC-Flt1<sup>Δ/Δ</sup>* mouse muscle. We induced muscle regeneration using BaCl<sub>2</sub> for 1  
268 day and assessed for cell death in MuSCs. As seen *in vitro*, we found that loss of *Flt1* in MuSCs  
269 (Figure S2I, S2J) resulted in increased cell death during early regeneration (Figure 3K).  
270 Consequently, single muscle fibers from *MuSC-Flt1<sup>Δ/Δ</sup>* mice showed decreased number of  
271 MuSCs, compared with those from *MuSC-Flt1<sup>+/+</sup>* mice by 28 days following BaCl<sub>2</sub> injection  
272 (Figure 3L). We also examined the long-term *in vivo* consequence of deleting *Flt1* from MuSC.  
273 There was no significant muscle phenotype in *MuSC-Flt1<sup>Δ/Δ</sup>* muscle at homeostasis (Figures 3B,  
274 3M, 3N). However, following injury, the *MuSC-Flt1<sup>Δ/Δ</sup>* muscle had a modest regenerative defect  
275 as indicated by the shift in fiber size distribution following muscle injury (Figures 3B, 3M, 3N,  
276 S3J-N).

277

### 278 **VEGFA-FLT1 pathway regulates muscle pathology in DMD model mice**

279 While angiogenic defects have been reported in the *mdx* mice as well as in golden retrieval  
280 muscular dystrophy (GRMD; canine model of DMD) (Latroche et al., 2015; Verma et al., 2019,  
281 2010; Kodippili et al., 2021; Podkalicka et al., 2021), it is not clear whether VEGF family and its  
282 receptors are implicated in human dystrophinopathies. We probed the VEGF ligands and  
283 receptors in microarrays (Table S1) from skeletal muscles and MuSCs from *mdx* mice  
284 (Pallafacchina et al., 2010; Tseng et al., 2002) and skeletal muscles from the *GRMD* (Vieira et al.,  
285 2015). *Vegfa* was downregulated in both models (Figure S4A). *Flt1* was also downregulated in  
286 *GRMD* but not *mdx* muscles. To examine whether VEGF signaling is altered in DMD patients,  
287 we performed gene expression analysis on previously available data from microarrays from

288 patients with DMD (Chen et al., 2000). We also aggregated and probed microarray data from  
289 muscle biopsies of patients with various neuromuscular diseases or of healthy individuals after  
290 exercise (Bakay et al., 2006). In the microarray data, *Vegfa* expression was increased after an  
291 acute bout of exercise, and *Vegfa* expression was reduced in ALS muscle, BMD muscle, as well  
292 as both early and late phases of DMD muscle (Figure S4A). These data indicate that *Vegfa*  
293 expression is decreased in dystrophinopathy, and thus may benefit people with DMD by  
294 increasing VEGFA as a therapeutic target.

295 Therefore, we crossed the *MuSC-Flt1<sup>Δ/Δ</sup>* mice with the chronically regenerating DMD  
296 model mice (*mdx*) to generate *mdx:MuSC-Flt1<sup>Δ/Δ</sup>* mice, and analyzed long term effects of *Flt1*  
297 deletion (Figure 4A, S4B). Importantly, we found a significant decrease in fiber diameter and  
298 increased fibrosis (Figures 4B-D, S4C) in TA muscle accompanied by a physiological decrease in  
299 muscle perfusion as shown by laser Doppler flow at 12 months age (Figure 4E) as well as a  
300 functional decline in muscle strength as judged by grip strength both acutely and chronically  
301 (Figure 4F).

302 By contrast, when we crossed the *VEGFA<sup>+Hyper</sup>* mice with *mdx* mice (Figure 4A, S4D),  
303 we noticed a significant increase in fiber diameter and decreased fibrosis (Figures 4G-I, S4E) in  
304 both TA and diaphragm muscle of *mdx:VEGFA<sup>+Hyper</sup>* mice accompanied by a physiological  
305 increase in muscle perfusion as shown by laser Doppler flow at 12 months age (Figure 4J) as  
306 well as a functional increase in muscle strength as judged by grip strength (Figure 4K). These  
307 data indicate that VEGFA-FLT1 axis is a therapeutic target for the pathology seen in the *mdx*  
308 mice

309

## 310 **Discussion**

311 In this report, we performed bulk and single cell RNA sequencing on MuSCs and ECs. Since  
312 deep reads can significantly reduce the effect of the technical noise in scRNAseq, it can improve  
313 estimation of minor transcriptional state of a given cell (Zhang, 2020). Unexpectedly, we found  
314 that MuSCs broadly express EC prototypic markers in small amounts and used multiple different  
315 bioinformatics techniques to validate the results. While similar phenomenon in myogenic cells  
316 during development and existence of blood vessel-associated myoendothelial cells in the adult  
317 skeletal muscle have been previously described, no functional follow up as been performed  
318 leading to the questions whether these minor expression profiles were artifacts or functional (De  
319 Angelis et al., 1999; Minasi, 2002; Tamaki et al., 2002; Zheng et al., 2007; Roobrouck, 2011;  
320 Huang et al., 2014; Charville et al., 2015; Goel et al., 2017; Giordani et al., 2018). Our goal was  
321 to see whether this small expression pattern had biological consequences. We ultimately decided  
322 to use *Flt1* for further investigations and used RNAscope and immunostaining to validate its  
323 expression in MuSCs. We found that *Flt1* indeed exerts a biological function even at a low  
324 expression. Signaling through VEGFA-FLT1-AKT can improve cell survival in MuSCs both *in*  
325 *vivo* and *in vitro*.

326 On a grander scale, our finding of EC prototype markers expressed in MuSC calls into  
327 two questions 1) the genes that we used to specify cellular identities and 2) the cellular identity  
328 of MuSCs and ECs. The former is important as when we experimentally label, induce or perform  
329 Cre-mediated gene knockout experiments based on our assumptions of different gene expression  
330 results which may be confounded for these low expressing genes. For example, we have  
331 previously investigated both *Flt1* and *Kdr* in mouse muscle using three different reporters and

332 found them to be negative in MuSCs, thereby disregarding their cell-autonomous effect when  
333 evaluating global knockouts (Verma et al., 2018, 2010). It is also possible that EC mRNAs are  
334 results of transcription from the cell or a result of mRNA transfer from neighboring cells  
335 (Desrochers et al., 2016). Of note, the transmission of *tdTomato* mRNA and protein from  
336 *Pax7<sup>+/CreERT2</sup>:R26R<sup>+/tdT</sup>* mice used in this study has been recently shown via exosome, opening  
337 up the possibility of transmission of other mRNA from MuSC to ECs (Murach et al., 2020). The  
338 later is an interesting phenomenon from a developmental point of view. MuSCs and ECs arise  
339 from a bipotent progenitor originated from somites during early development (Kardon et al.,  
340 2002; Hutcheson, 2009; Lagha, 2009; Mayeuf-Louchart, 2014; Mayeuf-Louchart, 2016).  
341 Therefore, it is possible that there is a permissive chromatin state that allows for expression of  
342 reciprocal genes in the two populations. Along the lines of these observations, FLK1(+) or VE-  
343 cadherin(+) cells can contribute to myogenic cells *in vitro* and after cell transplantation (Tamaki  
344 et al., 2002; Le Grand et al., 2004; Zheng et al., 2007; Huang et al., 2014;), and during  
345 development (Drummond and Hatley, 2018; Mayeuf-Louchart et al., 2014; Motoike et al., 2003).  
346 Important notion is that the PDGFR $\alpha$ (-)/FLK1(+) population exhibited restricted potential to  
347 differentiate into the MuSCs in injured muscle (Sakurai et al., 2008). Interestingly, in the  
348 zebrafish, exogenous expression of *Etv2* in the fast muscle can lead to transdifferentiation of  
349 muscle fibers into functional vessels so there is evidence of cell fate flexibility (Veldman et al.,  
350 2013). The potential of EC transdifferentiation was also examined by ETV2 overexpression in  
351 five human cell types, skeletal muscle cells, adipose-derived mesenchymal stem cells, umbilical  
352 cord-derived mesenchymal stem cells, embryonic lung fibroblast cells and skin fibroblast cells.  
353 Among them, human skeletal muscle cells showed the highest amenability for this EC induction  
354 following infection with ETV2 lentivirus vector (Yan et al., 2019). Conversely, *Etv2*-deficient



355 vascular progenitors can differentiate into skeletal muscle cells (Chestnut et al., 2020). It would  
356 be interesting to see whether other EC gene signatures also have functional consequences in the  
357 MuSC or muscle at large.

358 We decided to focus on function of *Flt1* among several EC genes expressed in MuSCs  
359 for further investigations on MuSC biology. Our pharmacological and genetic analyses  
360 demonstrate that MuSC-derived VEGFA has a drastic effect on cell survival in the via its  
361 receptor FLT1 by signaling through AKT1. While VEGFA binds to both FLT1 and FLK1,  
362 VEGFB and PGF only bind to FLT1. This creates a scenario where PGF and VEGFB binding  
363 can sequester FLT1, increasing free VEGFA availability for VEGFA-FLK1 binding which is the  
364 major VEGF signaling pathway for many cell types (Vempati et al., 2014). While PGF is not  
365 normally expressed in adult tissues, VEGFB is expressed in the MuSCs and muscle fiber (data  
366 not shown). Importantly, the VEGFB-FLT1 axis has also been shown to inhibit apoptosis in  
367 retina and brain cells in mouse models of ocular neurodegeneration and stroke (Li et al., 2008).  
368 While our results cannot rule out the involvement of VEGFB in protection of MuSC apoptosis,  
369 we provide evidence from both pharmacological and genetic data to indicate that VEGFA is  
370 involved.

371 Despite drastic effect of VEGFA-FLT1 on apoptosis *in vitro*, the long-term consequences  
372 of *in vivo* deletion of *Flt1* in the MuSC compartment were modest compared with deletion of  
373 *Vegfa* in the MuSCs unless crossing with *mdx* mice. Although *Vegfa* is required for both MuSC  
374 survival and recruitment of vascular niche (Verma et al., 2018), in the steady state, the MuSC  
375 turnover may be low enough that the apoptotic stress burden is low. VEGFA improves cell  
376 survival during the proliferative stage following injury, however this transient improvement in

377 survival has only a modest impact on the final regenerative process as shown in  
378 *mdx:VEGFA<sup>+Hyper</sup>* mice.

379 VEGFA and FLT1 targeted therapies are being explored as both pro- and anti-angiogenic  
380 therapies for several indications including retinal degeneration, cancer, pre-eclampsia and  
381 neuromuscular diseases (Bae et al., 2005; Keifer et al., 2014; Mac Gabhann et al., 2011; Verma  
382 et al., 2010; Verma et al., 2019; Bosco et al., 2021; Xin et al., 2021). As these therapies mature,  
383 it will be important to ascertain the MuSC-specific effects of VEGFA and FLT1.

384

## 385 **Materials and Methods**

### 386 **Mice**

387 *Flt1<sup>LoxP/LoxP</sup>* were obtained from Gua-Hua Fong (Ho et al., 2012). *B6.Cg-Pax7<sup>tm1(cre/ERT2)Gaka/J</sup>*  
388 (*Pax7<sup>+/CreERT2</sup>*; JAX stock# 017763; Murphy et al., 2011), *B6.Cg-Gt(ROSA)<sup>26Sortm9(CAG-tdTomato)Hze/J</sup>*  
389 (*Ai9*; JAX stock # 007909; Madisen et al., 2010), *VEGFA<sup>+/Hyper</sup> (Vegfatm1.1Nagy/J*; JAX stock#  
390 027314; Miquerol et al., 1999) and *B6Ros.Cg-Dmd<sup>mdx-5cv/J</sup> (mdx<sup>5cv</sup>*; JAX stock #002379;  
391 Chapman et al., 1989) were obtained from Jackson Laboratory. *Kdr<sup>tm2.1Jrt/J</sup> (Flk1<sup>+GFP</sup>)* were  
392 obtained from Masatsugu Ema (Ema et al., 2006). *B6.Cg-Pax7<sup>tm1(cre/ERT2)Gaka/J</sup> (Pax7<sup>+/CreERT2</sup>)*  
393 mice were crossed with the *B6.Cg-Gt(ROSA)<sup>26Sortm9(CAG-tdTomato)Hze/J</sup> (Ai9)* to yield the  
394 *Pax7<sup>+/CreERT2</sup>:R26R<sup>tdT</sup>(Pax7<sup>tdT</sup>)* mice. *Pax7<sup>tdT</sup>* mice were bred with the *VEGFA<sup>+/Hyper</sup>* and  
395 *Flk1<sup>+GFP</sup>* to obtain *Pax7<sup>+tdT</sup>:VEGFA<sup>+/Hyper</sup>* and *Pax7<sup>+tdT</sup>:Flk1<sup>+GFP</sup>* mice. *VEGFA<sup>LoxP/LoxP</sup>* mice  
396 obtained from Napoleone Ferrara (Gerber et al., 1999) were crossed with *Pax7<sup>+/CreERT2</sup>* to yield  
397 the *Pax7<sup>+/CreERT2</sup>: VEGFA<sup>LoxP/LoxP</sup>* mice. *Flt1<sup>LoxP/LoxP</sup>* mice obtained from Guo-Hua Fong (Ho et al.,  
398 2012) were crossed with *Pax7<sup>+/CreERT2</sup>* to yield the *Pax7<sup>+/CreERT2</sup>:Flt1<sup>LoxP/LoxP</sup>* mice. Colonies for all  
399 the mice were established in the laboratory. Cre recombination was induced using tamoxifen  
400 (Sigma-Aldrich, T5648) dosed as 75 mg/kg body weight x 3 times over one week at 3-6 weeks  
401 of age. Mice carrying the wild-type *CreERT2* allele were used for control experiments. TA  
402 muscle regeneration was induced by intramuscular injection of 20  $\mu$ l of 1% BaCl<sub>2</sub> (Sigma-  
403 Aldrich, 342920) or 20  $\mu$ l of 10  $\mu$ M Cardiotoxin (CTX) (Sigma-Aldrich, V9125). Mice used for  
404 this study is summeried in Table S2.

405 Genotyping to detect the transgenic and mutant alleles was performed by PCR using the  
406 primers described on the web site of Jackson Laboratory shown in Table S3. All primers were  
407 synthesized as custom DNA oligos from Integrated DNA technologies (IDT). Genotyping to

408 detect the mutated allele of *mdx*<sup>5<sup>cv</sup></sup> was performed by PCR using the primers (0981 and 0982)  
409 shown in Table S1. The PCR product DNA was digested with *Dra*III restriction enzyme (New  
410 England Biolabs, R3510S). Wild-type allele generated 180 bp and mutant allele generated 50  
411 and 130 bp bands.

412 The animals were housed in an SPF environment and were monitored by the Research  
413 Animal Resources (RAR) of the University of Minnesota. All protocols were approved by the  
414 Institutional Animal Care and Usage Committee (IACUC) of the University of Minnesota and  
415 complied with the NIH guidelines for the use of animals in research.

416

#### 417 **Cell isolation by FACS**

418 *Pax7*<sup>tdT</sup>:*Flk1*<sup>GFP</sup> mice were utilized for FACS-mediated MuSC and EC isolation as previously  
419 described (Asakura et al, 2002; Verma, 2018). We performed extensive validation of the  
420 fluorescent reporter mice as previously described (Figure S1A-C; Verma, 2018). Briefly,  
421 quiescent MuSCs and ECs were isolated from the hind limb skeletal muscle of 1–2-mo-old  
422 *Pax7*<sup>tdT</sup>:*Flk1*<sup>GFP</sup> mice after digestion with collagenase type II. FACS was performed on an FACS  
423 sorter (BD FACSAria) and data were analyzed using FlowJo (BD Biosciences). Sorting gates,  
424 tdTomato(+) for MuSCs and GFP(+) for ECs, were strictly defined based on control cells  
425 isolated from wild-type mice and the forward scatter and side scatter gating. Sorted cells were  
426 immediately characterized by immunostaining on slide glasses, utilized for RNA preparation or  
427 cultured on collagen-coated plates in the myoblast growth medium as below to obtain MuSC-  
428 derived myoblasts and ECs. FACS analysis was performed as previously described (Turaç et al.,  
429 2013). Cells were either trypsinized (cultured cells) or a single cell suspension was obtained  
430 following enzymatic digestion as whole muscle-derived cells (Asakura, 2002). Cells were then

431 washed with FACS buffer (2% BSA and 1 mM EDTA in PBS) followed by live/dead staining  
432 using ZombieNIR (Biolegends, 423105). Cells were washed, then immunostained for cell  
433 surface markers. Blocking cells was performed with 1% BSA/PBS, and cells were incubated in  
434 fluorescently-conjugated antibody. FACS was performed on a Fortessa X-20 (BD Biosciences)  
435 with a 355 nm, 405 nm, 488 nm, 561 nm, and 640 nm lasers.

436

### 437 **Cell culture**

438 MuSC-derived myoblast isolation from adult mice was performed as previously described  
439 (Asakura et al, 2001; Motohashi et al., 2014). Briefly, after collagenase type II (Worthington,  
440 CLS-2) treatment, dissociated cells from mouse hindlimb muscle were incubated with anti-  
441 CD31-PE (eBiosciences, 12-0311), anti-CD45-PE (eBiosciences, 30-F11), anti-Sca1-PE  
442 (eBiosciences, Dec-81) and anti-Integrin  $\alpha 7$  (MBL International, ABIN487462), followed by  
443 anti-PE microbeads (Miltenyi Biotec, 130-048-801), and then performed LD column (Miltenyi  
444 Biotec, 130-042-901) separation. Negative cell populations will be incubated with anti-Mouse  
445 IgG beads (Miltenyi Biotec, 130-048-402), and then MS column (Miltenyi Biotec, 130-042-  
446 201) separation was performed to isolate Integrin  $\alpha 7$ (+) MuSCs. MuSC-derived myoblasts were  
447 maintained in culture on collagen coated plates in myoblast medium containing 20% FBS and 20  
448 ng/ml bFGF (Invitrogen, PHG0263) in HAM's-F10 medium. Cell cultures were maintained in a  
449 humidified incubator at 37°C with 5% CO<sub>2</sub> and 5% O<sub>2</sub>. 4-hydroxy tamoxifen (4-OHT, Sigma-  
450 Aldrich, H6278) treatment (1  $\mu$ M in EtOH) was used to induce *Flt1* deletion in myoblasts  
451 isolated from *Flt1<sup>LoxP/LoxP</sup>:Pax7<sup>CreERT2</sup>* mice. For cell survival assay, 1 x 10<sup>5</sup> cells were allowed to  
452 adhere for one day and starved overnight in 0.1% FBS in HAM's F10 medium. Then, cells were  
453 exposed to 1  $\mu$ M EdU along with or without 2-100 ng/ml recombinant VEGFA (R&D Systems,

454 493-MV) for 8 hours before being fixed and stained by the Click-iT EdU Alexa Fluor 488  
455 Imaging Kit (Thermo Scientific, C10337). For induction of apoptosis in myoblasts, ( $1-2 \times 10^5$ )  
456 cells were allowed to adhere to the plates for 16 hours. Thapsigargin-mediated apoptosis was  
457 induced by  $1 \mu\text{M}$  of thapsigargin (Sigma-Aldrich, T9033) dissolved in EtOH with or without  
458 VEGFA,  $100 \text{ ng/ml}$  recombinant FLT1-FC (R&D Systems, 7756-FL),  $1 \mu\text{g/ml}$  anti-FLT1  
459 monoclonal antibody (Angio-Proteomie, MAB7072), inhibitors of FLK1,  $3 \mu\text{M}$  ZM306416  
460 (R&D Systems, 2499/1) and  $10 \mu\text{M}$  of SU5402 (R&D Systems, 3300/1) and an inhibitor of  
461 NRP1,  $30 \mu\text{M}$  of EG00229 (R&D Systems, 6986/10) for 24 hours. UV light-mediated apoptosis  
462 was induced by exposing the cells to UV light in cell culture hood for 45 seconds without  
463 medium. After UV exposure, cell survival was assessed 24 hours following culture in 0.1% FBS  
464 in HAM's F10 medium with or without VEGFA using the Crystal violet Assay Kit (Abcam,  
465 ab232855) and quantated the Crystal violet dye after solubilization by absorbance at 570 nm. To  
466 induce differentiation of myoblasts, the myoblast medium was replaced with differentiation  
467 medium that contained DMEM supplemented with 5% horse serum with or without VEGFA or  
468 bFGF for 1 or 3 days followed by anti-sarcomeric myosin heavy chain antibody (Developmental  
469 Study Hybridoma Bank, MF-20).

470

#### 471 **AKT induction**

472 The lentiviral pCCL-E4ORF1 and pCCL-myrAkt1 constructs were a kind gift from Dr. Jason  
473 Butler (Kobayashi et al., 2010). 293FT cells (Thermo Fisher Scientific, R70007) were seeded in  
474 DMEM with 10% FBS and transfected with the lentivirus vectors along with pCMV-VSV-G  
475 (Addgene, 8454), pRSV-Rev (Addgene, 12253), and pMDLg/pRRE (Addgene, 12251) using  
476 PolyJet transfection reagent (Signagen Laboratories, SL100688). The culture supernatant of the

477 transfected 293FT cells was added to MuSC-derived myoblast culture with 0.8  $\mu$ g/ml polybrene  
478 (MilliporeSigma, H9268). pAKT1(+) cells were stained with anti-pAKT antibody (Cell  
479 Signaling, 4060).

480

#### 481 **Apoptosis assay**

482 Apoptosis was measured using measured using Annexin V-Biotin Apoptosis Detection Kit  
483 (eBioscience™, BMS500BT-100) as per the manufacture's instruction. Streptavidin-conjugated  
484 AlexaFluro-488 was used for detection. Propidium Iodide (PI) was used in all assays except  
485 when Pax7tdT(+) cells were utilized or when ZombieNIR (Biolegends, 423105) was used. FACS  
486 was performed on a Fortessa X-20 (BD Biosciences) equipped with a 355 nm, 405 nm, 488 nm,  
487 561 nm, and 640 nm lasers.

488

#### 489 **Immunostaining of cells**

490 Immunostaining for PECAM1, VE-Cadherin, VEGFA, VEGFRs was performed on collagen  
491 coated coverslips. Other immunostaining was performed on 30 mm tissue culture plates. Cells  
492 were fixed with 2% PFA for 5 minutes and immunostained as previously described (Verma et al.,  
493 2010). For membrane receptor staining, cells were permeabilized with 0.01% saponin  
494 (ThermoFisher Scientific, ICN10285525) which was kept in the staining solution until the  
495 primary antibodies were washed off. At which time, 0.01% Triton-X was added to all the buffers.  
496 The antibodies used for this study are listed in Table S4.

497

#### 498 **Single muscle fiber isolation and staining**

499 Extensor digitorum longus (EDL) muscle was dissected and digested with 0.2% collagenase type  
500 I (Sigma-Aldrich, C0130) for single muscle fiber isolation as previously described (Verma et al.,  
501 2010). Single muscle fibers were fixed with 2% PFA/PBS, permeabilized with 0.2% Triton-  
502 X100 and counterstained with DAPI. Anti-Pax7 antibody(+) or tdTomato(+) MuSCs per single  
503 muscle fiber were counted manually.

504

### 505 **RNAscope**

506 RNAscope for *Flt1* transcripts was performed as previously described (Kann and Krauss, 2019)  
507 on single muscle fibers from *Pax7<sup>tdT</sup>* mice using the RNAscope Probe - Mm-Flt1 (C1) (ACDBio,  
508 415541). Briefly, isolated EDL fibers are fixed in 4% PFA, washed with PBS, and dehydrated in  
509 100% methanol. Subsequently, fibers are rehydrated in a stepwise gradient of decreasing  
510 methanol concentrations in PBS/0.1% Tween-20. Fibers are treated with a proteinase for 10  
511 minutes, followed by hybridization, amplification, and fluorophore conjugation steps.

512

### 513 **Histology**

514 The mouse tibialis anterior (TA) muscle was used for all histological analysis. Tissues were  
515 frozen fresh using LiN<sub>2</sub> chilled isopentane and stored at -80°C. Eight μm thick transverse  
516 cryosections were used for all histological analysis. Hematoxylin & Eosin (HE) staining were  
517 performed as previously described (Verma et al., 2010). Sirius red (Direct Red 80, Sigma-  
518 Aldrich, 365548) staining was performed for muscle sections for fibrosis as previously described  
519 (Shimizu-Motohashi et al., 2015). Muscle sections were stained in Oil Red O solution (Sigma-  
520 Aldrich, O1391-250ML) as previously described (Wang et al., 2017). Microscopic images were  
521 captured by a DP-1 digital camera attached to BX51 fluorescence microscope with 10x or 40×



522 UPlanFLN objectives with cellSens Entry 1.11 (all from Olympus). Photoshop (Adobe) and Fiji  
523 (NIH) were used for image processing and manually enumerating the fiber diameter (Schindelin  
524 et al., 2012).

525

### 526 **Grip strength test**

527 Forelimb grip strength test was performed following a previously published procedure (Aartsma-  
528 Rus and van Putten, 2014). Briefly, mice were gently pulled by the tail after fore limb-grasping a  
529 metal bar attached to a force transducer (Grip Strength Meter, Columbus Instruments, 1027CSM-  
530 D52). Grip strength tests were performed by the same blinded examiner. Five consecutive grip  
531 strength tests were recorded, and then mice were returned to the cage for a resting period of 20  
532 minutes. Then, three series of pulls were performed each followed by 20 min resting period. The  
533 average of the three highest values out of the 15 values collected was normalized to the body  
534 weight for comparison.

535

### 536 **Muscle perfusion**

537 RBC flux was evaluated using the moorLab™ laser Doppler flow meter as previously described  
538 (Verma, 2010) with the MP7a probe that allows for collecting light from a deeper tissue level  
539 than standard probes according to the manufacturer's instructions (Moor Instruments). The fur  
540 from the right hind leg was removed using a chemical depilatory. Readings were taken using the  
541 probe from at least 10 different spots on the TA muscle. The AU was determined as the average  
542 AU value during a plateau phase of each measurement.

543

### 544 **RNA and genomic DNA isolation and qPCR**

545 Cultured cells were washed with ice cold PBS and lysed on the place with Trizol™. RNA was  
546 isolated using the DirectZol™ RNA Microprep Kit (Zymo Research, R2062) with on-column  
547 DNase digestion followed by cDNA synthesis using the Transcriptor First Strand cDNA  
548 synthesis kit (Roche Molecular Diagnostics, 04379012001) using random primers. Genomic  
549 DNA for genotyping was isolated from mouse tail snips with lysis buffer containing Proteinase  
550 K (Sigma-Aldrich, P2308). qPCR was performed using GoTaq qPCR Master Mix (Promega,  
551 A6002). The input RNA amount was normalized across all samples and *18S rRNA* or *HtatsFl*  
552 was used for normalization of qPCR across samples. Primer sequences are listed in Table S3. All  
553 primers were synthesized as custom DNA oligos from Integrated DNA technologies (IDT).

554

#### 555 **Single cell RNasequencing and analysis**

556 Cells for single cell RNaseq were obtained from hind limb muscles of 2-3 moth-old  
557 *Pax7<sup>tdT</sup>;Flk1<sup>GFP</sup>* mice following enzymatic digestion as previously described (Liu et al., 2015).  
558 Dead cells were excluded from the analysis using ZombieNIR (Biolegends, 423105).  
559 TdTomato(+) and GFP(+) cells were sorted individually and then 20% of GFP(+) cells were  
560 spiked into 80% tdTomato(+). We loaded ~5,000 cells into 1 channel of the Chromium system  
561 for each of these samples and prepared libraries according to the manufacturer's protocol using  
562 version 2.0 chemistry (10x Genomics). Following capture and lysis, we synthesized cDNA and  
563 amplified for 12 cycles as per the manufacturer's protocol (10x Genomics). The amplified cDNA  
564 was used to construct Illumina sequencing libraries that were each sequenced with ~300K  
565 read/cell on one lane of an Illumina HiSeq 2500 machine. We used Cell Ranger 3.1 (10X  
566 Genomics) to process raw sequencing data. For A custom genome was constructed to include  
567 *eGFP-SV40*, *tdTomato-WPRE-BGHPolyA* and *Pax7-IRES-CreERT2* transgenes. Detailed step-

568 by-step instructions can be found at <https://github.com/verma014/10XCustomRef>. We carried  
569 out analyses of the filtered data using Seurat suite version 3.0 (Stuart et al., 2019) in R studio  
570 (RStudio Team, 2020). For cell imputation, we utilized ALRA through the Seurat wrapper with  
571 default settings(Linderman et al., 2018). Additional scRNAseq datasets were obtained from GEO  
572 and analyzed using the same method as listed above. A myogenic score was calculated based on  
573 the expression of *Myog*, *Pax7*, *Myod1* and *Myf5*. Step-by-step instructions for the analysis can be  
574 found on <https://github.com/verma014/10XCustomRef>.

575

### 576 **Background Subtraction**

577 10x Genomics scRNAseq platform uses many more droplets than cells and so following a run,  
578 there are many droplets that do not have cells. These droplets still get sequenced with some of  
579 the RNA that is in the solution. This floating RNA can be used to estimate the "background" in  
580 each droplet. A better description of this can be found by the developers of 'SoupX' (Young and  
581 Behjati, 2020). Since *Cdh5* expression has previously been verified in MuSCs using RNAscope,  
582 we were able to use it as a positive control to remove the background or "soup" from our data. If  
583 *Cdh5* is absent from MuSC, we know that the background subtraction was too aggressive and  
584 that subtracting the Soup is not reliable in our case. In addition, we know certain genes that are  
585 considered to be specific for MuSCs, muscle ECs or muscle fibers based on the bulk RNAseq  
586 (Verma et al., 2018). The top 5 genes that are specific to these population (and also detected by  
587 10x) were selected and used to show the background in our data set was 14.40% and 13.89% for  
588 the D0 and D3 dataset, respectively. The step-by-step instructions can be found on  
589 <https://github.com/verma014/10XCustomRef>.

590

## 591 **Bulk RNAseq and Microarray Analysis**

592 FASTQ files were downloaded from SRA using SRA-toolkit. Sequences were trimmed using  
593 trimmomatic to remove adapter contamination and low-quality reads. Trimmed sequences were  
594 mapped to mouse mm10 using Hisat2 (Pertea et al., 2016). Transcript assembly was performed  
595 using StringTie (Pertea et al., 2016). Cell type specificity was determined as previously  
596 described (Verma et al., 2018). Microarray analysis was performed using the Affymetrix  
597 Transcriptome Analysis Console (TAC). Samples in each experiment were RNA normalized and  
598 the expression was acquired using the Affymetrix Expression analysis console with gene level  
599 expression. Heatmaps were generated in Prism 9 (Graphpad, La Jolla, CA). The code for  
600 generating each graph is listed in the following table, along with the link to the data in tabular  
601 format.

602

## 603 **Quantification and Statistical Analysis**

604 Statistical analysis was performed using Prism 9 (Graphpad, La Jolla, CA) or RStudio (RStudio  
605 Team, 2020). For comparison between two groups, an unpaired T-test was used. For comparison  
606 between multiple groups, a one-way ANOVA was used with multiple comparisons to the control.  
607 Distributions were compared using a chi-squared test. Graphing of the data was performed using  
608 Prism 9. Vector diagrams were modified using Graphic (Autodesk). All values are means  $\pm$ SEM  
609 unless noted otherwise. \* indicates  $p < 0.05$ , \*\* indicates  $p < 0.01$ , \*\*\* indicates  $p < 0.001$ .

610

## 611 **Data and Software Availability**

612 All the data was obtained from NCBI GEO. Microarrays of mouse MuSCs were obtained from  
613 GSE3483 (Fukada et al., 2007). scRNAseq of MuSCs and muscle ECs was performed in this

614 study (GSE129057). scRNAseq of whole muscle was obtained from GSE143437 (De Micheli et  
615 al., 2020). Bulk RNAseq of MuSCs, ECs and single muscle fibers was obtained from  
616 GSE108739 (Verma et al., 2018) and GSE64379 (Ryall et al., 2015). Bulk RNAseq of TU-  
617 tagged RNA of MuSCs was obtained from GSE97399 (van Velthoven et al., 2017). Bulk  
618 RNAseq of fixed and unfixed MuSCs was obtained from GSE113631 (Yue et al., 2020).  
619 Exercise, ALS, DMD, BMD, FSHD GSE3307, Early DMD GSE465, *mdx* GSE466, GRMD  
620 GSE69040, Satellite cells GSE15155. All arrays were normalized to their respective controls. All  
621 arrays and RNAseq data are listed in Supplemental Table 1 (Table S1).

622

### 623 **Acknowledgements**

624 We thank Minnesota Supercomputing Institute, University of Minnesota Imaging Center,  
625 University of Minnesota FACS Facility, and University of Minnesota Genomics Center for  
626 providing data for this paper. We also thank Jake Trask for critical reading of this paper. We  
627 thank Drs. Yosuke Mukoyama (National Institute of Health), Napoleone Ferrara (Genentech),  
628 Guo-Hua Fong (University of Connecticut) and Masatsugu Ema (Siga University of Medical  
629 Science) for providing *VEGFA<sup>LoxP/LoxP</sup>*, *Flt1<sup>LoxP/LoxP</sup>* and *Flk1-GFP* mice, respectively. This work  
630 was supported by NIHT32-GM008244 and NIHF30AR066454 to MV and NIHR01AR062142,  
631 NIHR21AR070319, MDA Research Grant, and Regenerative Medicine Minnesota (RMM) Grant  
632 to AA.

633

### 634 **Competing interests**

635 The authors declare no competing interests.

636

637 **Reference**

- 638 Aartsma-Rus A, van Putten M. 2014. Assessing Functional Performance in the Mdx Mouse  
639 Model. *J Vis Exp*. doi:10.3791/51303
- 640 Arsic N, Zacchigna S, Zentilin L, Ramirez-Correa G, Pattarini L, Salvi A, Sinagra G, Giacca M.  
641 2004. Vascular endothelial growth factor stimulates skeletal muscle regeneration in vivo.  
642 *Mol Ther* **10**:844–854. doi: 10.1016/j.ymthe.2004.08.007
- 643 Asakura A, Komaki M, Rudnicki M. 2001. Muscle satellite cells are multipotential stem cells  
644 that exhibit myogenic, osteogenic, and adipogenic differentiation. *Differentiation* **68**:245–  
645 253. doi: 10.1046/j.1432-0436.2001.680412.x.
- 646 Asakura A, Seale P, Girgis-Gabardo A, Rudnicki MA. 2002. Myogenic specification of side  
647 population cells in skeletal muscle. *J Cell Biol* **159**:123–134. doi: 10.1083/jcb.200202092.
- 648 Bae DG, Kim TD, Li G, Yoon WH, Chae CB. 2005. Anti-flt1 peptide, a vascular endothelial  
649 growth factor receptor 1-specific hexapeptide, inhibits tumor growth and metastasis. *Clin*  
650 *Cancer Res* **11**:2651–2661. doi: 10.1158/1078-0432.CCR-04-1564
- 651 Bakay M, Wang Z, Melcon G, Schiltz L, Xuan J, Zhao P, Sartorelli V, Seo J, Pegoraro E,  
652 Angelini C, Shneiderman B, Escolar D, Chen Y-W, Winokur ST, Pachman LM, Fan C,  
653 Mandler R, Nevo Y, Gordon E, Zhu Y, Dong Y, Wang Y, Hoffman EP. 2006. Nuclear  
654 envelope dystrophies show a transcriptional fingerprint suggesting disruption of Rb-MyoD  
655 pathways in muscle regeneration. *Brain* **129**:996–1013. doi:10.1093/brain/awl023
- 656 Bosco J, Zhou Z, Gabriëls S, Verma M, Liu N, Miller BK, Gu S, Lundberg DM, Huang Y,  
657 Brown E, Josiah S, Meiyappan M, Traylor MJ, Chen N, Asakura A, De Jonge N, Blanchetot  
658 C, de Haard H, Duffy HS, Keefe D. 2021. VEGFR-1/Flt-1 inhibition increases  
659 angiogenesis and improves muscle function in a mouse model of Duchenne muscular

660 dystrophy. *Mol Ther Methods Clin Dev.* **23**:21:369-381. doi: 10.1016/j.omtm.2021.03.013

661 Bouchentouf M, Benabdallah BF, Bigey P, Yau TM, Scherman D, Tremblay JP. 2008. Vascular  
662 endothelial growth factor reduced hypoxia-induced death of human myoblasts and  
663 improved their engraftment in mouse muscles. *Gene Ther* **15**:404–414.  
664 doi: 10.1038/sj.gt.3303059

665 Bryan BA, Walshe TE, Mitchell DC, Havumaki JS, Saint-Geniez M, Maharaj AS, Maldonado  
666 AE, D’Amore PA, Bryan BA, Walshe TE, Mitchell DC, Havumaki JS, Saint-Geniez M,  
667 Maharaj AS, Maldonado AE, D’Amore PA. 2008. Coordinated vascular endothelial growth  
668 factor expression and signaling during skeletal myogenic differentiation. *Mol Biol Cell*  
669 **19**:994–1006. doi:10.1091/mbc.E07-09-0856

670 Charville GW, Cheung TH, Yoo B, Santos PJ, Lee GK, Shrager JB, Rando TA. 2015. Ex Vivo  
671 Expansion and In Vivo Self-Renewal of Human Muscle Stem Cells. *Stem cell Reports*  
672 **5**:621–32. doi:10.1016/j.stemcr.2015.08.004

673 Chen YW, Zhao P, Borup R, Hoffman EP. 2000. Expression profiling in the muscular  
674 dystrophies: identification of novel aspects of molecular pathophysiology. *J Cell Biol*  
675 **151**:1321–36. doi:10.1083/jcb.151.6.1321

676 Chestnut B, Casie Chetty S, Koenig AL, Sumanas S. 2020. Single-cell transcriptomic analysis  
677 identifies the conversion of zebrafish Etv2-deficient vascular progenitors into skeletal  
678 muscle. *Nat Commun* **11**:2796. doi:10.1038/s41467-020-16515-y

679 Christov C, Chretien F, Abou-Khalil R, Bassez G, Vallet G, Authier FJ, Bassaglia Y, Shinin V,  
680 Tajbakhsh S, Chazaud B, Gherardi RK. 2007. Muscle satellite cells and endothelial cells:  
681 close neighbors and privileged partners. *Mol Biol Cell* **18**:1397–1409.  
682 doi: 10.1091/mbc.e06-08-0693

- 683 De Angelis L, Berghella L, Coletta M, Lattanzi L, Zanchi M, Cusella-De Angelis MG, Ponzetto  
684 C, Cossu G. 1999. Skeletal myogenic progenitors originating from embryonic dorsal aorta  
685 coexpress endothelial and myogenic markers and contribute to postnatal muscle growth and  
686 regeneration. *J Cell Biol* **147**:869–877. doi:10.1083/jcb.147.4.869
- 687 De Micheli AJ, Laurilliard EJ, Heinke CL, Ravichandran H, Fraczek P, Soueid-Baumgarten S,  
688 De Vlaminck I, Elemento O, Cosgrove BD. 2020. Single-Cell Analysis of the Muscle Stem  
689 Cell Hierarchy Identifies Heterotypic Communication Signals Involved in Skeletal Muscle  
690 Regeneration. *Cell Rep* **30**:3583–3595.e5. doi:10.1016/j.celrep.2020.02.067
- 691 Delavar H, Nogueira L, Wagner PD, Hogan MC, Metzger D, Breen EC. 2014. Skeletal myofiber  
692 VEGF is essential for the exercise training response in adult mice. *AJP Regul Integr Comp*  
693 *Physiol* **306**:R586–R595. doi:10.1152/ajpregu.00522.2013
- 694 Desrochers LM, Antonyak MA, Cerione RA. 2016. Extracellular Vesicles: Satellites of  
695 Information Transfer in Cancer and Stem Cell Biology. *Dev Cell*. 37(4):301-309. doi:  
696 10.1016/j.devcel.2016.04.019.
- 697 Domigan CK, Warren CM, Antanesian V, Happel K, Ziyad S, Lee S, Krall A, Duan L, Torres-  
698 Collado AX, Castellani LW, Elashoff D, Christofk HR, van der Blik AM, Potente M,  
699 Iruela-Arispe ML. 2015. Autocrine VEGF maintains endothelial survival through regulation  
700 of metabolism and autophagy. *J Cell Sci* **128**:2236–48. doi:10.1242/jcs.163774
- 701 Drummond CJ, Hatley ME. 2018. A Case of mistaken identity: Rhabdomyosarcoma  
702 development from endothelial progenitor cells. *Mol Cell Oncol* **5**:e1448246.  
703 doi:10.1080/23723556.2018.1448246
- 704 Eichmann A, Marcelle C, Bréant C, Le Douarin NM. 1993. Two molecules related to the VEGF  
705 receptor are expressed in early endothelial cells during avian embryonic development. *Mech*



- 706 *Dev* **42**:33–48. doi:10.1016/0925-4773(93)90096-g
- 707 Ema M, Takahashi S, Rossant J. 2006. Deletion of the selection cassette, but not cis-acting  
708 elements, in targeted Flk1-lacZ allele reveals Flk1 expression in multipotent mesodermal  
709 progenitors. *Blood* **107**:111–7. doi:10.1182/blood-2005-05-1970
- 710 Esner M, Meilhac SM, Relaix F, Nicolas J-F, Cossu G, Buckingham ME. 2006. Smooth muscle  
711 of the dorsal aorta shares a common clonal origin with skeletal muscle of the myotome.  
712 *Development* **133**:737–49. doi:10.1242/dev.02226
- 713 Fukada S, Uezumi A, Ikemoto M, Masuda S, Segawa M, Tanimura N, Yamamoto H, Miyagoe-  
714 Suzuki Y, Takeda S. 2007. Molecular signature of quiescent satellite cells in adult skeletal  
715 muscle. *Stem Cells* **25**:2448–59. doi:10.1634/stemcells.2007-0019
- 716 Gay L, Miller MR, Ventura PB, Devasthali V, Vue Z, Thompson HL, Temple S, Zong H, Cleary  
717 MD, Stankunas K, Doe CQ. 2013. Mouse TU tagging: a chemical/genetic intersectional  
718 method for purifying cell type-specific nascent RNA. *Genes Dev* **27**:98–115.  
719 doi:10.1101/gad.205278.112
- 720 Gerber HP, McMurtrey A, Kowalski J, Yan M, Keyt B a, Dixit V, Ferrara N. 1998. Vascular  
721 endothelial growth factor regulates endothelial cell survival through the  
722 phosphatidylinositol 3'-kinase/Akt signal transduction pathway. Requirement for Flk-  
723 1/KDR activation. *J Biol Chem* **273**:30336–43. doi : 10.1074/jbc.273.46.30336
- 724 Germani A, Di Carlo A, Mangoni A, Straino S, Giacinti C, Turrini P, Biglioli P, Capogrossi MC.  
725 2003. Vascular endothelial growth factor modulates skeletal myoblast function. *Am J*  
726 *Pathol* **163**:1417–1428. doi: 10.1016/S0002-9440(10)63499-2
- 727 Giordani L, He GJ, Negroni E, Sakai H, Law JYC, Siu MM, Wan R, Corneau A, Tajbakhsh S,  
728 Cheung TH, Le Grand F. 2018. High-Dimensional Single-Cell Cartography Reveals Novel

- 729 Skeletal Muscle Resident Cell Populations. *SSRN Electron J* 1–13.  
730 doi:10.2139/ssrn.3249467
- 731 Goel AJ, Rieder MK, Arnold HH, Radice GL, Krauss RS. 2017. Niche Cadherins Control the  
732 Quiescence-to-Activation Transition in Muscle Stem Cells. *Cell Rep* **21**:2236–2250.  
733 doi:10.1016/j.celrep.2017.10.102
- 734 Hardy D, Besnard A, Latil M, Jouvion G, Briand D, Thépenier C, Pascal Q, Guguin A, Gayraud-  
735 Morel B, Cavaillon J-M, Tajbakhsh S, Rocheteau P, Chrétien F. 2016. Comparative Study  
736 of Injury Models for Studying Muscle Regeneration in Mice. *PLoS One* **11**:e0147198.  
737 doi:10.1371/journal.pone.0147198
- 738 Hirai H, Verma M, Watanabe S, Tastad C, Asakura Y, Asakura A. 2010. MyoD regulates  
739 apoptosis of myoblasts through microRNA-mediated down-regulation of Pax3. *J Cell Biol*  
740 **191**:347–65. doi:10.1083/jcb.201006025
- 741 Ho VC, Duan L-J, Cronin C, Liang BT, Fong G-H. 2012. Elevated vascular endothelial growth  
742 factor receptor-2 abundance contributes to increased angiogenesis in vascular endothelial  
743 growth factor receptor-1-deficient mice. *Circulation* **126**:741–52.  
744 doi:10.1161/CIRCULATIONAHA.112.091603
- 745 Huang P, Schulz TJ, Beauvais A, Tseng YH, Gussoni E. 2014.  
746 Intramuscular adipogenesis is inhibited by myo-endothelial progenitors with functioning  
747 Bmpr1a signalling. *Nat Commun.* 5:4063. doi: 10.1038/ncomms5063.
- 748 Hutcheson DA, Kardon G. 2009. Genetic manipulations reveal dynamic cell and gene functions:  
749 Cre-ating a new view of myogenesis. *Cell Cycle* **8**:3675–8. doi:10.4161/cc.8.22.9992
- 750 Kann AP, Krauss RS. 2019. Multiplexed RNAscope and immunofluorescence on whole-mount  
751 skeletal myofibers and their associated stem cells. *Dev* **146**. doi:10.1242/dev.179259

- 752 Kardon G, Campbell JK, Tabin CJ. 2002. Local extrinsic signals determine muscle and  
753 endothelial cell fate and patterning in the vertebrate limb. *Dev Cell* **3**:533–45.  
754 doi:10.1016/s1534-5807(02)00291-5
- 755 Keifer OP, O'Connor DM, Boulis NM. 2014. Gene and protein therapies utilizing VEGF for  
756 ALS. *Pharmacol Ther* **141**:261–71. doi:10.1016/j.pharmthera.2013.10.009
- 757 Kobayashi H, Butler JM, O'Donnell R, Kobayashi M, Ding B-S, Bonner B, Chiu VK, Nolan DJ,  
758 Shido K, Benjamin L, Rafii S. 2010. Angiocrine factors from Akt-activated endothelial cells  
759 balance self-renewal and differentiation of haematopoietic stem cells. *Nat Cell Biol*  
760 **12**:1046–56. doi:10.1038/ncb2108
- 761 Kodippili K, Thorne PK, Laughlin MH, Duan D. 2021. Dystrophin deficiency impairs vascular  
762 structure and function in the canine model of Duchenne muscular dystrophy. *J Pathol.*  
763 doi:10.1002/path.5704
- 764 Lagha M, Brunelli S, Messina G, Cumano A, Kume T, Relaix F, Buckingham ME. 2009.  
765 Pax3:Foxc2 reciprocal repression in the somite modulates muscular versus vascular cell fate  
766 choice in multipotent progenitors. *Dev Cell* **17**:892–9. doi:10.1016/j.devcel.2009.10.021
- 767 Latroche C, Matot B, Martins-Bach A, Briand D, Chazaud B, Wary C, Carlier PG, Chrétien F,  
768 Jouvion G. 2015. Structural and Functional Alterations of Skeletal Muscle Microvasculature  
769 in Dystrophin-Deficient mdx Mice. *Am J Pathol* **1**–13. doi:10.1016/j.ajpath.2015.05.009
- 770 Latroche C, Weiss-Gayet M, Muller L, Gitiaux C, Leblanc P, Liot S, Ben-Larbi S, Abou-Khalil  
771 R, Verger N, Bardot P, Magnan M, Chrétien F, Mounier R, Germain S, Chazaud B. 2017.  
772 Coupling between Myogenesis and Angiogenesis during Skeletal Muscle Regeneration Is  
773 Stimulated by Restorative Macrophages. *Stem Cell Reports* **9**.  
774 doi:10.1016/j.stemcr.2017.10.027

- 775 Le Grand F, Auda-Boucher G, Levitsky D, Rouaud T, Fontaine-Pérus J, Gardahaut M-F. 2004.  
776 Endothelial cells within embryonic skeletal muscles: a potential source of myogenic  
777 progenitors. *Exp Cell Res* **301**:232–41. doi:10.1016/j.yexcr.2004.07.028
- 778 Lee S, Chen TT, Barber CL, Jordan MC, Murdock J, Desai S, Ferrara N, Nagy A, Roos KP,  
779 Iruela-Arispe ML. 2007. Autocrine VEGF signaling is required for vascular homeostasis.  
780 *Cell* **130**:691–703. doi:10.1016/j.cell.2007.06.054
- 781 Li Y, Zhang F, Nagai N, Tang Z, Zhang S, Scotney P, Lennartsson J, Zhu C, Qu Y, Fang C, Hua  
782 J, Matsuo O, Fong GH, Ding H, Cao Y, Becker KG, Nash A, Heldin CH, Li X. 2008.  
783 VEGF-B inhibits apoptosis via VEGFR-1-mediated suppression of the expression of BH3-  
784 only protein genes in mice and rats. *J Clin Invest* **118**:913–923. doi:10.1172/JCI33673
- 785 Linderman GC, Zhao J, Kluger Y. 2018. Zero-preserving imputation of scRNA-seq data using  
786 low-rank approximation. *bioRxiv* 397588. doi: <https://doi.org/10.1101/397588>
- 787 Liu L, Cheung TH, Charville GW, Rando T a. 2015. Isolation of skeletal muscle stem cells by  
788 fluorescence-activated cell sorting. *Nat Protoc* **10**:1612–1624. doi:10.1038/nprot.2015.110
- 789 Liu Y, Berendsen AD, Jia S, Lotinun S, Baron R, Ferrara N, Olsen BR. 2012. Intracellular  
790 VEGF regulates the balance between osteoblast and adipocyte differentiation. *J Clin Invest*  
791 **122**:3101–3113. doi:10.1172/JCI61209
- 792 Loiben AM, Soueid-Baumgarten S, Kopyto RF, Bhattacharya D, Kim JC, Cosgrove BD. 2017.  
793 Data-Modeling Identifies Conflicting Signaling Axes Governing Myoblast Proliferation and  
794 Differentiation Responses to Diverse Ligand Stimuli. *Cell Mol Bioeng* **10**:433–450.  
795 doi:10.1007/s12195-017-0508-5
- 796 Mac Gabhann F, Qutub AA, Annex BH, Popel AS. 2011. Systems biology of pro-angiogenic  
797 therapies targeting the VEGF system. *Wiley Interdiscip Rev Syst Biol Med* **2**:694–707.

798       doi:10.1002/wsbn.92

799    Mayeuf-Louchart A, Lagha M, Danckaert A, Rocancourt D, Relaix F, Vincent SD, Buckingham  
800       M. 2014. Notch regulation of myogenic versus endothelial fates of cells that migrate from  
801       the somite to the limb. *Proc Natl Acad Sci U S A* **111**:8844–8849.  
802       doi:10.1073/pnas.1407606111

803    Mayeuf-Louchart A, Montarras D, Bodin C, Kume T, Vincent SD, Buckingham M. 2016.  
804       Endothelial cell specification in the somite is compromised in Pax3-positive progenitors of  
805       Foxc1/2 conditional mutants, with loss of forelimb myogenesis. *Development* **143**:872–9.  
806       doi:10.1242/dev.128017

807    Mercatelli N, Dimauro I, Ciafré SA, Farace MG, Caporossi D. 2010. AlphaB-crystallin is  
808       involved in oxidative stress protection determined by VEGF in skeletal myoblasts. *Free*  
809       *Radic Biol Med* **49**:374–82. doi:10.1016/j.freeradbiomed.2010.04.027

810    Messina S, Mazzeo A, Bitto A, Aguenouz M, Migliorato A, De Pasquale MG, Minutoli L,  
811       Altavilla D, Zentilin L, Giacca M, Squadrito F, Vita G. 2007. VEGF overexpression via  
812       adeno-associated virus gene transfer promotes skeletal muscle regeneration and enhances  
813       muscle function in mdx mice. *FASEB J* **21**:3737–3746. doi : 10.1096/fj.07-8459com

814    Minasi MG, Riminucci M, De Angelis L, Borello U, Berarducci B, Innocenzi A, Caprioli A,  
815       Sirabella D, Baiocchi M, De Maria R, Boratto R, Jaffredo T, Broccoli V, Bianco P, Cossu G.  
816       2002. The meso-angioblast: a multipotent, self-renewing cell that originates from the dorsal  
817       aorta and differentiates into most mesodermal tissues. *Development* **129**:2773–83. [doi:](https://doi.org/10.1242/dev.129.11.2773)  
818       10.1242/dev.129.11.2773

819    Miquerol L, Gertsenstein M, Harpal K, Rossant J, Nagy a. 1999. Multiple developmental roles  
820       of VEGF suggested by a LacZ-tagged allele. *Dev Biol* **212**:307–322.

- 821           doi:10.1006/dbio.1999.9355
- 822   Motohashi N, Asakura A. 2014. Muscle satellite cell heterogeneity and self-renewal. *Front Cell*
- 823           *Dev Biol* **2**:1–11. doi:10.3389/fcell.2014.00001
- 824   Motohashi N, Asakura Y, Asakura A. 2014. Isolation, culture, and transplantation of muscle
- 825           satellite cells. *J Vis Exp* 1–7. doi:10.3791/50846
- 826   Motoike T, Markham DW, Rossant J, Sato TN. 2003. Evidence for novel fate of Flk1+
- 827           progenitor: contribution to muscle lineage. *Genesis* **35**:153–9. doi:10.1002/gene.10175
- 828   Murach KA, Vechetti IJ, Van Pelt DW, Crow SE, Dungan CM, Figueiredo VC, Kosmac K, Fu X,
- 829           Richards CI, Fry CS, McCarthy JJ, Peterson CA. 2020. Fusion-Independent Satellite Cell
- 830           Communication to Muscle Fibers During Load-Induced Hypertrophy. *Function* **1**:1–15.
- 831           doi:10.1093/function/zqaa009
- 832   Murphy MM, Lawson J a, Mathew SJ, Hutcheson D a, Kardon G. 2011. Satellite cells,
- 833           connective tissue fibroblasts and their interactions are crucial for muscle regeneration. *J*
- 834           *Cell Sci* **124**:e1–e1. doi:10.1242/jcs098228
- 835   Noren DP, Chou WH, Lee SH, Qutub AA, Warmflash A, Wagner DS, Popel AS, Levchenko A.
- 836           2016. Endothelial cells decode VEGF-mediated Ca<sup>2+</sup> signaling patterns to produce distinct
- 837           functional responses. *Sci Signal* **9**:ra20–ra20. doi:10.1126/scisignal.aad3188
- 838   Okabe K, Kobayashi S, Yamada T, Kurihara T, Tai-nagara I. 2014. Neurons Limit Angiogenesis
- 839           by Titrating VEGF in Retina. *Cell* **159**:584–596. doi:10.1016/j.cell.2014.09.025
- 840   Olfert IM, Howlett RA, Tang K, Dalton ND, Gu Y, Peterson KL, Wagner PD, Breen EC. 2009.
- 841           Muscle-specific VEGF deficiency greatly reduces exercise endurance in mice. *J Physiol*
- 842           **587**:1755–1767. doi: : 10.1113/jphysiol.2008.164384
- 843   Pallafacchina G, François S, Regnault B, Czarny B, Dive V, Cumano A, Montarras D,

- 844 Buckingham M. 2010. An adult tissue-specific stem cell in its niche: a gene profiling  
845 analysis of in vivo quiescent and activated muscle satellite cells. *Stem Cell Res* **4**:77–91.  
846 doi:10.1016/j.scr.2009.10.003
- 847 Perteu M, Kim D, Perteu GM, Leek JT, Salzberg SL. 2016. Transcript-level expression analysis  
848 of RNA-seq experiments with HISAT, StringTie and Ballgown. *Nat Protoc* **11**:1650–1667.  
849 doi:10.1038/nprot.2016.095
- 850 Podkalicka P, Mucha O, Kaziród K, Bronisz-Budzyńska I, Ostrowska-Paton S, Tomczyk M,  
851 Andrysiak K, Stępniewski J, Dulak J, Łoboda A. 2021. Age-Dependent Dysregulation of  
852 Muscle Vasculature and Blood Flow Recovery after Hindlimb Ischemia in the mdx Model  
853 of Duchenne Muscular Dystrophy. *Biomedicines*. **9**:481. doi:  
854 10.3390/biomedicines9050481.
- 855 Poesen K, Lambrechts D, Van Damme P, Dhondt J, Bender F, Frank N, Bogaert E, Claes B,  
856 Heylen L, Verheyen A, Raes K, Tjwa M, Eriksson U, Shibuya M, Nuydens R, Van Den  
857 Bosch L, Meert T, D’Hooge R, Sendtner M, Robberecht W, Carmeliet P. 2008. Novel Role  
858 for Vascular Endothelial Growth Factor (VEGF) Receptor-1 and Its Ligand VEGF-B in  
859 Motor Neuron Degeneration. *J Neurosci* **28**:10451–10459. doi:10.1523/JNEUROSCI.1092-  
860 08.2008
- 861 Roobrouck VD, Clavel C, Jacobs SA, Ulloa-Montoya F, Crippa S, Sohni A, Roberts SJ, Luyten  
862 FP, Van Gool SW, Sampaolesi M, Delforge M, Luttun A, Verfaillie CM. 2011.  
863 Differentiation potential of human postnatal mesenchymal stem cells, mesoangioblasts, and  
864 multipotent adult progenitor cells reflected in their transcriptome and partially influenced by  
865 the culture conditions. *Stem Cells* **29**:871–82. doi:10.1002/stem.633
- 866 RStudio Team. 2020. RStudio: Integrated Development for R. RStudio, PBC, Boston, MA.

- 867 <http://www.rstudio.com/>
- 868 Ryall JG, Dell'Orso S, Derfoul A, Juan A, Zare H, Feng X, Clermont D, Koulnis M, Gutierrez-  
869 Cruz G, Fulco M, Sartorelli V. 2015. The NAD<sup>+</sup>-dependent sirt1 deacetylase translates a  
870 metabolic switch into regulatory epigenetics in skeletal muscle stem cells. *Cell Stem Cell*  
871 **16**:171–183. doi:10.1016/j.stem.2014.12.004
- 872 Sakurai H, Okawa Y, Inami Y, Nishio N, Isobe K. 2008. Paraxial mesodermal progenitors  
873 derived from mouse embryonic stem cells contribute to muscle regeneration via  
874 differentiation into muscle satellite cells. *Stem Cells* **26**:1865–73.  
875 doi:10.1634/stemcells.2008-0173
- 876 Schindelin J, Arganda-Carreras I, Frise E, Kaynig V, Longair M, Pietzsch T, Preibisch S,  
877 Rueden C, Saalfeld S, Schmid B, Tinevez J-Y, White DJ, Hartenstein V, Eliceiri K,  
878 Tomancak P, Cardona A. 2012. Fiji: an open-source platform for biological-image analysis.  
879 *Nat Methods* **9**:676–82. doi:10.1038/nmeth.2019
- 880 Stuart T, Butler A, Hoffman P, Hafemeister C, Papalexi E, Mauck WM, Hao Y, Stoeckius M,  
881 Smibert P, Satija R. 2019. Comprehensive Integration of Single-Cell Data. *Cell* **177**:1888-  
882 1902.e21. doi:10.1016/j.cell.2019.05.031
- 883 Tamaki T, Akatsuka A, Ando K, Nakamura Y, Matsuzawa H, Hotta T, Roy RR, Edgerton VR.  
884 2002. Identification of myogenic-endothelial progenitor cells in the interstitial spaces of  
885 skeletal muscle. *J Cell Biol* **157**:571–7. doi:10.1083/jcb.200112106
- 886 Tang K, Breen EC, Gerber H-P, Ferrara NM a, Wagner PD. 2004. Capillary regression in  
887 vascular endothelial growth factor-deficient skeletal muscle. *Physiol Genomics* **18**:63–69.  
888 doi:10.1152/physiolgenomics.00023.2004
- 889 Torre E, Dueck H, Shaffer S, Gospocic J, Gupte R, Bonasio R, Kim J, Murray J, Raj A. 2018.



- 890 Rare Cell Detection by Single-Cell RNA Sequencing as Guided by Single-Molecule RNA  
891 FISH. *Cell Syst* **6**:171-179.e5. doi:10.1016/j.cels.2018.01.014
- 892 Tozer S, Bonnin M-A, Relaix F, Di Savino S, García-Villalba P, Coumailleau P, Duprez D. 2007.  
893 Involvement of vessels and PDGFB in muscle splitting during chick limb development.  
894 *Development* **134**:2579–91. doi:10.1242/dev.02867
- 895 Tseng BS, Zhao P, Pattison JS, Gordon SE, Granchelli JA, Madsen RW, Folk LC, Hoffman EP,  
896 Booth FW. 2002. Regenerated mdx mouse skeletal muscle shows differential mRNA  
897 expression. *J Appl Physiol* **93**:537–45. doi:10.1152/jappphysiol.00202.2002
- 898 Turaç G, Hindley CJ, Thomas R, Davis JA, Deleidi M, Karaöz E, Pruszek J. 2013. Combined  
899 Flow Cytometric Analysis of Surface and Intracellular Antigens Reveals Surface Molecule  
900 Markers of Human Neuropoiesis. *PLoS One* **8**:1–14. doi:10.1371/journal.pone.0068519
- 901 van Velthoven CTJ, de Morree A, Egner IM, Brett JO, Rando TA. 2017. Transcriptional  
902 Profiling of Quiescent Muscle Stem Cells In Vivo. *Cell Rep* **21**:1994–2004.  
903 doi:10.1016/j.celrep.2017.10.037
- 904 Veldman MB, Zhao C, Gomez G a, Lindgren AG, Huang H, Yang H, Yao S, Martin BL,  
905 Kimelman D, Lin S. 2013. Transdifferentiation of fast skeletal muscle into functional  
906 endothelium in vivo by transcription factor *etv2*. *PLoS Biol* **11**:e1001590.  
907 doi:10.1371/journal.pbio.1001590
- 908 Vempati P, Popel AS, Mac Gabhann F. 2014. Extracellular regulation of VEGF: Isoforms,  
909 proteolysis, and vascular patterning. *Cytokine Growth Factor Rev* **25**:1–19.  
910 doi:10.1016/j.cytogfr.2013.11.002
- 911 Verma M, Asakura Y, Hirai H, Watanabe S, Tastad C, Fong G-H, Ema M, Call JA, Lowe DA,  
912 Asakura A. 2010. Flt-1 haploinsufficiency ameliorates muscular dystrophy phenotype by

- 913 developmentally increased vasculature in mdx mice. *Hum Mol Genet* **19**:4145–59.  
914 doi:10.1093/hmg/ddq334
- 915 Verma M, Asakura Y, Murakonda BSR, Pengo T, Latroche C, Chazaud B, McLoon LK,  
916 Asakura A. 2018. Muscle Satellite Cell Cross-Talk with a Vascular Niche Maintains  
917 Quiescence via VEGF and Notch Signaling. *Cell Stem Cell* **23**:530-543.e9.  
918 doi:10.1016/j.stem.2018.09.007
- 919 Verma M, Shimizu-Motohashi Y, Asakura Y, Ennen JP, Bosco J, Zhou Z, Fong G, Josiah S,  
920 Keefe D, Asakura A. 2019. Inhibition of FLT1 ameliorates muscular dystrophy phenotype  
921 by increased vasculature in a mouse model of Duchenne muscular dystrophy. *PLOS Genet*  
922 **15**:e1008468. doi:10.1371/journal.pgen.1008468
- 923 Vieira NM, Elvers I, Alexander MS, Moreira YB, Eran A, Gomes JP, Marshall JL, Karlsson EK,  
924 Verjovski-Almeida S, Lindblad-Toh K, Kunkel LM, Zatz M. 2015. Jagged 1 Rescues the  
925 Duchenne Muscular Dystrophy Phenotype. *Cell* **163**:1204–1213.  
926 doi:10.1016/j.cell.2015.10.049
- 927 Wagner PD, Olfert IM, Tang K, Breen EC. 2006. Muscle-targeted deletion of VEGF and  
928 exercise capacity in mice. *Respir Physiol Neurobiol* **151**:159–166.  
929 doi:10.1016/j.resp.2005.09.007
- 930 Xin C, Chu X, Wei W, Kuang B, Wang Y, Tang Y, Chen J, You H, Li C, Wang B. 2021.  
931 Combined gene therapy via VEGF and mini-dystrophin synergistically improves  
932 pathologies in temporalis muscle of dystrophin/utrophin double knockout mice. *Hum Mol*  
933 *Genet.* **30**:1349-1359. doi: 10.1093/hmg/ddab120.
- 934 Yan G, Yan R, Chen C, Chen C, Zhao Y, Qin W, Veldman MB, Li S, Lin S. 2019. Engineering  
935 vascularized skeletal muscle tissue with transcriptional factor ETV2-induced autologous

- 936           endothelial cells. *Protein Cell* **10**:217–222. doi:10.1007/s13238-018-0542-7
- 937   Yan H, Guo Y, Zhang P, Zu L, Dong X, Chen L, Tian J, Fan X, Wang N, Wu X, Gao W. 2005.
- 938           Superior neovascularization and muscle regeneration in ischemic skeletal muscles following
- 939           VEGF gene transfer by rAAV1 pseudotyped vectors. *Biochem Biophys Res Commun*
- 940           **336**:287–298. doi: 10.1016/j.bbrc.2005.08.066
- 941   Young MD, Behjati S. 2020. SoupX removes ambient RNA contamination from droplet based
- 942           single-cell RNA sequencing data. *bioRxiv* 303727. doi:10.1101/303727
- 943   Yue L, Wan R, Luan S, Zeng W, Cheung TH. 2020. Dek Modulates Global Intron Retention
- 944           during Muscle Stem Cells Quiescence Exit. *Dev Cell* **53**:661-676.e6.
- 945           doi:10.1016/j.devcel.2020.05.006
- 946   Zhang MJ, Ntranos V, Tse D. 2020. Determining sequencing depth in a single-cell RNA-seq
- 947           experiment. *Nat Commun* **11**:1–11. doi:10.1038/s41467-020-14482-y
- 948
- 949

950 **Figure Legends**

951

952 **Figure 1. EC gene signal including VEGF receptor genes in MuSCs.**

953 A) Experimental schema for bulk and single cell sequencing from the  
954 *Pax7<sup>CreERT2</sup>:R26R<sup>tdT</sup>:Flk1<sup>GFP</sup>* mice. Bulk sequencing performed on MuSCs, ECs and  
955 single muscle fibers (SMFs) from uninjured muscle. FACS sorted MuSCs and ECs from  
956 uninjured and regenerating TA muscle (3 days following CTX) were run separately on  
957 the 10X single cell platform and aggregated.

958 B) Bulk RNAseq showing EC signature in MuSCs. Subset dividing genes that are  
959 commonly used to delineate cell identity for MuSCs, ECs and SMFs. Last column shows  
960 genes that define macrophages (M $\phi$ ), which should not be highly expressed in any of our  
961 cell types. Red dots indicate MuSCs, green dots indicate ECs and blue dots indicate  
962 SMFs.

963 C) UMAP from aggregated single cell RNAseq shows expression of different phases of  
964 MuSCs (quiescent MuSCs, activated MuSCs and myoblasts), ECs (tip ECs and ECs) and  
965 from likely contaminant cells such as macrophages (M $\phi$ ) and smooth muscle cells  
966 (SMC).

967 D) UMAP from aggregated data visualized by sample day showing MuSCs segregated by  
968 the sample day but overlap in the EC population. Red dots indicate intact (day 0) and  
969 blue dots indicate 3 days following CTX.

970 E) Expression of quality control genes such as *eGFP*, *tdTomato*, *CreERT2* and EC genes  
971 such as *Cdh5*, *Kdr* and *Flt1*.

- 972 F) Genome browser tracks of whole muscle and TU-tagged MuSC nascent RNA  
973 (GSE97399, Velthoven et al., 2017). *Kdr* and *Pecam1* expression can be found in the  
974 MuSC fraction. As control, *Myh1* is highly expressed in the whole muscle preparation but  
975 largely absent in the MuSC fraction. *Sdc4* and *Calcr* are highly expressed in MuSC and  
976 less so in the whole muscle fraction.
- 977 G) qPCR for *Kdr*, *Flt1*, *Nrp1* and *Nrp2* in EC lines (B.end3 and C166), muscle cell line  
978 (C2C12) and MuSC-derived myoblasts in growth and differentiation medium (DM)  
979 shows low level expression of VEGFRs and VEGF co-receptors.
- 980 H) RNAScope of *Flt1* on freshly isolated single muscle fibers from *Pax7<sup>tdT</sup>* mice shows *Flt1*  
981 expression (green) and tdTomato (red) in MuSCs. Nuclei were counterstained with DAPI  
982 (blue). Scale bar indicates 5  $\mu$ m.
- 983 I) Immunostaining for PECAM1, VE-cadherin (VE-Cad), VEGFA co-receptors (NRP1 and  
984 NRP2) and VEGFA receptors (FLT1 and FLK1) in B.End3 EC cell line and MuSC-  
985 derived myoblasts (MB). Nuclei were counterstained with DAPI (blue). Scale bar  
986 indicates 20  $\mu$ m.

987

988 **Figure 2. VEGFA-FLT1-AKT1 axis controls apoptosis in MuSC *in vitro*.**

- 989 A) Immunostaining for VEGFA (green) in MuSC-derived myoblasts. Nuclei were  
990 counterstained with DAPI (blue). Scale bar indicates 20  $\mu$ m.
- 991 B) Experimental scheme for assessing apoptosis following thapsagargin induction in  
992 myoblast culture.
- 993 C) Decreased cell survival in myoblast *in vitro* as VEGFA is blocked using FLT1-FC (a  
994 VEGFA trap). This phenotype is partially rescued with exogenous VEGFA (50 ng/ml).

- 995 D) Graphical representation of the VEGF pathway inhibitors used in panel D.
- 996 E) Following thapsagargin induction, apoptotic and necrotic cells are increased with  
997 inhibition of FLT1 via FLT1-FC or anti-FLT1 antibody (anti-FLT1 mAb) but not FLK1  
998 (SU5402 and ZM306416) or NRP1-FLK1 inhibition (EG00229) following exogenous  
999 VEGFA (50 ng/ml).
- 1000 F) 4-OHT induced deletion of *Flt1* in *Pax7<sup>+/CreER</sup>:Flt1<sup>Loxp/Loxp</sup>* myoblasts is sufficient to  
1001 reduce cell survival in myoblast without induction of apoptosis.
- 1002 G) Cell survival is decreased *in vitro* in myoblast with thapsagargin induction following 4-  
1003 OHT mediated deletion of *Flt1* in *Pax7<sup>+/CreER</sup>:Flt1<sup>Loxp/Loxp</sup>* myoblast that is not rescued by  
1004 exogenous VEGFA. Blue indicates *MuSC-Flt1<sup>+/+</sup>*, red indicates *MuSC-Flt1<sup>+/+</sup>* with 50  
1005 ng/ml VEGFA, green indicates *MuSC-Flt1<sup>Δ/Δ</sup>* and purple indicates *MuSC-Flt1<sup>Δ/Δ</sup>* with 50  
1006 ng/ml VEGFA.
- 1007 H) Representative images of pAKT (red) in myoblast stained by MyoD (green) in *MuSC-*  
1008 *Flt1<sup>+/+</sup>* and *MuSC-Flt1<sup>Δ/Δ</sup>* myoblasts induced with exogenous VEGFA. Nuclei were  
1009 counterstained with DAPI (blue). Scale bar indicates 50 μm.
- 1010 I) Quantification of pAKT in myoblasts stained by MyoD in *MuSC-Flt1<sup>+/+</sup>* and *MuSC-*  
1011 *Flt1<sup>Δ/Δ</sup>* myoblast induced w/wo exogenous VEGFA. VEGFA induction increases pAKT  
1012 in *MuSC-Flt1<sup>+/+</sup>* myoblasts but this response is lost in *MuSC-Flt1<sup>Δ/Δ</sup>* myoblasts.
- 1013 J) Annexin V quantification of myoblasts transfected with myr-AKT and E4ORF1 to  
1014 activate AKT1 showed increased cell survival of myoblasts following apoptosis  
1015 induction.
- 1016 K) Representative model for VEGFA-FLT1-AKT axis-mediated MuSC survival.
- 1017

1018 **Figure 3. MuSC-derived *VEGFA* and *Flt1* requires proper skeletal muscle.**

- 1019 A) Experimental schema detailing the experiments performed in this figure. The  
1020 *Pax7<sup>+/CreER</sup>:R26R<sup>tdT</sup>:VEGFA<sup>+/Hyper</sup>* (*VEGFA<sup>+/Hyper</sup>*) *Pax7<sup>+/CreER</sup>:R26R<sup>tdT</sup>:VEGFA<sup>Loxp/Loxp</sup>*  
1021 for *MuSC-VEGFA<sup>Δ/Δ</sup>* and *Pax7<sup>tdT</sup>:Flt1<sup>Loxp/Loxp</sup>* for *MuSC-Flt1<sup>Δ/Δ</sup>* lines were pulsed with  
1022 tamoxifen (TMX) prior to investigation.
- 1023 B) Representative H&E-stained images for intact and on 14-day post injury TA muscle from  
1024 *MuSC-VEGFA<sup>+/Hyper</sup>*, *MuSC-Flt1<sup>Δ/Δ</sup>* and *MuSC-VEGFA<sup>Δ/Δ</sup>* mice and their representative  
1025 controls. Scale bar indicates 50 μm.
- 1026 C) Annexin V staining show less necrotic cells in MuSC from *VEGFA<sup>+/Hyper</sup>* mice compared  
1027 with the control one day following injury.
- 1028 D) Quantification of MuSCs from single muscle fibers show increased MuSCs in  
1029 *VEGFA<sup>+/Hyper</sup>* EDL muscle compared with the control mice at base line and 14 days post  
1030 injury.
- 1031 E) Fiber size distribution and F) mean feret's diameter of uninjured and regenerating muscle  
1032 14 days post injury from *VEGFA<sup>+/Hyper</sup>* and control mice show no difference at baseline  
1033 but an increase in fiber diameter following injury.
- 1034 G) Annexin V staining show increased dead cells in MuSCs from *MuSC-VEGFA<sup>Δ/Δ</sup>* mice  
1035 one day following CTX compared with the control *MuSC-VEGFA<sup>+/+</sup>* mice.
- 1036 H) Quantification of MuSCs from single muscle fiber at base line and 14 days post injury.
- 1037 I) Fiber size distribution and J) mean feret's diameter of uninjured and regenerating muscle  
1038 14 days post injury from *MuSC-VEGFA<sup>Δ/Δ</sup>* and *MuSC-VEGFA<sup>+/+</sup>* mice show no  
1039 difference at baseline but a decrease in fiber diameter following injury.

- 1040 K) Annexin V staining show increased apoptosis in MuSCs from *MuSC-Flt1<sup>Δ/Δ</sup>* mice one  
1041 day following injury compared with the control *MuSC-Flt1<sup>+/+</sup>* mice.
- 1042 L) Quantification of MuSCs from single muscle fiber show decreased MuSCs in *MuSC-*  
1043 *Flt1<sup>Δ/Δ</sup>* EDL muscle at base line and 14 days post injury compared with the control  
1044 *MuSC-Flt1<sup>+/+</sup>* mice.
- 1045 M) Fiber size distribution and N) mean feret's diameter of uninjured and regenerating muscle  
1046 from *MuSC-Flt1<sup>Δ/Δ</sup>* and compared with the control *MuSC-Flt1<sup>+/+</sup>* mice show no  
1047 difference at baseline but a decrease in fiber diameter following injury.

1048

1049 **Figure 4. VEGFA-FLT1 pathway in MuSCs regulates muscle pathology in DMD model**  
1050 **mice.**

- 1051 A) Experimental schema detailing the experiments performed in this figure. The  
1052 *mdx:Pax7<sup>tdT</sup>:Flt1<sup>Loxp/Loxp</sup>* was pulsed with tamoxifen (TMX) to generate *mdx:MuSC-*  
1053 *Flt1<sup>Δ/Δ</sup>* mice prior to investigation. *mdx:VEGFA<sup>+ /Hyper</sup>* mouse line was used without any  
1054 induction.
- 1055 B) Representative H&E and Sirius red stain from *mdx:MuSC-Flt1<sup>+/+</sup>* and *mdx:MuSC-Flt1<sup>Δ/Δ</sup>*  
1056 mouse TA muscle at 3 months of age. Scale bar indicates 50 μm.
- 1057 C) Smaller average fiber size in *mdx:MuSC-Flt1<sup>Δ/Δ</sup>* compared with the control *mdx:MuSC-*  
1058 *Flt1<sup>+/+</sup>* mouse TA muscle.
- 1059 D) Increased fibrotic area in *mdx:MuSC-Flt1<sup>Δ/Δ</sup>* compared with the control *mdx:MuSC-*  
1060 *Flt1<sup>+/+</sup>* mouse TA muscle.
- 1061 E) Decreased muscle perfusion in *mdx:MuSC-Flt1<sup>Δ/Δ</sup>* compared with the control *mdx:MuSC-*  
1062 *Flt1<sup>+/+</sup>* mouse TA muscle.



- 1063 F) Decreased grip strength normalized to body weight in *mdx:MuSC-Flt1<sup>Δ/Δ</sup>* compared with  
1064 the control *mdx:MuSC-Flt1<sup>+/+</sup>* mouse TA muscle at both 3 and 12 months of age.
- 1065 G) Representative H&E and Sirius red stain from *mdx:VEGFA<sup>+Hyper</sup>* and *mdx:VEGFA<sup>+/+</sup>*  
1066 mouse TA muscle at 3 months from TA muscle (top four panels) and diaphragm muscle  
1067 (bottom four panels).
- 1068 H) Increased average fiber size in *mdx:VEGFA<sup>+Hyper</sup>* compared with the control  
1069 *mdx:VEGFA<sup>+/+</sup>* mouse TA and diaphragm (DM) muscle. Scale bar indicates 50 μm.
- 1070 I) Decreased fibrosis in *mdx:VEGFA<sup>+Hyper</sup>* compared with the control *mdx:VEGFA<sup>+/+</sup>*  
1071 mouse TA and diaphragm (DM) muscle
- 1072 J) Muscle perfusion is increased in *mdx:VEGFA<sup>+Hyper</sup>* compared with the control  
1073 *mdx:VEGFA<sup>+/+</sup>* mouse TA muscle.
- 1074 K) Grip strength normalized to body weight is increased in *mdx:VEGFA<sup>+Hyper</sup>* compared  
1075 with the control *mdx:VEGFA<sup>+/+</sup>* mice.

# Figure 1

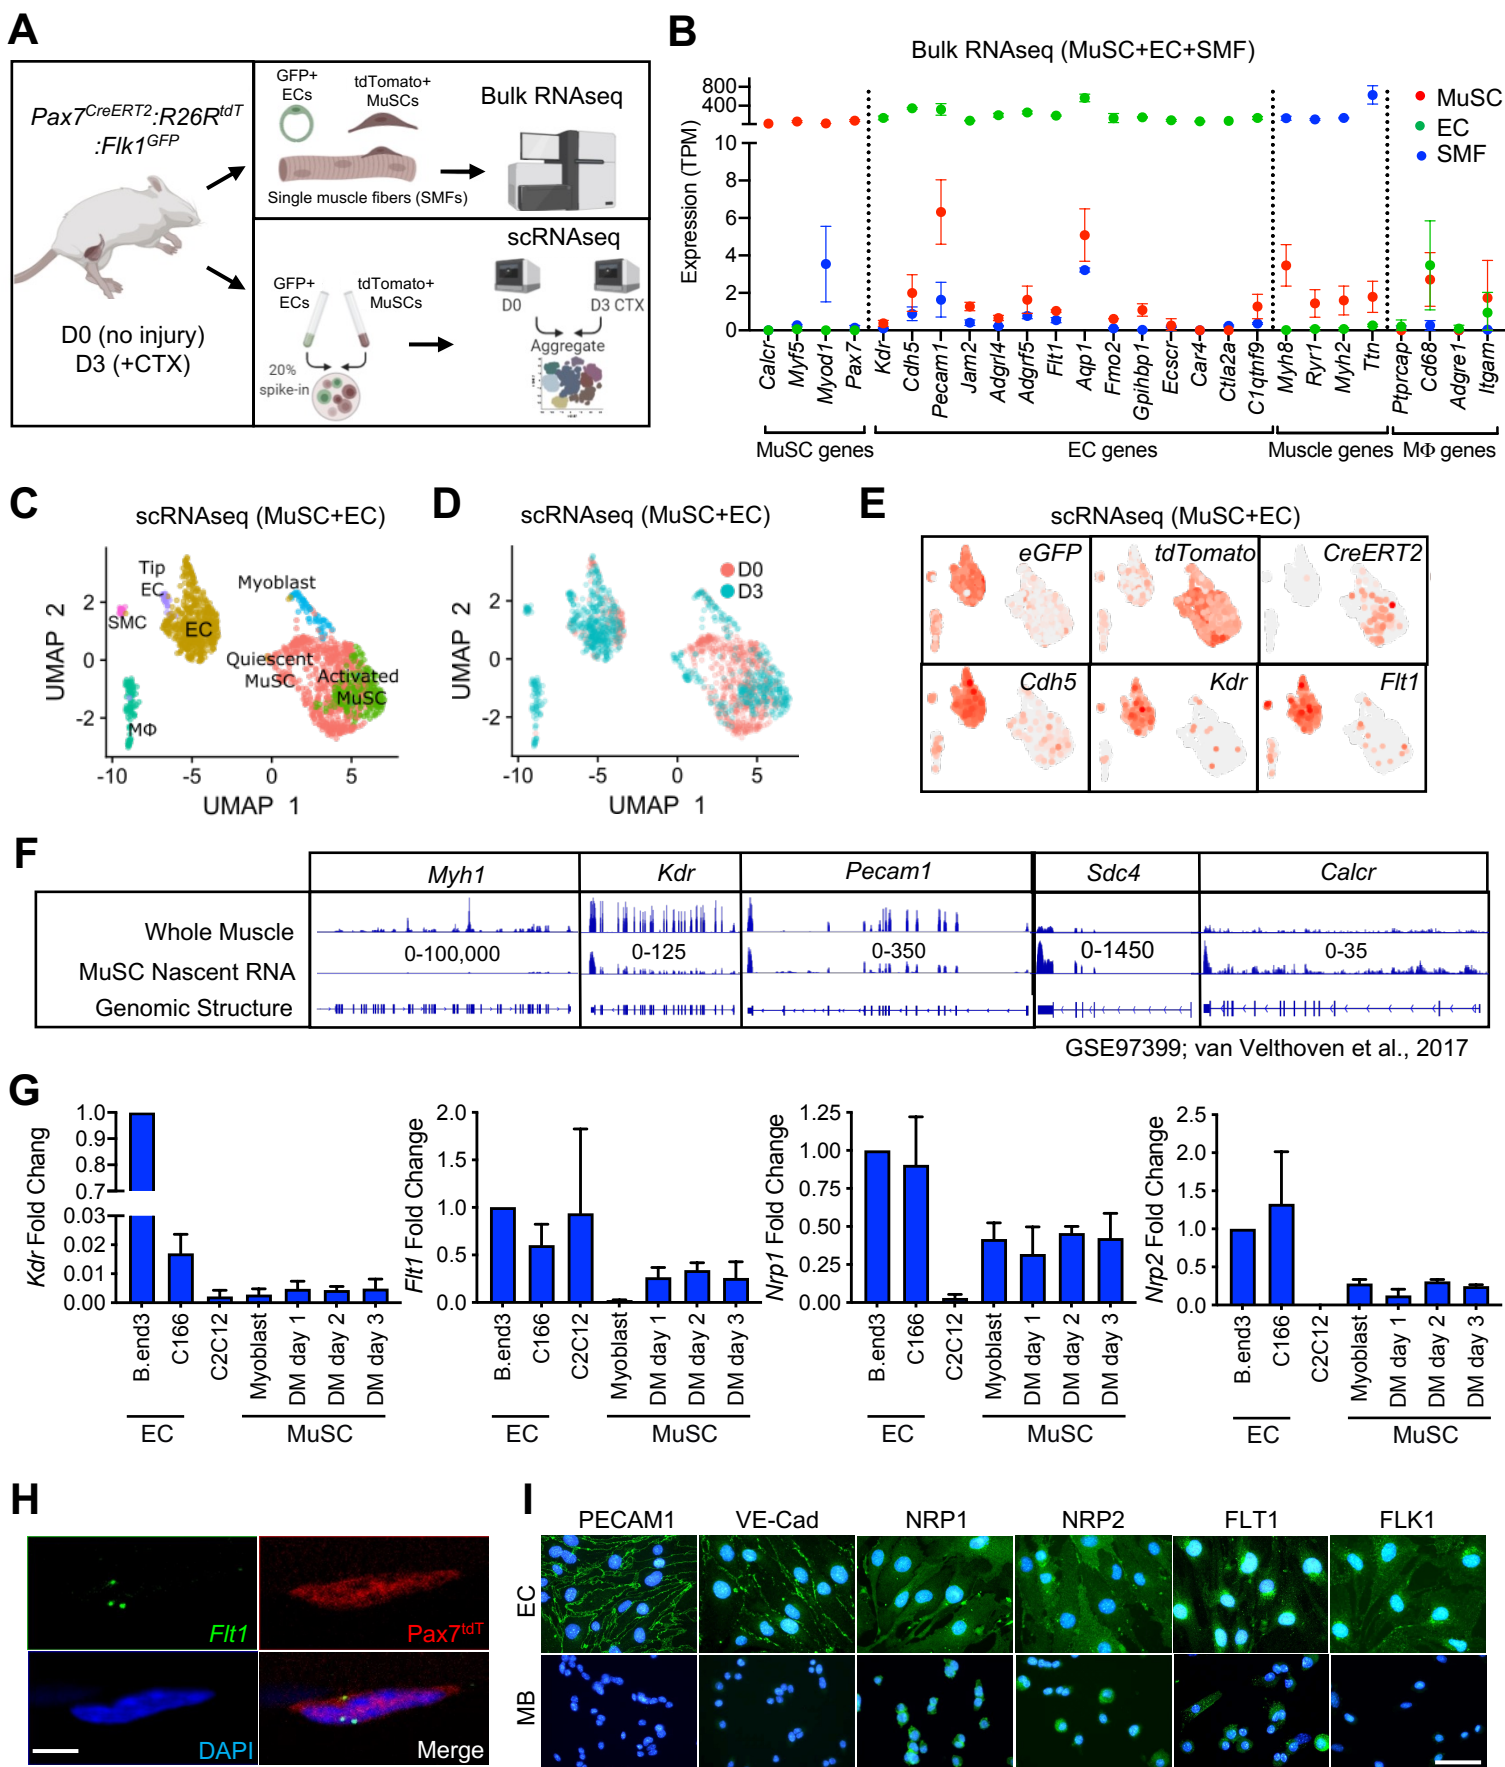

## Figure 2

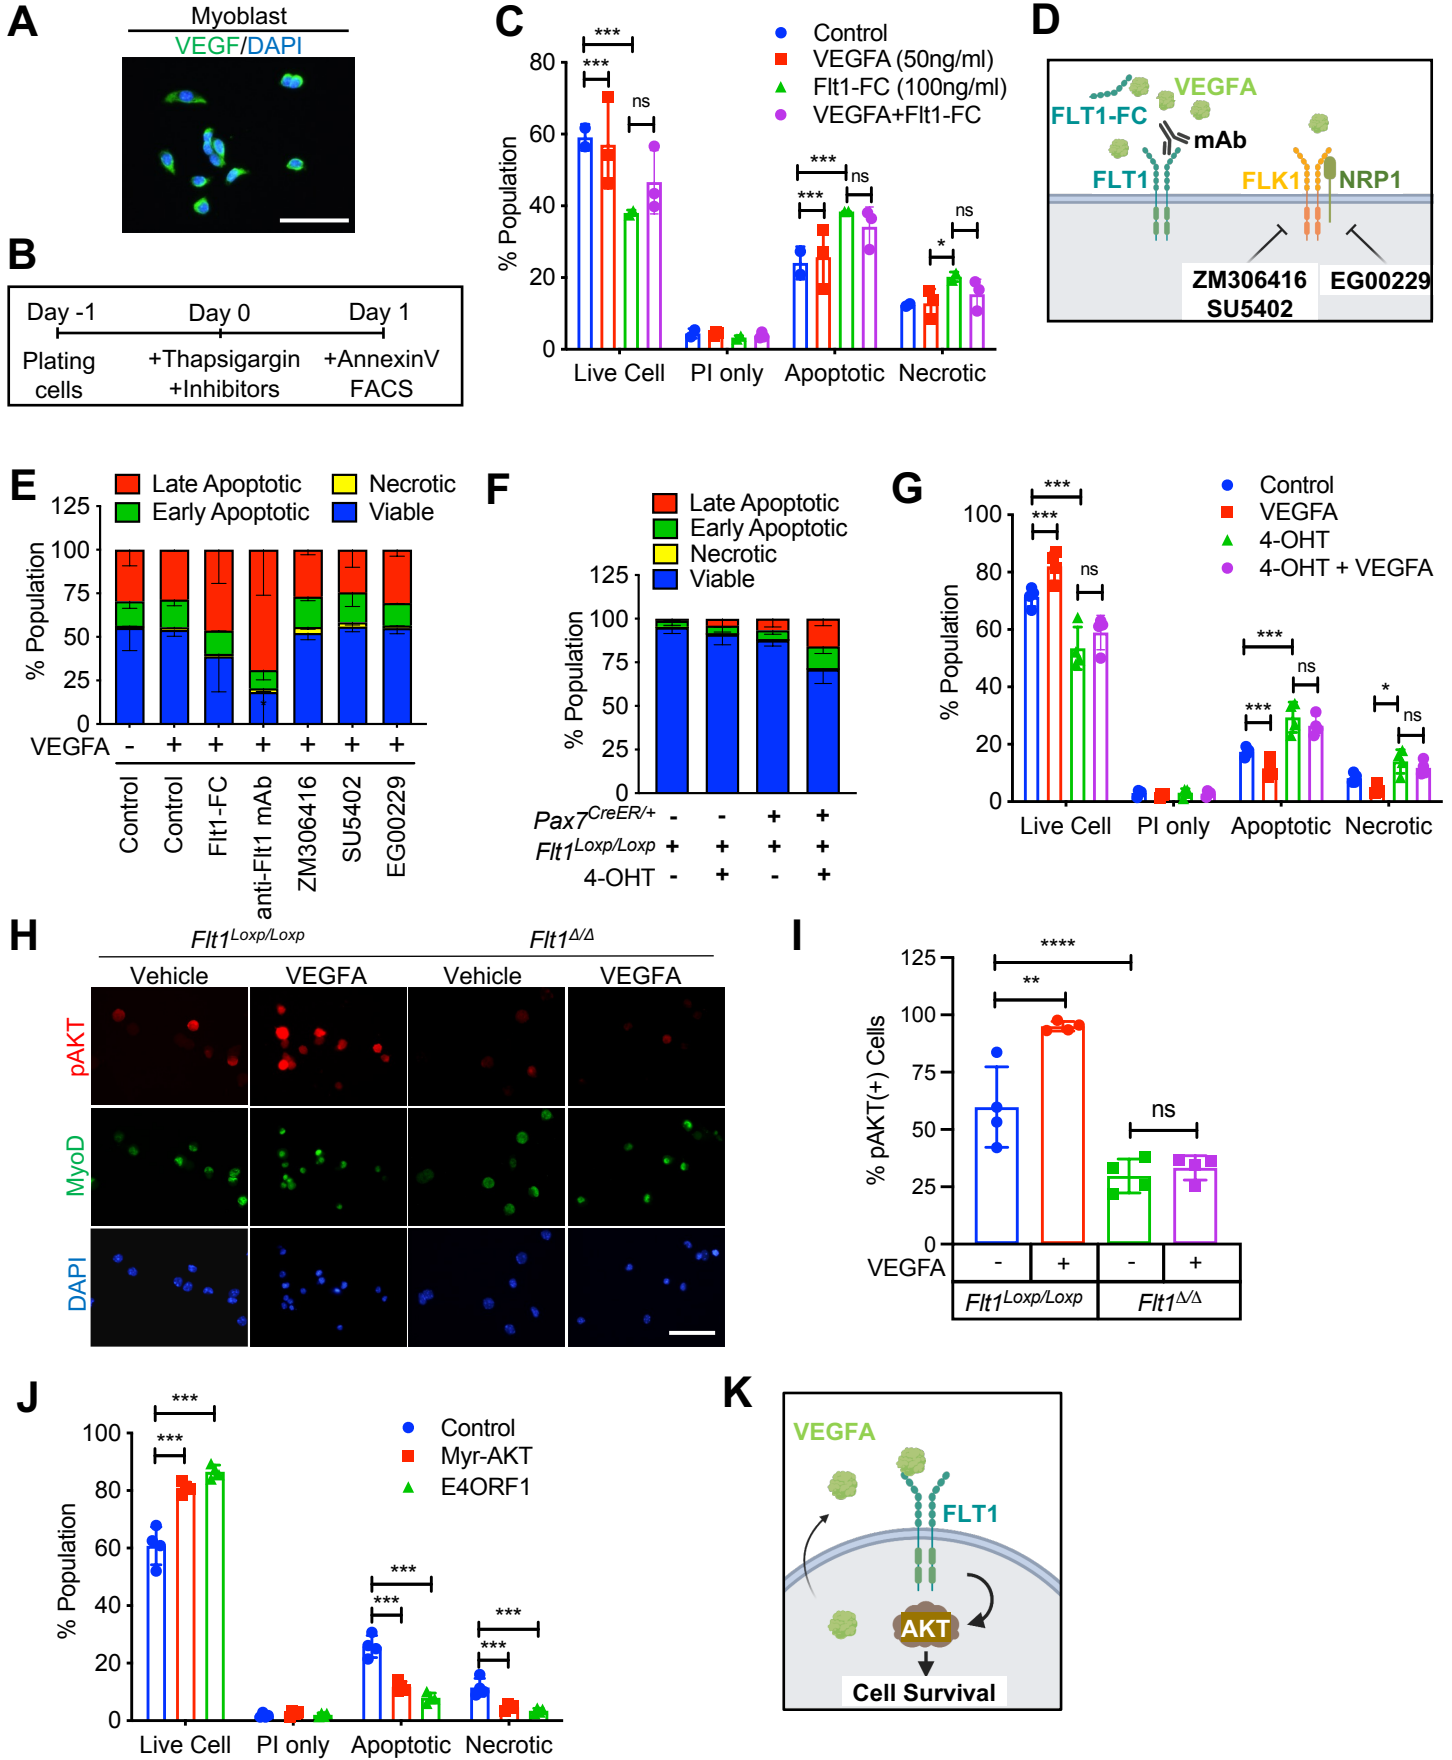

## Figure 3

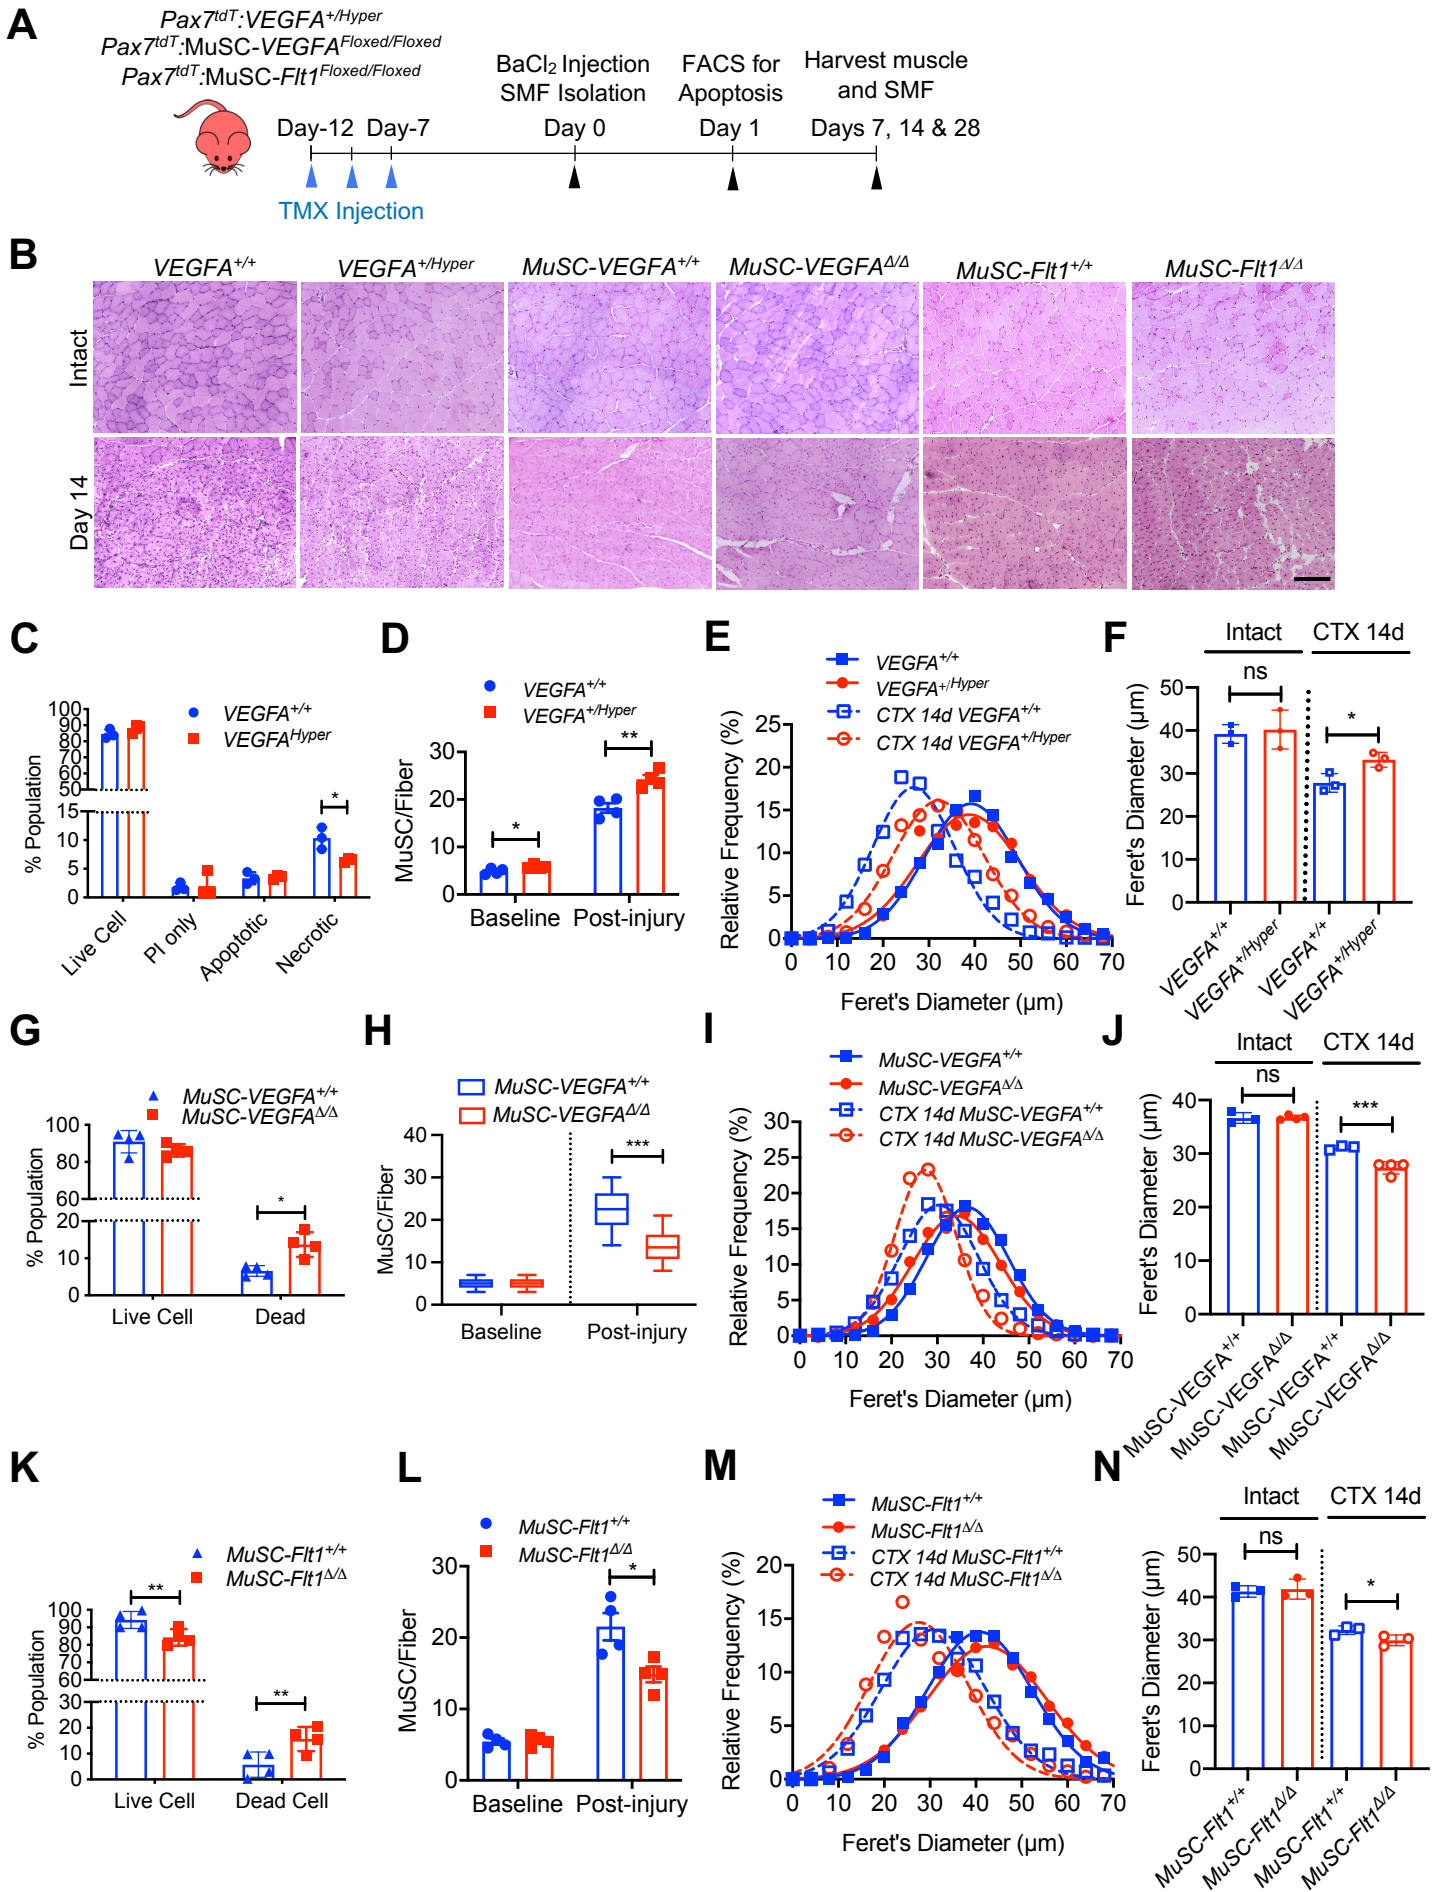

## Figure 4

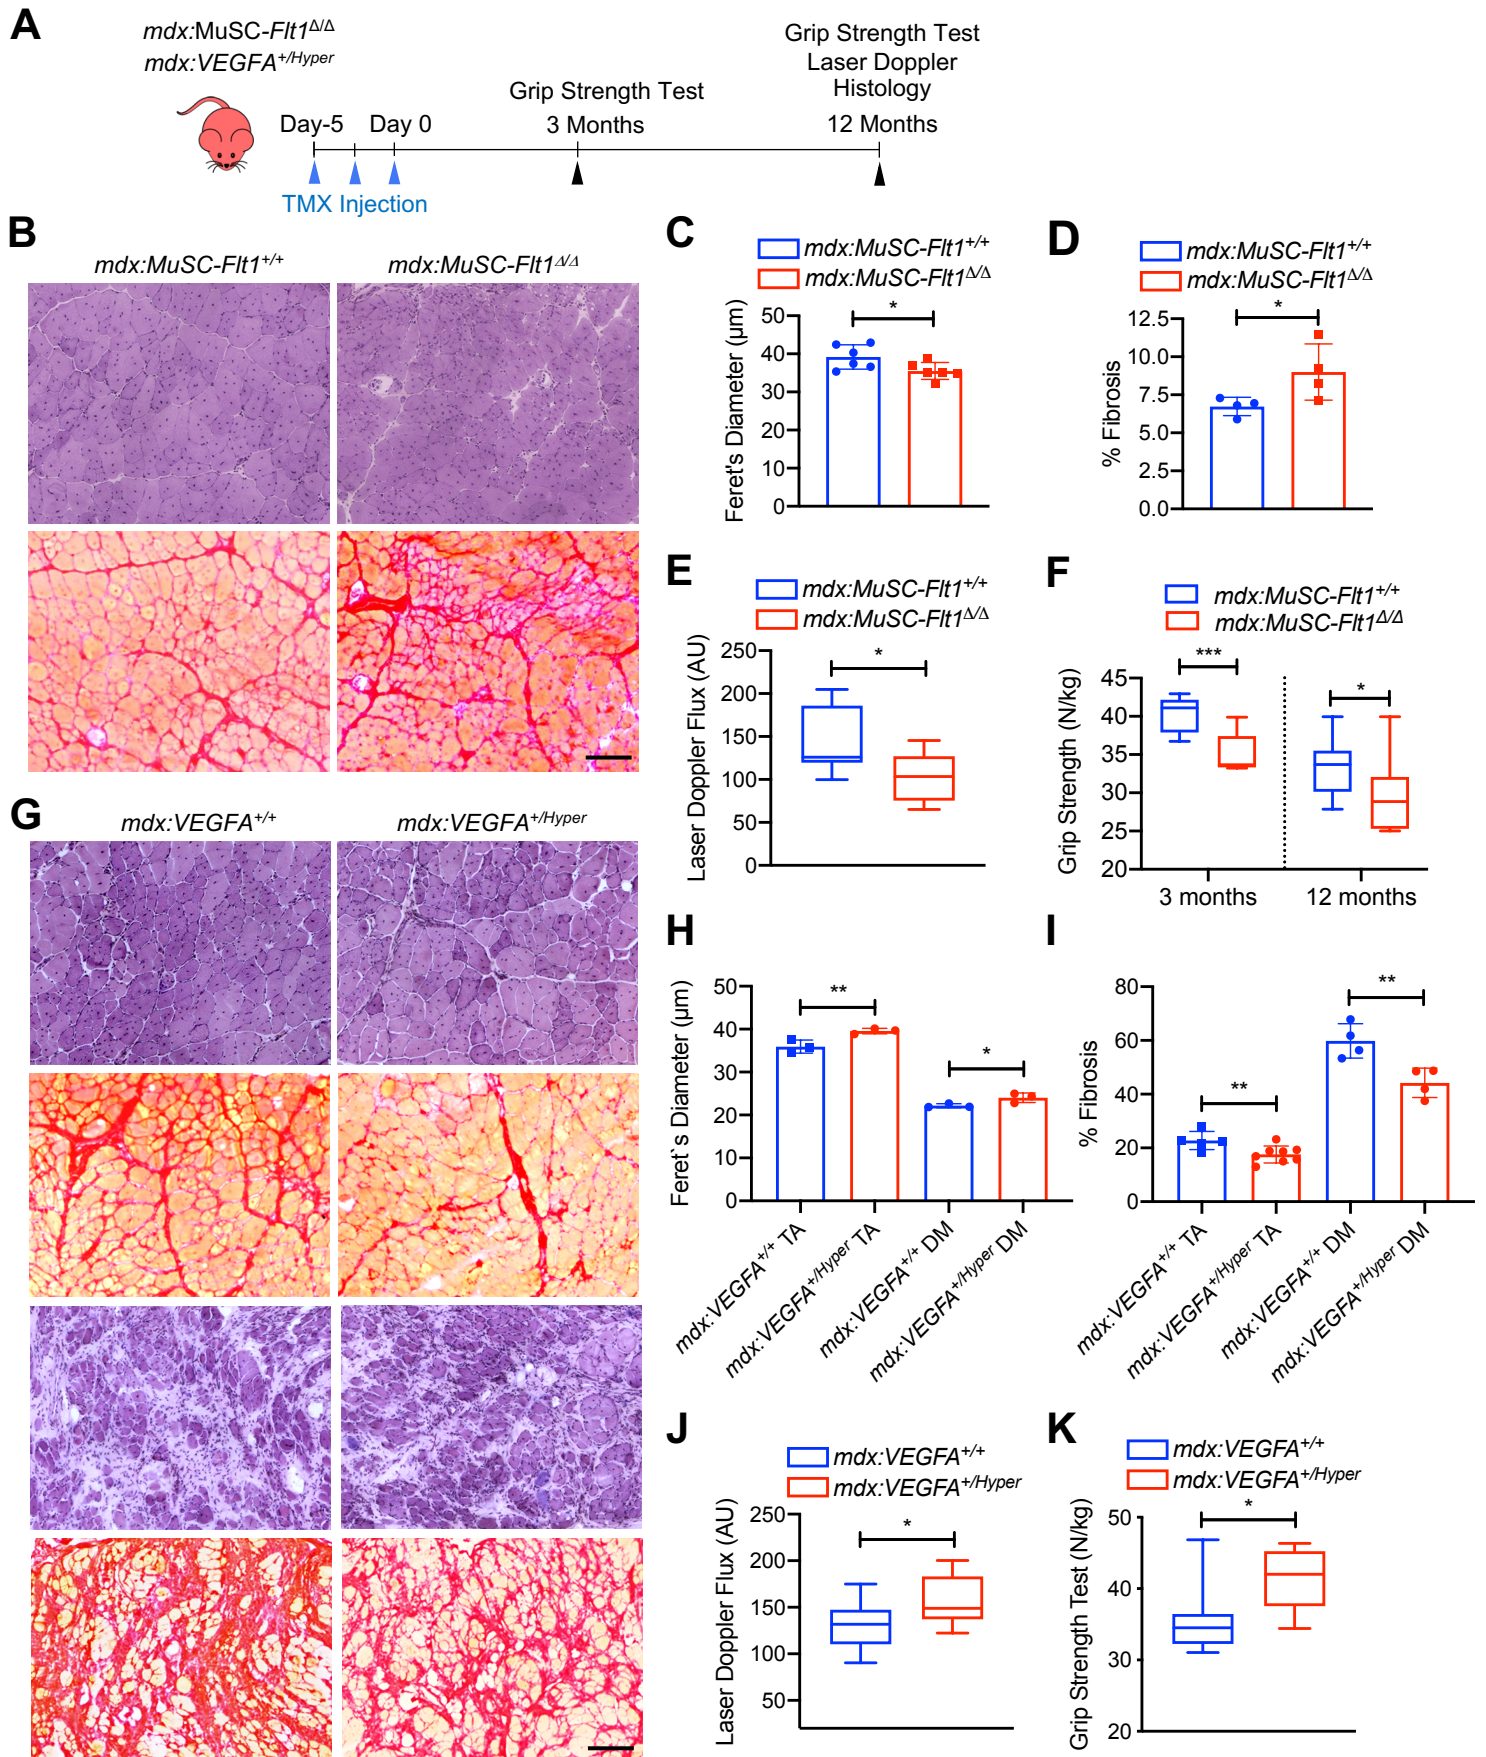

Source: http://biorxiv.org/content/10.1101/2021.08.28.458037v1.full.pdf
