1 **Endothelial cell signature in muscle stem cells validated by VEGFA-FLT1-AKT1 axis**  
2 **promoting survival of muscle stem cell**

3

4 Authors/Affiliations

5 Mayank Verma<sup>a,b,c,d</sup>, Yoko Asakura<sup>b,c,d</sup>, Xuerui Wang<sup>b,c,d</sup>, Kasey Zhou<sup>b,c,d</sup>, Mahmut Ünverdi<sup>b,c,d</sup>,

6 Allison P. Kann<sup>e,f</sup>, Robert S. Krauss<sup>e,f</sup> and Atsushi Asakura<sup>b,c,d</sup>

7

8 Department of Pediatrics & Neurology, Division of Pediatric Neurology, The University of  
9 Texas Southwestern Medical Center, TX, USA<sup>a</sup>.

10 Stem Cell Institute<sup>b</sup>, Paul & Sheila Wellstone Muscular Dystrophy Center<sup>c</sup>, Department of  
11 Neurology<sup>d</sup>, University of Minnesota Medical School, MN, USA

12 Department of Cell, Developmental, and Regenerative Biology<sup>e</sup>, and Graduate School of  
13 Biomedical Sciences<sup>f</sup>, Icahn School of Medicine at Mount Sinai, NY, USA.

14

15 Conflict of Interest

16 MV and AA are listed as inventors on a patent for anti-FLT1 antibody mediated therapy for  
17 DMD. AA received consulting fees from ShireHGT.

18

19

20

21 **Abstract**

22 Endothelial and skeletal muscle lineages arise from common embryonic progenitors. Despite  
23 their shared developmental origin, adult endothelial cells (ECs) and muscle stem cells (MuSCs)  
24 (satellite cells) have been thought to possess distinct gene signatures and signaling pathways.  
25 Here we shift this paradigm by uncovering how adult MuSC behavior is affected by the  
26 expression of a subset of EC transcripts. We used several computational analyses including  
27 single-cell RNAseq to show that MuSCs express low levels of canonical EC markers. We  
28 demonstrate that MuSC survival is regulated by one such prototypic  
29 endothelial signaling pathway (VEGFA-FLT1). Using pharmacological and genetic gain- and  
30 loss-of-function studies, we identify the FLT1-AKT1 axis as the key effector underlying  
31 VEGFA-mediated regulation of MuSC survival. All together, our data support that the VEGFA-  
32 FLT1-AKT1 pathway promotes MuSC survival during muscle regeneration, and highlights how  
33 the minor expression of select transcripts is sufficient for affecting cell behavior.

34

35

## 36 **Introduction**

37 Skeletal muscle and endothelial cells (ECs) and their progenitors from the trunk and limbs are  
38 derived from the somites during early developments. Previous works demonstrated the existence  
39 of bipotent progenitors which express both Pax3 and FLK1 (Eichmann et al., 1993; Ema et al.,  
40 2006; Esner et al., 2006; Kardon et al., 2002; Tozer et al., 2007). These bipotent progenitors  
41 migrate into trunk and limb buds from ventrolateral region of the somites to generate MyoD(+)  
42 myogenic cells followed by skeletal muscle and PECAM1(+) ECs followed by vasculatures  
43 (Hutcheson and Kardon, 2009; Kardon et al., 2002; Lagha et al., 2009; Mayeuf-Louchart et al.,  
44 2014; Mayeuf-Louchart et al., 2016). In addition, FLK1(+) cells give rise to myogenic cells  
45 during development and oncologic transformation (Drummond and Hatley, 2018; Mayeuf-  
46 Louchart et al., 2014; Motoike et al., 2003). Lastly, multipotent mesoangioblasts, vessel-  
47 associated stem cells, have been identified in embryonic dorsal aorta (Minasi et al., 2002). These  
48 cells are able to differentiate into several types of mesodermal tissues including skeletal muscle  
49 and ECs (Roobrouck et al., 2011). Interestingly, these myogenic cells show the same  
50 morphology as muscle satellite cells (MuSCs), stem cell populations for skeletal muscle, and  
51 express a number of myogenic and EC markers such as MyoD, M-cadherin, FLK1 and VE-  
52 cadherin (De Angelis et al., 1999). However, it is not clear whether adult MuSCs derived from  
53 these bipotent progenitors still maintain canonical EC signals. Curiously, blood vessel-associated  
54 myoendothelial cell progenitors that express both myogenic and EC markers, and are able to  
55 differentiate into myogenic cells following transplantation have been identified in the interstitial  
56 spaces of both murine and human adult skeletal muscle (Tamaki et al., 2002; Zheng et al., 2007;  
57 Huang et al., 2014). However, the relationship between these myoendothelial cell progenitors  
58 and MuSCs remains unclear.

59

60           Vascular endothelial growth factor (VEGF), specifically VEGFA modulates many  
61 biological aspects including angiogenesis through its two receptors, FLT1 and FLK1. Although  
62 FLK1 possesses stronger signaling capability and the major signaling receptor tyrosine kinase  
63 (RTK) for VEGFA, FLT1 has considerably higher affinity for VEGF but weaker cytoplasmic  
64 signaling capability. In normal tissue, FLT1 acts as a decoy receptor and a sink trap for VEGF  
65 thereby preventing excessive normal and pathological angiogenesis. In addition, there are two  
66 co-receptors for VEGFA (NRP1 and NRP2) that function with FLK1 to modulate VEGFA  
67 signaling. While VEGF signaling has been extensively studied for its role in development,  
68 proliferation, and survival of endothelial cells (ECs), its role in non-vascular systems such as  
69 neuron and bone has only recently been appreciated (Liu et al., 2012; Okabe et al., 2014; Poesen  
70 et al., 2008). Skeletal muscle tissue is the most abundant producer of VEGFA in the body. It has  
71 already been extensively studied in the skeletal muscle fibers in models of *Vegfa* knockout mice  
72 (Olfert et al., 2009; Tang et al., 2004; Wagner et al., 2006) as well as *Vegfa* overexpression  
73 (Arsic et al., 2004; Bouchentouf et al., 2008; Messina et al., 2007; Yan et al., 2005).

74           Adult skeletal muscle also contains the tissue resident muscle stem cell population,  
75 termed MuSCs, which mediate postnatal muscle growth and muscle regeneration (Motohashi and  
76 Asakura, 2014). After muscle injury, quiescent MuSCs initiate proliferation to produce myogenic  
77 precursor cells, or myoblasts. The myoblasts undergo multiple rounds of cell division before  
78 terminal differentiation and formation of multinucleated myotubes by cell fusion. Importantly,  
79 the MuSC-derived myoblasts also express VEGFA, which has been shown to increase the  
80 proliferation of myoblasts (Christov et al., 2007). Our data obtained from genetical model mice  
81 demonstrated that MuSCs express abundant VEGFA, which recruits ECs to establish vascular

82 niche for MuSC self-renewal and maintenance (Verma et al., 2018). In addition, VEGFA and its  
83 receptors are expressed in the myoblast cell line, C2C12 cells, and the signaling can induce cell  
84 migration and protect apoptotic cell during myogenic differentiation *in vitro* (Bryan et al., 2008;  
85 Germani et al., 2003; Mercatelli et al., 2010). However, it is not clear whether MuSCs also  
86 express VEGF receptors and if cell-autonomous VEGFA signaling plays an essential roles in  
87 MuSC function during muscle regeneration *in vivo*.

88 We have previously shown that *Flt1* heterozygous gene knockout and conditional  
89 deletion of *Flt1* in ECs display increased capillary density in skeletal muscle, indicating the  
90 essential roles for *Flt1* in adult skeletal muscle. More importantly, when crossed with the  
91 Duchenne muscular dystrophy (DMD) model *mdx* mice, these mice show both histological and  
92 functional improvements of their dystrophic phenotypes. This was due to the effect of increased  
93 ECs leading to an increase in MuSCs (Verma et al., 2010; Verma et al., 2019). However, the  
94 effect of VEGFA on MuSC *in vivo* remained unknown. We found that MuSCs express low levels  
95 of canonical EC markers including VEGF receptors using single cell transcriptomics. Therefore,  
96 we examined the effects of VEGFA on MuSCs and show that it has a drastic effect on cell  
97 survival in the via its receptor FLT1 by signaling through AKT1.

98

## 99 **Results**

### 100 **EC gene signal including *Vegf* receptors in MuSCs**

101 EC signatures in MuSCs has been seen in several gene expression data sets (Figure S1A-D,  
102 Table S1) (Fukada et al., 2007; Ryall et al., 2015; van Velthoven et al., 2017; Yue et al., 2020).  
103 However, with the lack of EC control, we questioned whether these were true expression or  
104 artifact. To isolate EC and MuSC populations, we first crossed the *Flk1*<sup>+GFP</sup> mice to label the

105 ECs of the vasculature (Ema et al., 2006) and the *Pax7<sup>+/CreERT2</sup>:ROSA26<sup>+/Loxp-stop-Loxp-tdTomato</sup>*

106 (*Pax7<sup>+/CreERT2</sup>:R26R<sup>+/tdT</sup>*) mice to mark the MuSC lineage (Murphy et al., 2011; Verma et al.,

107 2018). We performed bulk RNA sequencing (RNAseq) on FACS sorted ECs and MuSCs as well

108 as freshly isolated single muscle fibers (Figure 1A, S1E-G). We found that single muscle fibers

109 routinely have ECs fragments attached to the fiber (Figure S1G) and so we removed such fibers

110 based of Flk1<sup>GFP</sup> expression from the samples collected for sequencing. We surveyed for

111 canonical genes for each cell type (Figure 1B) and found minimal but reliable expression of

112 canonical ECs genes such as *Pecam1*, *Cdh5*, *Kdr*, and *Flt1* in MuSCs.

113 It is possible that these EC signatures detecting in MuSCs were not due to small amounts

114 of contaminating ECs with very high expression of the canonical EC genes skewing the average

115 expression in MuSC RNA samples. To rule out this possibility, we performed single cell

116 RNAseq (scRNAseq) on MuSCs and ECs isolated from mouse hind limb muscle from both basal

117 condition and 3-days post injury to look at both quiescent and activated MuSCs from the reporter

118 mice specified above (Figure 1A). We could reliably delineate injured and activated MuSCs via

119 side and forward scatter (Figure S1H, S1I). We FACS isolated cells from both days separately

120 and spiked in 20% of the ECs into the MuSCs, and performed scRNAseq for each time point

121 (Figure 1A). We performed sequencing with ~300K read/cell compared with the commonly used

122 sequencing with 60K reads/cell, in order to maximize the possibility of detecting low abundance

123 transcripts (Zhang et al., 2020). In the aggregated dataset, the MuSCs showed low overlap

124 between D0 and D3 owing to the different stages of the myogenic differentiation cycle, while the

125 ECs clusters showed near perfect overlap (Figure 1C, 1D). While drastic morphological changes

126 in ECs have been shown during muscle regeneration (Hardy et al., 2016), transcriptomic changes

127 are much more tapered, especially compared with MuSCs (Latroche et al., 2017). We were able

128 to deconvolve the quiescent MuSCs from the activated and differentiating MuSCs, ECs, and  
129 other cell types from gene signatures. (Figure S1J). We also introduced an artificial chromosome  
130 loci in our sequencing reference genome to allow for mapping of custom genes such as *eGFP-*  
131 *SV40* and *tdTomato-WPRE-BGHPolyA* transgenes and were able to confirm high expression of  
132 these genes to their respective clusters (Figure 1E). Importantly, data from scRNAseq were able  
133 to recapitulate the minimal expression of canonical EC genes in the MuSC clusters such as *Cdh5*  
134 (Figure 1E) as seen in our Bulk RNAseq results (Figure 1B). These included the *Vegf receptors*  
135 *Flk1 (Kdr)* and *Flt1* (Figure 1E).

136 As a quality control measure, we mapped parts of the three transgene genes, *eGFP* from  
137 *Flk1<sup>+GFP</sup>*, and *tdTomato* and *CreERT2* from *Pax7<sup>+CreERT2</sup>:R26R<sup>+tdT</sup>* that can be detected in ECs  
138 and MuSCs, respectively, as expected (Figure S1L). Surprisingly, we also found *eGFP* in the  
139 MuSCs and *tdTomato* in EC fraction, while the *CreERT2* expression remained mainly restricted  
140 to the MuSCs (Figure S1K). FACS analysis and FACS-sorted cells confirmed that GFP(+) and  
141 tdTomato(+) cells are exclusively restricted as ECs and MuSCs, respectively (Figure S1E, S1F).  
142 Therefore, we hypothesized that this was due to the ambient free mRNA from the digested cells  
143 that is intrinsic to any droplet based single cell sequencing platform. By using SoupX (Young  
144 and Behjati, 2020), we performed careful background subtraction using genes expressed  
145 exclusively in myofibers as our negative control and genes validated by *in situ* hybridization as a  
146 positive control (Figure S1K) (Kann and Krauss, 2019). We observed decreased but sustained  
147 *eGFP* expression in the MuSC fraction and *tdTomato* expression in the EC fraction after SoupX  
148 subtraction (Figure S1K). In addition, the EC signatures such as *Cdh5* expression in the MuSC  
149 fraction was also sustained. These results conclude that MuSCs contain mRNAs from canonical

150 ECs genes. We showed that the canonical EC genes were broadly expressed in the myogenic  
151 cells in our dataset (Figure 1E).

152         Since detection of rare subpopulation in single cell dataset is a factor of cell numbers, we  
153 re-analyzed previously published dataset with 2,232 myogenic cells across different states (Torre  
154 et al., 2018; De Micheli et al., 2020). We were able to classify cell as quiescent, proliferative vs.  
155 differentiating states based on the expression of *Calcr*, *Cdk1* and *Myog*, respectively (Figure  
156 S1L). We noticed that EC prototypic markers such as *Flt1* are broadly expressed with small  
157 amounts in MuSCs. Complementary data from different laboratories showed the clear expression  
158 of EC prototypic markers such as *Cdh5*, *Flt1* and *Kdr*, using microarrays and Bulk-RNAseq  
159 (Figure S1A, S1B; Fukada et al., 2007; Ryall et al., 2015). Recently, RNAseq data from fixed  
160 quiescent, early activated and late activated MuSCs show that *Flt1* may be transiently  
161 upregulated during the early activation process (Figure S1C) (Yue et al., 2020). To confirm  
162 whether the EC gene mRNAs were transcribed from MuSCs, we utilized previously published  
163 MuSC nascent RNA transcriptome from TU-tagged samples (Gay et al., 2013; van Velthoven et  
164 al., 2017). As expected, *Myh1* was represented in the whole muscle but was absent in the TU-  
165 tagged MuSCs (Figure 1F), indicating that the nascent MuSCs were devoid of cellular  
166 contamination from other cells in the muscle. Inversely, the nascent MuSC transcript was over-  
167 represented for MuSC related genes such as *Calcr* and *Sdc4*. Interestingly, we were able to detect  
168 EC genes such as *Kdr* and *Pecam1* in the TU-tagged MuSC samples indicating that they were  
169 actively transcribed by MuSCs (Figures 1F, S1D).

170         We also verified the expression of *Vegfr* genes (*Kdr*, *Flt1*, *Nrp1* and *Nrp2*) in MuSCs  
171 using RT-qPCR (Figure 1G). In addition, we verified the expression of *Flt1* by performing *in-*  
172 *situ* hybridization using RNAScope on MuSC on whole muscle fiber, which we currently believe



173 to be the gold standard for expression studies (Figure 1H). Finally, in MuSC-derived myoblasts,  
174 NRP1 and NRP2 expression was detectable with comparable intensity compared with EC cell  
175 line, while FLT1 expression was detectable with lower intensity compared with EC cell line  
176 (Figure 1I). By contrast, PECAM1, VE-Cadherin and FLK1 expression, which was clearly  
177 detected in EC cell line, was undetectable level in myoblasts. Taken together, these data indicate  
178 that there are both transcripts of these EC canonical genes and EC canonical proteins in MuSCs.

179

### 180 **VEGFA induces proliferation and cell survival but not differentiation in myoblasts**

181 Since VEGFRs were expressed in MuSCs in small amounts and their ligand, VEGFA, was  
182 highly expressed in MuSCs (Figure 2A; Verma et al., 2018), we wanted to investigate whether  
183 there were any biological effects to induction by VEGFA. We found that treatment with VEGFA  
184 could increase proliferation of MuSC-derived myoblasts at low dose but inhibit proliferation at  
185 high dose of VEGFA, a phenomenon that has been previously described in ECs (Noren et al.,  
186 2016) (Figure S2A). We saw no effect on differentiation by VEGFA as evaluated by myosin  
187 heavy chain (MyHC) staining, fusion index and RT-qPCR (Figure S2B, S2C, S2D). By contrast,  
188 crystal violet staining showed that VEGFA could significantly increase survived cell number of  
189 myoblasts following UV-mediated apoptotic cell death induction (Figure S2E, S2F). To  
190 investigate apoptosis in detail, we optimized Annexin V assay following thapsigargin-mediated  
191 endoplasmic reticulum (ER)-stress (Hirai et al., 2010) so that we could study deviation at ~ED50  
192 while still performing experiments to remove the confounding variable to proliferation from the  
193 experimental setup (Figure S2G and S2H). We had previously shown that MuSCs are the  
194 predominant cells that secrete VEGFA in skeletal muscle (Figure 2A; Verma et al., 2018) and  
195 while adding exogenous VEGFA did not improve cell survival, blocking VEGFA via a soluble

196 form of FLT1-FC increased the number of apoptotic and necrotic myoblasts *in vitro* (Figure 2C-  
197 E).

198

### 199 **VEGFA-facilitated cell survival in MuSC-derived myoblasts is mediated through FLT1**

200 To characterize the VEGF receptor responsible for the anti-apoptotic effect of VEGFA on  
201 MuSC-derived myoblasts, we used pharmacological inhibitors of the VEGF receptors (Figure  
202 2F). We used blocking antibody for the VEGF receptors FLT1 (anti-FLT1 antibody), small  
203 molecule inhibitors for FLK1 (SU4502 and ZM306416) and the FLK1 co-receptor NRP1  
204 (EG00229) following thapsigargin induction (Figure 2D). Surprisingly, inhibiting FLK1, the  
205 major signaling RTK for VEGFA, had no effect on myoblasts survival following thapsigargin  
206 induction (Figure 3E). By contrast, blocking FLT1 via blocking antibody greatly decreased the  
207 survival of myoblasts following thapsigargin induction (Figure 3E). To confirm this interesting  
208 result using genetic tools, we obtained myoblasts with *Pax7-CreER*-inducible deletion of *Flt1*  
209 mice (*Pax7<sup>+/+</sup>/CreER:Flt1<sup>Loxp/Loxp</sup>* or *MuSC-Flt1<sup>Δ/Δ</sup>*) and the control mice (*Pax7<sup>+/+</sup>:Flt1<sup>Loxp/Loxp</sup>*). *In*  
210 *vitro* 4-OHT-mediated genetic deletion of *Flt1* (*MuSC-Flt1<sup>Δ/Δ</sup>*) resulted in down-regulation of  
211 *Flt1* RNA and FLT1 protein expression (Figure S2I, S2J), and increased spontaneous apoptotic  
212 cell death even without induction of apoptosis (Figure 2F). By contrast, *Flt1* deletion did not  
213 affect cell proliferation assessed by EdU staining or myogenic differentiation assessed by MyHC  
214 staining (Figure S2K-M). When thapsigargin-induced apoptosis was induced, the *MuSC-Flt1<sup>Δ/Δ</sup>*  
215 myoblasts had increased apoptosis that was not responsive to exogenous VEGFA (Figure 2G).

216

217 **AKT signaling is involved in apoptosis of muscle stem cells.**

218 VEGFA signaling is mediated through Extracellular signal-Regulated Kinase (ERK), p38  
219 Mitogen-Activated Protein Kinase (MAPK), and Protein kinase B (AKT). In ECs, VEGFA is  
220 known to protect cells from apoptosis via AKT (Domigan et al., 2015; Lee et al., 2007).  
221 However, it is not known whether VEGFA can similarly activate AKT in MuSC-derived  
222 myoblasts. While the role of AKT has been explored in proliferation and differentiation in  
223 myoblasts, its role in apoptosis has not been well characterized (Loiben et al., 2017). We  
224 assessed for AKT activation via phosphorylated AKT (pAKT) in MuSC-derived myoblasts. We  
225 found that exogenous VEGFA could induce AKT phosphorylation (pAKT) (Figure 2H, 2I). This  
226 response was blunted in *MuSC-Flt1<sup>Δ/Δ</sup>* myoblasts and was no longer responsive to VEGFA  
227 (Figure 2H, 2I). Lastly, we wanted to confirm that AKT activation could improve myoblast  
228 survival. We infected lentiviral *EAORF1* or *MyrAKT* vectors in myoblasts (Figure 2J), both of  
229 which gene products have been shown to specifically activate AKT without activating ERK or  
230 p38 (Kobayashi et al., 2010). We found that overexpression of either of these genes improved  
231 cell survival compared with the control *in vitro* following induction of apoptosis via thapsigargin  
232 (Figure 2J). These data establish FLT1-AKT as the cascade linking VEGFA to apoptosis in  
233 MuSC-derived myoblasts during muscle regeneration (Figure 2K).

234

### 235 **VEGFA-FLT1 pathway protects MuSCs from apoptosis *in vivo***

236 Endogenous and exogenous VEGFA have been shown to regulate cell survival and protect ECs  
237 from apoptosis *in vitro* (Gerber et al., 1998; Lee et al., 2007). To assess whether additional  
238 VEGFA had an effect of MuSC behaviors *in vivo*, we used mice carrying the *VEGFA<sup>+Hyper</sup>* allele  
239 for injury-mediated tibialis anterior (TA) muscle regeneration following BaCl<sub>2</sub> injection (Figure  
240 3A, 3B) (Miquerol et al., 1999). MuSC-derived myoblasts from *Pax7<sup>+tdT</sup>:VEGFA<sup>+Hyper</sup>* mice

241 showed around 2.8 fold increased expression of *Vegfa* but not the *Vegfrs* compared with  
242 myoblasts from wild-type mice (Figure S3A). Interestingly, while treatment with VEGFA alone  
243 had no effect on apoptosis *in vitro*, the MuSCs from *Pax7<sup>+tdT</sup>:VEGFA<sup>+Hyper</sup>* mice showed  
244 decreased cell death in regenerating muscle by 1 day following BaCl<sub>2</sub> injection (Figure 3C).  
245 Consequently, single muscle fibers from *Pax7<sup>+tdT</sup>:VEGFA<sup>+Hyper</sup>* mice showed increased number  
246 of MuSCs, compared with those from *Pax7<sup>+tdT</sup>:VEGFA<sup>+/+</sup>* mice by 28 days following BaCl<sub>2</sub>  
247 injection (Figure 3D). In addition, muscle regeneration was promoted in *VEGFA<sup>+Hyper</sup>* mice in  
248 the early and late muscle repair processes as judged by fiber diameter (Figures 3B, 3E, 3F, S3B-  
249 D).

250 We then performed the reciprocal experiment to investigate the consequence of *Vegfa*  
251 loss in MuSCs *in vivo*, and utilized MuSC-specific *Vegfa* knockout mice  
252 (*Pax7<sup>+CreER</sup>:VEGFA<sup>Loxp/Loxp</sup>*). We have previously shown that vasculature in the MuSC-  
253 *VEGFA<sup>Δ/Δ</sup>* mouse muscle is perturbed and the proximity between the MuSC and EC is increased  
254 (Verma et al., 2018). However, the functional consequences of this remained unknown. We  
255 confirmed that clear downregulation of VEGFA protein in MuSC-derived myoblasts isolated from  
256 MuSC-*VEGFA<sup>Δ/Δ</sup>* mice (Figure S3E). We noticed that deletion of *Vegfa* in MuSCs in the MuSC-  
257 *VEGFA<sup>Δ/Δ</sup>* mouse muscle led to an increase in the proportion of dead MuSCs following BaCl<sub>2</sub>  
258 injection (Figure 3G). Consequently, the number of MuSCs in the MuSC-*VEGFA<sup>Δ/Δ</sup>* muscle were  
259 significantly reduced following recovery after injury (Figure 3H). There was no difference in the  
260 MuSC numbers in MuSC-*VEGFA<sup>Δ/Δ</sup>* muscle at homeostasis. In addition, the muscle had a  
261 regenerative defect as indicated by the shift in fiber size distribution and increased adipose  
262 following muscle injury (Figure 3B, 3I, 3J, S3F-H). While a limitation of this experiment is that  
263 the MuSC fusion into the fiber also deletes *Vegfa* from the fiber themselves, muscle fiber

264 specific deletion of *Vegfa* has not shown to have an effect on fiber size (Delavar et al., 2014).  
265 These data indicate that cell intrinsic VEGFA improves cell survival of MuSCs and that loss of  
266 MuSC-derived VEGFA results in reduced muscle regeneration.

267 Since FLT1 but not FLK1 was detected in MuSCs and MuSC-derived myoblasts, we  
268 asked whether the *Flt1* had an effect on MuSC survival *in vivo*, we evaluated cell death in  
269 MuSCs from *MuSC-Flt1<sup>Δ/Δ</sup>* mouse muscle. We induced muscle regeneration using BaCl<sub>2</sub> for 1  
270 day and assessed for cell death in MuSCs. As seen *in vitro*, we found that loss of *Flt1* in MuSCs  
271 (Figure S2I, S2J) resulted in increased cell death during early regeneration (Figure 3K).  
272 Consequently, single muscle fibers from *MuSC-Flt1<sup>Δ/Δ</sup>* mice showed decreased number of  
273 MuSCs, compared with those from *MuSC-Flt1<sup>+/+</sup>* mice by 28 days following BaCl<sub>2</sub> injection  
274 (Figure 3L). We also examined the long-term *in vivo* consequence of deleting *Flt1* from MuSC.  
275 There was no significant muscle phenotype in *MuSC-Flt1<sup>Δ/Δ</sup>* muscle at homeostasis (Figures 3B,  
276 3M, 3N). However, following injury, the *MuSC-Flt1<sup>Δ/Δ</sup>* muscle had a modest regenerative defect  
277 as indicated by the shift in fiber size distribution following muscle injury (Figures 3B, 3M, 3N,  
278 S3J-N).

279

## 280 **VEGFA-FLT1 pathway regulates muscle pathology in DMD model mice**

281 While angiogenic defects have been reported in the *mdx* mice as well as in golden retrieval  
282 muscular dystrophy (GRMD; canine model of DMD) (Latroche et al., 2015; Verma et al., 2019,  
283 2010; Kodippili et al., 2021; Podkalicka et al., 2021), it is not clear whether VEGF family and its  
284 receptors are implicated in human dystrophinopathies. We probed the VEGF ligands and  
285 receptors in microarrays (Table S1) from skeletal muscles and MuSCs from *mdx* mice  
286 (Pallafacchina et al., 2010; Tseng et al., 2002) and skeletal muscles from the *GRMD* (Vieira et al.,

287 2015). *Vegfa* was downregulated in both models (Figure S4A). *Flt1* was also downregulated in  
288 *GRMD* but not *mdx* muscles. To examine whether VEGF signaling is altered in DMD patients,  
289 we performed gene expression analysis on previously available data from microarrays from  
290 patients with DMD (Chen et al., 2000). We also aggregated and probed microarray data from  
291 muscle biopsies of patients with various neuromuscular diseases or of healthy individuals after  
292 exercise (Bakay et al., 2006). In the microarray data, *Vegfa* expression was increased after an  
293 acute bout of exercise, and *Vegfa* expression was reduced in ALS muscle, BMD muscle, as well  
294 as both early and late phases of DMD muscle (Figure S4A). These data indicate that *Vegfa*  
295 expression is decreased in dystrophinopathy, and thus may benefit people with DMD by  
296 increasing VEGFA as a therapeutic target.

297 Therefore, we crossed the *MuSC-Flt1<sup>Δ/Δ</sup>* mice with the chronically regenerating DMD  
298 model mice (*mdx*) to generate *mdx:MuSC-Flt1<sup>Δ/Δ</sup>* mice, and analyzed long term effects of *Flt1*  
299 deletion (Figure 4A, S4B). Importantly, we found a significant decrease in fiber diameter and  
300 increased fibrosis (Figures 4B-D, S4C) in TA muscle accompanied by a physiological decrease in  
301 muscle perfusion as shown by laser Doppler flow at 12 months age (Figure 4E) as well as a  
302 functional decline in muscle strength as judged by grip strength both acutely and chronically  
303 (Figure 4F).

304 By contrast, when we crossed the *VEGFA<sup>+Hyper</sup>* mice with *mdx* mice (Figure 4A, S4D),  
305 we noticed a significant increase in fiber diameter and decreased fibrosis (Figures 4G-J, S4E) in  
306 both TA and diaphragm muscle of *mdx:VEGFA<sup>+Hyper</sup>* mice accompanied by a physiological  
307 increase in muscle perfusion as shown by laser Doppler flow at 12 months age (Figure 4K) as  
308 well as a functional increase in muscle strength as judged by grip strength (Figure 4L). These

309 data indicate that VEGFA-FLT1 axis is a therapeutic target for the pathology seen in the *mdx*  
310 mice

311

## 312 **Discussion**

313 In this report, we performed bulk and single cell RNA sequencing on MuSCs and ECs. Since  
314 deep reads can significantly reduce the effect of the technical noise in scRNAseq, it can improve  
315 estimation of minor transcriptional state of a given cell (Zhang, 2020). Unexpectedly, we found  
316 that MuSCs broadly express EC prototypic markers in small amounts and used multiple different  
317 bioinformatics techniques to validate the results. While similar phenomenon in myogenic cells  
318 during development and existence of blood vessel-associated myoendothelial cells in the adult  
319 skeletal muscle have been previously described, no functional follow up as been performed  
320 leading to the questions whether these minor expression profiles were artifacts or functional (De  
321 Angelis et al., 1999; Minasi, 2002; Tamaki et al., 2002; Zheng et al., 2007; Roobrouck, 2011;  
322 Huang et al., 2014; Charville et al., 2015; Goel et al., 2017; Giordani et al., 2018). Our goal was  
323 to see whether this small expression pattern had biological consequences. We ultimately decided  
324 to use *Flt1* for further investigations and used RNAscope and immunostaining to validate its  
325 expression in MuSCs. We found that *Flt1* indeed exerts a biological function even at a low  
326 expression. Signaling through VEGFA-FLT1-AKT can improve cell survival in MuSCs both *in*  
327 *vivo* and *in vitro*.

328 On a grander scale, our finding of EC prototype markers expressed in MuSC calls into  
329 two questions 1) the genes that we used to specify cellular identities and 2) the cellular identity  
330 of MuSCs and ECs. The former is important as when we experimentally label, induce or perform  
331 Cre-mediated gene knockout experiments based on our assumptions of different gene expression

332 results which may be confounded for these low expressing genes. For example, we have  
333 previously investigated both *Flt1* and *Kdr* in mouse muscle using three different reporters and  
334 found them to be negative in MuSCs, thereby disregarding their cell-autonomous effect when  
335 evaluating global knockouts (Verma et al., 2018, 2010). It is also possible that EC mRNAs are  
336 results of transcription from the cell or a result of mRNA transfer from neighboring cells  
337 (Desrochers et al., 2016). Of note, the transmission of *tdTomato* mRNA and protein from  
338 *Pax7<sup>+/CreERT2</sup>·R26R<sup>+/tdT</sup>* mice used in this study has been recently shown via exosome, opening  
339 up the possibility of transmission of other mRNA from MuSC to ECs (Murach et al., 2020). The  
340 later is an interesting phenomenon from a developmental point of view. MuSCs and ECs arise  
341 from a bipotent progenitor originated from somites during early development (Kardon et al.,  
342 2002; Hutcheson, 2009; Lagha, 2009; Mayeuf-Louchart, 2014; Mayeuf-Louchart, 2016).  
343 Therefore, it is possible that there is a permissive chromatin state that allows for expression of  
344 reciprocal genes in the two populations. Along the lines of these observations, FLK1(+) or VE-  
345 cadherin(+) cells can contribute to myogenic cells *in vitro* and after cell transplantation (Tamaki  
346 et al., 2002; Le Grand et al., 2004; Zheng et al., 2007; Huang et al., 2014;), and during  
347 development (Drummond and Hatley, 2018; Mayeuf-Louchart et al., 2014; Motoike et al., 2003).  
348 Important notion is that the PDGFR $\alpha$ (-)/FLK1(+) population exhibited restricted potential to  
349 differentiate into the MuSCs in injured muscle (Sakurai et al., 2008). Interestingly, in the  
350 zebrafish, exogenous expression of *Etv2* in the fast muscle can lead to transdifferentiation of  
351 muscle fibers into functional vessels so there is evidence of cell fate flexibility (Veldman et al.,  
352 2013). The potential of EC transdifferentiation was also examined by ETV2 overexpression in  
353 five human cell types, skeletal muscle cells, adipose-derived mesenchymal stem cells, umbilical  
354 cord-derived mesenchymal stem cells, embryonic lung fibroblast cells and skin fibroblast cells.



355 Among them, human skeletal muscle cells showed the highest amenability for this EC induction  
356 following infection with ETV2 lentivirus vector (Yan et al., 2019). Conversely, *Etv2*-deficient  
357 vascular progenitors can differentiate into skeletal muscle cells (Chestnut et al., 2020). It would  
358 be interesting to see whether other EC gene signatures also have functional consequences in the  
359 MuSC or muscle at large.

360 We decided to focus on function of *Ftl1* among several EC genes expressed in MuSCs  
361 for further investigations on MuSC biology. Our pharmacological and genetic analyses  
362 demonstrate that MuSC-derived VEGFA has a drastic effect on cell survival in the via its  
363 receptor FLT1 by signaling through AKT1. While VEGFA binds to both FLT1 and FLK1,  
364 VEGFB and PGF only bind to FLT1. This creates a scenario where PGF and VEGFB binding  
365 can sequester FLT1, increasing free VEGFA availability for VEGFA-FLK1 binding which is the  
366 major VEGF signaling pathway for many cell types (Vempati et al., 2014). While PGF is not  
367 normally expressed in adult tissues, VEGFB is expressed in the MuSCs and muscle fiber (data  
368 not shown). Importantly, the VEGFB-FLT1 axis has also been shown to inhibit apoptosis in  
369 retina and brain cells in mouse models of ocular neurodegeneration and stroke (Li et al., 2008).  
370 While our results cannot rule out the involvement of VEGFB in protection of MuSC apoptosis,  
371 we provide evidence from both pharmacological and genetic data to indicate that VEGFA is  
372 involved.

373 Despite drastic effect of VEGFA-FLT1 on apoptosis *in vitro*, the long-term consequences  
374 of *in vivo* deletion of *Ftl1* in the MuSC compartment were modest compared with deletion of  
375 *Vegfa* in the MuSCs unless crossing with *mdx* mice. Although *Vegfa* is required for both MuSC  
376 survival and recruitment of vascular niche (Verma et al., 2018), in the steady state, the MuSC  
377 turnover may be low enough that the apoptotic stress burden is low. VEGFA improves cell

378 survival during the proliferative stage following injury, however this transient improvement in  
379 survival has only a modest impact on the final regenerative process as shown in  
380 *mdx:VEGFA<sup>+Hyper</sup>* mice.

381 VEGFA and FLT1 targeted therapies are being explored as both pro- and anti-angiogenic  
382 therapies for several indications including retinal degeneration, cancer, pre-eclampsia and  
383 neuromuscular diseases (Bae et al., 2005; Keifer et al., 2014; Mac Gabhann et al., 2011; Verma  
384 et al., 2010; Verma et al., 2019; Bosco et al., 2021; Xin et al., 2021). As these therapies mature,  
385 it will be important to ascertain the MuSC-specific effects of VEGFA and FLT1.

386

## 387 **Materials and Methods**

### 388 **Mice**

389 *Flt1<sup>LoxP/LoxP</sup>* were obtained from Gua-Hua Fong (Ho et al., 2012). *B6.Cg-Pax7<sup>tm1(cre/ERT2)Gaka/J</sup>*  
390 (*Pax7<sup>+/CreERT2</sup>*; JAX stock# 017763; Murphy et al., 2011), *B6.Cg-Gt(ROSA)<sup>26Sortm9(CAG-tdTomato)Hze/J</sup>*  
391 (*Ai9*; JAX stock # 007909; Madisen et al., 2010), *VEGFA<sup>+/Hyper</sup> (Vegfatm1.1Nagy/J*; JAX stock#  
392 027314; Miquerol et al., 1999) and *B6Ros.Cg-Dmd<sup>mdx-5cv/J</sup> (mdx<sup>5cv</sup>*; JAX stock #002379;  
393 Chapman et al., 1989) were obtained from Jackson Laboratory. *Kdr<sup>tm2.1Jrt/J</sup> (Flk1<sup>+GFP</sup>)* were  
394 obtained from Masatsugu Ema (Ema et al., 2006). *B6.Cg-Pax7<sup>tm1(cre/ERT2)Gaka/J</sup> (Pax7<sup>+/CreERT2</sup>)*  
395 mice were crossed with the *B6.Cg-Gt(ROSA)<sup>26Sortm9(CAG-tdTomato)Hze/J</sup> (Ai9)* to yield the  
396 *Pax7<sup>+/CreERT2</sup>:R26R<sup>tdT</sup>(Pax7<sup>tdT</sup>)* mice. *Pax7<sup>tdT</sup>* mice were bred with the *VEGFA<sup>+/Hyper</sup>* and  
397 *Flk1<sup>+GFP</sup>* to obtain *Pax7<sup>+tdT</sup>:VEGFA<sup>+/Hyper</sup>* and *Pax7<sup>+tdT</sup>:Flk1<sup>+GFP</sup>* mice. *VEGFA<sup>LoxP/LoxP</sup>* mice  
398 obtained from Napoleone Ferrara (Gerber et al., 1999) were crossed with *Pax7<sup>+/CreERT2</sup>* to yield  
399 the *Pax7<sup>+/CreERT2</sup>: VEGFA<sup>LoxP/LoxP</sup>* mice. *Flt1<sup>LoxP/LoxP</sup>* mice obtained from Guo-Hua Fong (Ho et al.,  
400 2012) were crossed with *Pax7<sup>+/CreERT2</sup>* to yield the *Pax7<sup>+/CreERT2</sup>:Flt1<sup>LoxP/LoxP</sup>* mice. Colonies for all  
401 the mice were established in the laboratory. Cre recombination was induced using tamoxifen  
402 (Sigma-Aldrich, T5648) dosed as 75 mg/kg body weight x 3 times over one week at 3-6 weeks  
403 of age. Mice carrying the wild-type *CreERT2* allele were used for control experiments. TA  
404 muscle regeneration was induced by intramuscular injection of 20  $\mu$ l of 1% BaCl<sub>2</sub> (Sigma-  
405 Aldrich, 342920) or 20  $\mu$ l of 10  $\mu$ M Cardiotoxin (CTX) (Sigma-Aldrich, V9125). Mice used for  
406 this study is summeried in Table S2.

407 Genotyping to detect the transgenic and mutant alleles was performed by PCR using the  
408 primers described on the web site of Jackson Laboratory shown in Table S3. All primers were  
409 synthesized as custom DNA oligos from Integrated DNA technologies (IDT). Genotyping to

410 detect the mutated allele of *mdx*<sup>5<sup>cv</sup></sup> was performed by PCR using the primers (0981 and 0982)  
411 shown in Table S1. The PCR product DNA was digested with *Dra*III restriction enzyme (New  
412 England Biolabs, R3510S). Wild-type allele generated 180 bp and mutant allele generated 50  
413 and 130 bp bands.

414 The animals were housed in an SPF environment and were monitored by the Research  
415 Animal Resources (RAR) of the University of Minnesota. All protocols were approved by the  
416 Institutional Animal Care and Usage Committee (IACUC) of the University of Minnesota and  
417 complied with the NIH guidelines for the use of animals in research.

418

#### 419 **Cell isolation by FACS**

420 *Pax7*<sup>tdT</sup>:*Flk1*<sup>GFP</sup> mice were utilized for FACS-mediated MuSC and EC isolation as previously  
421 described (Asakura et al, 2002; Verma, 2018). We performed extensive validation of the  
422 fluorescent reporter mice as previously described (Figure S1A-C; Verma, 2018). Briefly,  
423 quiescent MuSCs and ECs were isolated from the hind limb skeletal muscle of 1–2-mo-old  
424 *Pax7*<sup>tdT</sup>:*Flk1*<sup>GFP</sup> mice after digestion with collagenase type II. FACS was performed on an FACS  
425 sorter (BD FACSAria) and data were analyzed using FlowJo (BD Biosciences). Sorting gates,  
426 tdTomato(+) for MuSCs and GFP(+) for ECs, were strictly defined based on control cells  
427 isolated from wild-type mice and the forward scatter and side scatter gating. Sorted cells were  
428 immediately characterized by immunostaining on slide glasses, utilized for RNA preparation or  
429 cultured on collagen-coated plates in the myoblast growth medium as below to obtain MuSC-  
430 derived myoblasts and ECs. FACS analysis was performed as previously described (Turaç et al.,  
431 2013). Cells were either trypsinized (cultured cells) or a single cell suspension was obtained  
432 following enzymatic digestion as whole muscle-derived cells (Asakura, 2002). Cells were then

433 washed with FACS buffer (2% BSA and 1 mM EDTA in PBS) followed by live/dead staining  
434 using ZombieNIR (Biolegends, 423105). Cells were washed, then immunostained for cell  
435 surface markers. Blocking cells was performed with 1% BSA/PBS, and cells were incubated in  
436 fluorescently-conjugated antibody. FACS was performed on a Fortessa X-20 (BD Biosciences)  
437 with a 355 nm, 405 nm, 488 nm, 561 nm, and 640 nm lasers.

438

### 439 **Cell culture**

440 MuSC-derived myoblast isolation from adult mice was performed as previously described  
441 (Asakura et al, 2001; Motohashi et al., 2014). Briefly, after collagenase type II (Worthington,  
442 CLS-2) treatment, dissociated cells from mouse hindlimb muscle were incubated with anti-  
443 CD31-PE (eBiosciences, 12-0311), anti-CD45-PE (eBiosciences, 30-F11), anti-Sca1-PE  
444 (eBiosciences, Dec-81) and anti-Integrin  $\alpha 7$  (MBL International, ABIN487462), followed by  
445 anti-PE microbeads (Miltenyi Biotec, 130-048-801), and then performed LD column (Miltenyi  
446 Biotec, 130-042-901) separation. Negative cell populations will be incubated with anti-Mouse  
447 IgG beads (Miltenyi Biotec, 130-048-402), and then MS column (Miltenyi Biotec, 130-042-  
448 201) separation was performed to isolate Integrin  $\alpha 7$ (+) MuSCs. MuSC-derived myoblasts were  
449 maintained in culture on collagen coated plates in myoblast medium containing 20% FBS and 20  
450 ng/ml bFGF (Invitrogen, PHG0263) in HAM's-F10 medium. Cell cultures were maintained in a  
451 humidified incubator at 37°C with 5% CO<sub>2</sub> and 5% O<sub>2</sub>. 4-hydroxy tamoxifen (4-OHT, Sigma-  
452 Aldrich, H6278) treatment (1  $\mu$ M in EtOH) was used to induce *Flt1* deletion in myoblasts  
453 isolated from *Flt1<sup>LoxP/LoxP</sup>·Pax7<sup>CreERT2</sup>* mice. For cell survival assay, 1 x 10<sup>5</sup> cells were allowed to  
454 adhere for one day and starved overnight in 0.1% FBS in HAM's F10 medium. Then, cells were  
455 exposed to 1  $\mu$ M EdU along with or without 2-100 ng/ml recombinant VEGFA (R&D Systems,

456 493-MV) for 8 hours before being fixed and stained by the Click-iT EdU Alexa Fluor 488  
457 Imaging Kit (Thermo Scientific, C10337). For induction of apoptosis in myoblasts, ( $1-2 \times 10^5$ )  
458 cells were allowed to adhere to the plates for 16 hours. Thapsigargin-mediated apoptosis was  
459 induced by  $1 \mu\text{M}$  of thapsigargin (Sigma-Aldrich, T9033) dissolved in EtOH with or without  
460 VEGFA,  $100 \text{ ng/ml}$  recombinant FLT1-FC (R&D Systems, 7756-FL),  $1 \mu\text{g/ml}$  anti-FLT1  
461 monoclonal antibody (Angio-Proteomie, MAB7072), inhibitors of FLK1,  $3 \mu\text{M}$  ZM306416  
462 (R&D Systems, 2499/1) and  $10 \mu\text{M}$  of SU5402 (R&D Systems, 3300/1) and an inhibitor of  
463 NRP1,  $30 \mu\text{M}$  of EG00229 (R&D Systems, 6986/10) for 24 hours. UV light-mediated apoptosis  
464 was induced by exposing the cells to UV light in cell culture hood for 45 seconds without  
465 medium. After UV exposure, cell survival was assessed 24 hours following culture in 0.1% FBS  
466 in HAM's F10 medium with or without VEGFA using the Crystal violet Assay Kit (Abcam,  
467 ab232855) and quantated the Crystal violet dye after solubilization by absorbance at 570 nm. To  
468 induce differentiation of myoblasts, the myoblast medium was replaced with differentiation  
469 medium that contained DMEM supplemented with 5% horse serum with or without VEGFA or  
470 bFGF for 1 or 3 days followed by anti-sarcomeric myosin heavy chain antibody (Developmental  
471 Study Hybridoma Bank, MF-20).

472

### 473 **AKT induction**

474 The lentiviral pCCL-E4ORF1 and pCCL-myrAkt1 constructs were a kind gift from Dr. Jason  
475 Butler (Kobayashi et al., 2010). 293FT cells (Thermo Fisher Scientific, R70007) were seeded in  
476 DMEM with 10% FBS and transfected with the lentivirus vectors along with pCMV-VSV-G  
477 (Addgene, 8454), pRSV-Rev (Addgene, 12253), and pMDLg/pRRE (Addgene, 12251) using  
478 PolyJet transfection reagent (Signagen Laboratories, SL100688). The culture supernatant of the

479 transfected 293FT cells was added to MuSC-derived myoblast culture with 0.8  $\mu\text{g/ml}$  polybrene  
480 (MilliporeSigma, H9268). pAKT1(+) cells were stained with anti-pAKT antibody (Cell  
481 Signaling, 4060).

482

### 483 **Apoptosis assay**

484 Apoptosis was measured using measured using Annexin V-Biotin Apoptosis Detection Kit  
485 (eBioscience™, BMS500BT-100) as per the manufacture's instruction. Streptavidin-conjugated  
486 AlexaFluro-488 was used for detection. Propidium Iodide (PI) was used in all assays except  
487 when Pax7tdT(+) cells were utilized or when ZombieNIR (Biolegends, 423105) was used. FACS  
488 was performed on a Fortessa X-20 (BD Biosciences) equipped with a 355 nm, 405 nm, 488 nm,  
489 561 nm, and 640 nm lasers.

490

### 491 **Immunostaining of cells**

492 Immunostaining for PECAM1, VE-Cadherin, VEGFA, VEGFRs was performed on collagen  
493 coated coverslips. Other immunostaining was performed on 30 mm tissue culture plates. Cells  
494 were fixed with 2% PFA for 5 minutes and immunostained as previously described (Verma et al.,  
495 2010). For membrane receptor staining, cells were permeabilized with 0.01% saponin  
496 (ThermoFisher Scientific, ICN10285525) which was kept in the staining solution until the  
497 primary antibodies were washed off. At which time, 0.01% Triton-X was added to all the buffers.  
498 The antibodies used for this study are listed in Table S4.

499

### 500 **Single muscle fiber isolation and staining**

501 Extensor digitorum longus (EDL) muscle was dissected and digested with 0.2% collagenase type  
502 I (Sigma-Aldrich, C0130) for single muscle fiber isolation as previously described (Verma et al.,  
503 2010). Single muscle fibers were fixed with 2% PFA/PBS, permeabilized with 0.2% Triton-  
504 X100 and counterstained with DAPI. Anti-Pax7 antibody(+) or tdTomato(+) MuSCs per single  
505 muscle fiber were counted manually.

506

### 507 **RNAscope**

508 RNAscope for *Flt1* transcripts was performed as previously described (Kann and Krauss, 2019)  
509 on single muscle fibers from *Pax7<sup>tdT</sup>* mice using the RNAscope Probe - Mm-Flt1 (C1) (ACDBio,  
510 415541). Briefly, isolated EDL fibers are fixed in 4% PFA, washed with PBS, and dehydrated in  
511 100% methanol. Subsequently, fibers are rehydrated in a stepwise gradient of decreasing  
512 methanol concentrations in PBS/0.1% Tween-20. Fibers are treated with a proteinase for 10  
513 minutes, followed by hybridization, amplification, and fluorophore conjugation steps.

514

### 515 **Histology**

516 The mouse tibialis anterior (TA) muscle was used for all histological analysis. Tissues were  
517 frozen fresh using LiN<sub>2</sub> chilled isopentane and stored at -80°C. Eight μm thick transverse  
518 cryosections were used for all histological analysis. Hematoxylin & Eosin (HE) staining were  
519 performed as previously described (Verma et al., 2010). Sirius red (Direct Red 80, Sigma-  
520 Aldrich, 365548) staining was performed for muscle sections for fibrosis as previously described  
521 (Shimizu-Motohashi et al., 2015). Muscle sections were stained in Oil Red O solution (Sigma-  
522 Aldrich, O1391-250ML) as previously described (Wang et al., 2017). Microscopic images were  
523 captured by a DP-1 digital camera attached to BX51 fluorescence microscope with 10x or 40×



524 UPlanFLN objectives with cellSens Entry 1.11 (all from Olympus). Photoshop (Adobe) and Fiji  
525 (NIH) were used for image processing and manually enumerating the fiber diameter (Schindelin  
526 et al., 2012).

527

### 528 **Grip strength test**

529 Forelimb grip strength test was performed following a previously published procedure (Aartsma-  
530 Rus and van Putten, 2014). Briefly, mice were gently pulled by the tail after fore limb-grasping a  
531 metal bar attached to a force transducer (Grip Strength Meter, Columbus Instruments, 1027CSM-  
532 D52). Grip strength tests were performed by the same blinded examiner. Five consecutive grip  
533 strength tests were recorded, and then mice were returned to the cage for a resting period of 20  
534 minutes. Then, three series of pulls were performed each followed by 20 min resting period. The  
535 average of the three highest values out of the 15 values collected was normalized to the body  
536 weight for comparison.

537

### 538 **Muscle perfusion**

539 RBC flux was evaluated using the moorLab™ laser Doppler flow meter as previously described  
540 (Verma, 2010) with the MP7a probe that allows for collecting light from a deeper tissue level  
541 than standard probes according to the manufacturer's instructions (Moor Instruments). The fur  
542 from the right hind leg was removed using a chemical depilatory. Readings were taken using the  
543 probe from at least 10 different spots on the TA muscle. The AU was determined as the average  
544 AU value during a plateau phase of each measurement.

545

### 546 **RNA and genomic DNA isolation and qPCR**

547 Cultured cells were washed with ice cold PBS and lysed on the place with Trizol™. RNA was  
548 isolated using the DirectZol™ RNA Microprep Kit (Zymo Research, R2062) with on-column  
549 DNase digestion followed by cDNA synthesis using the Transcriptor First Strand cDNA  
550 synthesis kit (Roche Molecular Diagnostics, 04379012001) using random primers. Genomic  
551 DNA for genotyping was isolated from mouse tail snips with lysis buffer containing Proteinase  
552 K (Sigma-Aldrich, P2308). qPCR was performed using GoTaq qPCR Master Mix (Promega,  
553 A6002). The input RNA amount was normalized across all samples and *18S rRNA* or *HtatsFl*  
554 was used for normalization of qPCR across samples. Primer sequences are listed in Table S3. All  
555 primers were synthesized as custom DNA oligos from Integrated DNA technologies (IDT).

556

#### 557 **Single cell RNasequencing and analysis**

558 Cells for single cell RNaseq were obtained from hind limb muscles of 2-3 moth-old  
559 *Pax7<sup>tdT</sup>;Flk1<sup>GFP</sup>* mice following enzymatic digestion as previously described (Liu et al., 2015).  
560 Dead cells were excluded from the analysis using ZombieNIR (Biolegends, 423105).  
561 TdTomato(+) and GFP(+) cells were sorted individually and then 20% of GFP(+) cells were  
562 spiked into 80% tdTomato(+). We loaded ~5,000 cells into 1 channel of the Chromium system  
563 for each of these samples and prepared libraries according to the manufacturer's protocol using  
564 version 2.0 chemistry (10x Genomics). Following capture and lysis, we synthesized cDNA and  
565 amplified for 12 cycles as per the manufacturer's protocol (10x Genomics). The amplified cDNA  
566 was used to construct Illumina sequencing libraries that were each sequenced with ~300K  
567 read/cell on one lane of an Illumina HiSeq 2500 machine. We used Cell Ranger 3.1 (10X  
568 Genomics) to process raw sequencing data. For A custom genome was constructed to include  
569 *eGFP-SV40*, *tdTomato-WPRE-BGHPolyA* and *Pax7-IRES-CreERT2* transgenes. Detailed step-

570 by-step instructions can be found at <https://github.com/verma014/10XCustomRef>. We carried  
571 out analyses of the filtered data using Seurat suite version 3.0 (Stuart et al., 2019) in R studio  
572 (RStudio Team, 2020). For cell imputation, we utilized ALRA through the Seurat wrapper with  
573 default settings(Linderman et al., 2018). Additional scRNAseq datasets were obtained from GEO  
574 and analyzed using the same method as listed above. A myogenic score was calculated based on  
575 the expression of *Myog*, *Pax7*, *Myod1* and *Myf5*. Step-by-step instructions for the analysis can be  
576 found on <https://github.com/verma014/10XCustomRef>.

577

### 578 **Background Subtraction**

579 10x Genomics scRNAseq platform uses many more droplets than cells and so following a run,  
580 there are many droplets that do not have cells. These droplets still get sequenced with some of  
581 the RNA that is in the solution. This floating RNA can be used to estimate the "background" in  
582 each droplet. A better description of this can be found by the developers of 'SoupX' (Young and  
583 Behjati, 2020). Since *Cdh5* expression has previously been verified in MuSCs using RNAscope,  
584 we were able to use it as a positive control to remove the background or "soup" from our data. If  
585 *Cdh5* is absent from MuSC, we know that the background subtraction was too aggressive and  
586 that subtracting the Soup is not reliable in our case. In addition, we know certain genes that are  
587 considered to be specific for MuSCs, muscle ECs or muscle fibers based on the bulk RNAseq  
588 (Verma et al., 2018). The top 5 genes that are specific to these population (and also detected by  
589 10x) were selected and used to show the background in our data set was 14.40% and 13.89% for  
590 the D0 and D3 dataset, respectively. The step-by-step instructions can be found on  
591 <https://github.com/verma014/10XCustomRef>.

592

### 593 **Bulk RNAseq and Microarray Analysis**

594 FASTQ files were downloaded from SRA using SRA-toolkit. Sequences were trimmed using  
595 trimmomatic to remove adapter contamination and low-quality reads. Trimmed sequences were  
596 mapped to mouse mm10 using Hisat2 (Pertea et al., 2016). Transcript assembly was performed  
597 using StringTie (Pertea et al., 2016). Cell type specificity was determined as previously  
598 described (Verma et al., 2018). Microarray analysis was performed using the Affymetrix  
599 Transcriptome Analysis Console (TAC). Samples in each experiment were RNA normalized and  
600 the expression was acquired using the Affymetrix Expression analysis console with gene level  
601 expression. Heatmaps were generated in Prism 9 (Graphpad, La Jolla, CA). The code for  
602 generating each graph is listed in the following table, along with the link to the data in tabular  
603 format.

604

### 605 **Quantification and Statistical Analysis**

606 Statistical analysis was performed using Prism 9 (Graphpad, La Jolla, CA) or RStudio (RStudio  
607 Team, 2020). For comparison between two groups, an unpaired T-test was used. For comparison  
608 between multiple groups, a one-way ANOVA was used with multiple comparisons to the control.  
609 Distributions were compared using a chi-squared test. Graphing of the data was performed using  
610 Prism 9. Vector diagrams were modified using Graphic (Autodesk). All values are means  $\pm$ SEM  
611 unless noted otherwise. \* indicates  $p < 0.05$ , \*\* indicates  $p < 0.01$ , \*\*\* indicates  $p < 0.001$ .

612

### 613 **Data and Software Availability**

614 All the data was obtained from NCBI GEO. Microarrays of mouse MuSCs were obtained from  
615 GSE3483 (Fukada et al., 2007). scRNAseq of MuSCs and muscle ECs was performed in this

616 study (GSE129057). scRNAseq of whole muscle was obtained from GSE143437 (De Micheli et  
617 al., 2020). Bulk RNAseq of MuSCs, ECs and single muscle fibers was obtained from  
618 GSE108739 (Verma et al., 2018) and GSE64379 (Ryall et al., 2015). Bulk RNAseq of TU-  
619 tagged RNA of MuSCs was obtained from GSE97399 (van Velthoven et al., 2017). Bulk  
620 RNAseq of fixed and unfixed MuSCs was obtained from GSE113631 (Yue et al., 2020).  
621 Exercise, ALS, DMD, BMD, FSHD GSE3307, Early DMD GSE465, *mdx* GSE466, GRMD  
622 GSE69040, Satellite cells GSE15155. All arrays were normalized to their respective controls. All  
623 arrays and RNAseq data are listed in Supplemental Table 1 (Table S1).

624

## 625 **Acknowledgements**

626 We thank Minnesota Supercomputing Institute, University of Minnesota Imaging Center,  
627 University of Minnesota FACS Facility, and University of Minnesota Genomics Center for  
628 providing data for this paper. We also thank Jake Trask for critical reading of this paper. We  
629 thank Drs. Yosuke Mukoyama (National Institute of Health), Napoleone Ferrara (Genentech),  
630 Guo-Hua Fong (University of Connecticut) and Masatsugu Ema (Siga University of Medical  
631 Science) for providing *VEGFA*<sup>LoxP/LoxP</sup>, *Flt1*<sup>LoxP/LoxP</sup> and *Flkl1-GFP* mice, respectively. This work  
632 was supported by NIHT32-GM008244 and NIHF30AR066454 to MV, NIAMS grant AR070231  
633 to RSK, a fellowship of the Training Program in Stem Cell Research from the New York State  
634 Department of Health to A.P.K. (NYSTEM-C32561GG) and NIHR01AR062142,  
635 NIHR21AR070319, MDA Research Grant, and Regenerative Medicine Minnesota (RMM) Grant  
636 to AA.

637

638 **Competing interests**

639 The authors declare no competing interests.

640

641 **Reference**

- 642 Aartsma-Rus A, van Putten M. 2014. Assessing Functional Performance in the Mdx Mouse  
643 Model. *J Vis Exp*. 51303. doi:10.3791/51303
- 644 Arsic N, Zacchigna S, Zentilin L, Ramirez-Correa G, Pattarini L, Salvi A, Sinagra G, Giacca M.  
645 2004. Vascular endothelial growth factor stimulates skeletal muscle regeneration in vivo.  
646 *Mol Ther* **10**:844–854. doi: 10.1016/j.ymthe.2004.08.007
- 647 Asakura A, Komaki M, Rudnicki M. 2001. Muscle satellite cells are multipotential stem cells  
648 that exhibit myogenic, osteogenic, and adipogenic differentiation. *Differentiation* **68**:245–  
649 253. doi: 10.1046/j.1432-0436.2001.680412.x.
- 650 Asakura A, Seale P, Girgis-Gabardo A, Rudnicki MA. 2002. Myogenic specification of side  
651 population cells in skeletal muscle. *J Cell Biol* **159**:123–134. doi: 10.1083/jcb.200202092.
- 652 Bae DG, Kim TD, Li G, Yoon WH, Chae CB. 2005. Anti-flt1 peptide, a vascular endothelial  
653 growth factor receptor 1-specific hexapeptide, inhibits tumor growth and metastasis. *Clin*  
654 *Cancer Res* **11**:2651–2661. doi: 10.1158/1078-0432.CCR-04-1564
- 655 Bakay M, Wang Z, Melcon G, Schiltz L, Xuan J, Zhao P, Sartorelli V, Seo J, Pegoraro E,  
656 Angelini C, Shneiderman B, Escolar D, Chen Y-W, Winokur ST, Pachman LM, Fan C,  
657 Mandler R, Nevo Y, Gordon E, Zhu Y, Dong Y, Wang Y, Hoffman EP. 2006. Nuclear  
658 envelope dystrophies show a transcriptional fingerprint suggesting disruption of Rb-MyoD  
659 pathways in muscle regeneration. *Brain* **129**:996–1013. doi:10.1093/brain/awl023
- 660 Bosco J, Zhou Z, Gabriëls S, Verma M, Liu N, Miller BK, Gu S, Lundberg DM, Huang Y,  
661 Brown E, Josiah S, Meiyappan M, Traylor MJ, Chen N, Asakura A, De Jonge N, Blanchetot  
662 C, de Haard H, Duffy HS, Keefe D. 2021. VEGFR-1/Flt-1 inhibition increases  
663 angiogenesis and improves muscle function in a mouse model of Duchenne muscular

- 664 dystrophy. *Mol Ther Methods Clin Dev* **23**:21:369-381. doi: 10.1016/j.omtm.2021.03.013
- 665 Bouchentouf M, Benabdallah BF, Bigey P, Yau TM, Scherman D, Tremblay JP. 2008. Vascular  
666 endothelial growth factor reduced hypoxia-induced death of human myoblasts and  
667 improved their engraftment in mouse muscles. *Gene Ther* **15**:404–414.  
668 doi: 10.1038/sj.gt.3303059
- 669 Bryan BA, Walshe TE, Mitchell DC, Havumaki JS, Saint-Geniez M, Maharaj AS, Maldonado  
670 AE, D’Amore PA, Bryan BA, Walshe TE, Mitchell DC, Havumaki JS, Saint-Geniez M,  
671 Maharaj AS, Maldonado AE, D’Amore PA. 2008. Coordinated vascular endothelial growth  
672 factor expression and signaling during skeletal myogenic differentiation. *Mol Biol Cell*  
673 **19**:994–1006. doi:10.1091/mbc.E07-09-0856
- 674 Chapman VM, Miller DR, Armstrong D, Caskey CT. 1989. Recovery of induced mutations for  
675 X chromosome-linked muscular dystrophy in mice. *Proc Natl Acad Sci U S A* **86**:1292-6.  
676 doi: 10.1073/pnas.86.4.1292
- 677 Charville GW, Cheung TH, Yoo B, Santos PJ, Lee GK, Shrager JB, Rando TA. 2015. Ex Vivo  
678 Expansion and In Vivo Self-Renewal of Human Muscle Stem Cells. *Stem cell Reports*  
679 **5**:621–32. doi:10.1016/j.stemcr.2015.08.004
- 680 Chen YW, Zhao P, Borup R, Hoffman EP. 2000. Expression profiling in the muscular  
681 dystrophies: identification of novel aspects of molecular pathophysiology. *J Cell Biol*  
682 **151**:1321–36. doi:10.1083/jcb.151.6.1321
- 683 Chestnut B, Casie Chetty S, Koenig AL, Sumanas S. 2020. Single-cell transcriptomic analysis  
684 identifies the conversion of zebrafish Etv2-deficient vascular progenitors into skeletal  
685 muscle. *Nat Commun* **11**:2796. doi:10.1038/s41467-020-16515-y
- 686 Christov C, Chretien F, Abou-Khalil R, Bassez G, Vallet G, Authier FJ, Bassaglia Y, Shinin V,



687 Tajbakhsh S, Chazaud B, Gherardi RK. 2007. Muscle satellite cells and endothelial cells:  
688 close neighbors and privileged partners. *Mol Biol Cell* **18**:1397–1409.  
689 doi: 10.1091/mbc.e06-08-0693

690 De Angelis L, Berghella L, Coletta M, Lattanzi L, Zanchi M, Cusella-De Angelis MG, Ponzetto  
691 C, Cossu G. 1999. Skeletal myogenic progenitors originating from embryonic dorsal aorta  
692 coexpress endothelial and myogenic markers and contribute to postnatal muscle growth and  
693 regeneration. *J Cell Biol* **147**:869–877. doi:10.1083/jcb.147.4.869

694 De Micheli AJ, Laurilliard EJ, Heinke CL, Ravichandran H, Fraczek P, Soueid-Baumgarten S,  
695 De Vlaminck I, Elemento O, Cosgrove BD. 2020. Single-Cell Analysis of the Muscle Stem  
696 Cell Hierarchy Identifies Heterotypic Communication Signals Involved in Skeletal Muscle  
697 Regeneration. *Cell Rep* **30**:3583-3595.e5. doi:10.1016/j.celrep.2020.02.067

698 Delavar H, Nogueira L, Wagner PD, Hogan MC, Metzger D, Breen EC. 2014. Skeletal myofiber  
699 VEGF is essential for the exercise training response in adult mice. *AJP Regul Integr Comp*  
700 *Physiol* **306**:R586–R595. doi:10.1152/ajpregu.00522.2013

701 Desrochers LM, Antonyak MA, Cerione RA. 2016. Extracellular Vesicles: Satellites of  
702 Information Transfer in Cancer and Stem Cell Biology. *Dev Cell* **37**:301-309. doi:  
703 10.1016/j.devcel.2016.04.019.

704 Domigan CK, Warren CM, Antanesian V, Happel K, Ziyad S, Lee S, Krall A, Duan L, Torres-  
705 Collado AX, Castellani LW, Elashoff D, Christofk HR, van der Blik AM, Potente M,  
706 Iruela-Arispe ML. 2015. Autocrine VEGF maintains endothelial survival through regulation  
707 of metabolism and autophagy. *J Cell Sci* **128**:2236–48. doi:10.1242/jcs.163774

708 Drummond CJ, Hatley ME. 2018. A Case of mistaken identity: Rhabdomyosarcoma  
709 development from endothelial progenitor cells. *Mol Cell Oncol* **5**:e1448246.

- 710       doi:10.1080/23723556.2018.1448246
- 711   Eichmann A, Marcelle C, Bréant C, Le Douarin NM. 1993. Two molecules related to the VEGF  
712       receptor are expressed in early endothelial cells during avian embryonic development. *Mech*  
713       *Dev* **42**:33–48. doi:10.1016/0925-4773(93)90096-g
- 714   Ema M, Takahashi S, Rossant J. 2006. Deletion of the selection cassette, but not cis-acting  
715       elements, in targeted Flk1-lacZ allele reveals Flk1 expression in multipotent mesodermal  
716       progenitors. *Blood* **107**:111–7. doi:10.1182/blood-2005-05-1970
- 717   Esner M, Meilhac SM, Relaix F, Nicolas J-F, Cossu G, Buckingham ME. 2006. Smooth muscle  
718       of the dorsal aorta shares a common clonal origin with skeletal muscle of the myotome.  
719       *Development* **133**:737–49. doi:10.1242/dev.02226
- 720   Fukada S, Uezumi A, Ikemoto M, Masuda S, Segawa M, Tanimura N, Yamamoto H, Miyagoe-  
721       Suzuki Y, Takeda S. 2007. Molecular signature of quiescent satellite cells in adult skeletal  
722       muscle. *Stem Cells* **25**:2448–59. doi:10.1634/stemcells.2007-0019
- 723   Gay L, Miller MR, Ventura PB, Devasthali V, Vue Z, Thompson HL, Temple S, Zong H, Cleary  
724       MD, Stankunas K, Doe CQ. 2013. Mouse TU tagging: a chemical/genetic intersectional  
725       method for purifying cell type-specific nascent RNA. *Genes Dev* **27**:98–115.  
726       doi:10.1101/gad.205278.112
- 727   Gerber HP, McMurtrey A, Kowalski J, Yan M, Keyt B a, Dixit V, Ferrara N. 1998. Vascular  
728       endothelial growth factor regulates endothelial cell survival through the  
729       phosphatidylinositol 3'-kinase/Akt signal transduction pathway. Requirement for Flk-  
730       1/KDR activation. *J Biol Chem* **273**:30336–43. doi : 10.1074/jbc.273.46.30336
- 731   Germani A, Di Carlo A, Mangoni A, Straino S, Giacinti C, Turrini P, Biglioli P, Capogrossi MC.  
732       2003. Vascular endothelial growth factor modulates skeletal myoblast function. *Am J*

- 733 *Pathol* **163**:1417–1428. doi: 10.1016/S0002-9440(10)63499-2
- 734 Giordani L, He GJ, Negroni E, Sakai H, Law JYC, Siu MM, Wan R, Corneau A, Tajbakhsh S,  
735 Cheung TH, Le Grand F. 2018. High-Dimensional Single-Cell Cartography Reveals Novel  
736 Skeletal Muscle-Resident Cell Populations. *Mol Cell* **74**:609-621.e6. doi:  
737 10.1016/j.molcel.2019.02.026.
- 738 Goel AJ, Rieder MK, Arnold HH, Radice GL, Krauss RS. 2017. Niche Cadherins Control the  
739 Quiescence-to-Activation Transition in Muscle Stem Cells. *Cell Rep* **21**:2236–2250.  
740 doi:10.1016/j.celrep.2017.10.102
- 741 Hardy D, Besnard A, Latil M, Jouvion G, Briand D, Thépenier C, Pascal Q, Guguin A, Gayraud-  
742 Morel B, Cavaillon J-M, Tajbakhsh S, Rocheteau P, Chrétien F. 2016. Comparative Study  
743 of Injury Models for Studying Muscle Regeneration in Mice. *PLoS One* **11**:e0147198.  
744 doi:10.1371/journal.pone.0147198
- 745 Hirai H, Verma M, Watanabe S, Tastad C, Asakura Y, Asakura A. 2010. MyoD regulates  
746 apoptosis of myoblasts through microRNA-mediated down-regulation of Pax3. *J Cell Biol*  
747 **191**:347–65. doi:10.1083/jcb.201006025
- 748 Ho VC, Duan L-J, Cronin C, Liang BT, Fong G-H. 2012. Elevated vascular endothelial growth  
749 factor receptor-2 abundance contributes to increased angiogenesis in vascular endothelial  
750 growth factor receptor-1-deficient mice. *Circulation* **126**:741–52.  
751 doi:10.1161/CIRCULATIONAHA.112.091603
- 752 Huang P, Schulz TJ, Beauvais A, Tseng YH, Gussoni E. 2014.  
753 Intramuscular adipogenesis is inhibited by myo-endothelial progenitors with functioning  
754 Bmpr1a signalling. *Nat Commun* **5**:4063. doi: 10.1038/ncomms5063.
- 755 Hutcheson DA, Kardon G. 2009. Genetic manipulations reveal dynamic cell and gene functions:

- 756           Cre-ating a new view of myogenesis. *Cell Cycle* **8**:3675–8. doi:10.4161/cc.8.22.9992
- 757   Kann AP, Krauss RS. 2019. Multiplexed RNAscope and immunofluorescence on whole-mount  
758           skeletal myofibers and their associated stem cells. *Development* **146**:dev179259  
759           doi:10.1242/dev.179259
- 760   Kardon G, Campbell JK, Tabin CJ. 2002. Local extrinsic signals determine muscle and  
761           endothelial cell fate and patterning in the vertebrate limb. *Dev Cell* **3**:533–45.  
762           doi:10.1016/s1534-5807(02)00291-5
- 763   Keifer OP, O’Connor DM, Boulis NM. 2014. Gene and protein therapies utilizing VEGF for  
764           ALS. *Pharmacol Ther* **141**:261–71. doi:10.1016/j.pharmthera.2013.10.009
- 765   Kobayashi H, Butler JM, O’Donnell R, Kobayashi M, Ding B-S, Bonner B, Chiu VK, Nolan DJ,  
766           Shido K, Benjamin L, Rafii S. 2010. Angiocrine factors from Akt-activated endothelial cells  
767           balance self-renewal and differentiation of haematopoietic stem cells. *Nat Cell Biol*  
768           **12**:1046–56. doi:10.1038/ncb2108
- 769   Kodippili K, Thorne PK, Laughlin MH, Duan D. 2021. Dystrophin deficiency impairs vascular  
770           structure and function in the canine model of Duchenne muscular dystrophy. *J Pathol*  
771           **254**:589-605. doi:10.1002/path.5704
- 772   Lagha M, Brunelli S, Messina G, Cumano A, Kume T, Relaix F, Buckingham ME. 2009.  
773           Pax3:Foxc2 reciprocal repression in the somite modulates muscular versus vascular cell fate  
774           choice in multipotent progenitors. *Dev Cell* **17**:892–9. doi:10.1016/j.devcel.2009.10.021
- 775   Latroche C, Matot B, Martins-Bach A, Briand D, Chazaud B, Wary C, Carlier PG, Chrétien F,  
776           Jouvion G. 2015. Structural and Functional Alterations of Skeletal Muscle Microvasculature  
777           in Dystrophin-Deficient mdx Mice. *Am J Pathol* **185**:2482-94.  
778           doi:10.1016/j.ajpath.2015.05.009

- 779 Latroche C, Weiss-Gayet M, Muller L, Gitiaux C, Leblanc P, Liot S, Ben-Larbi S, Abou-Khalil  
780 R, Verger N, Bardot P, Magnan M, Chrétien F, Mounier R, Germain S, Chazaud B. 2017.  
781 Coupling between Myogenesis and Angiogenesis during Skeletal Muscle Regeneration Is  
782 Stimulated by Restorative Macrophages. *Stem Cell Reports* **9**:2018-2033.  
783 doi:10.1016/j.stemcr.2017.10.027
- 784 Le Grand F, Auda-Boucher G, Levitsky D, Rouaud T, Fontaine-Pérus J, Gardahaut M-F. 2004.  
785 Endothelial cells within embryonic skeletal muscles: a potential source of myogenic  
786 progenitors. *Exp Cell Res* **301**:232–41. doi:10.1016/j.yexcr.2004.07.028
- 787 Lee S, Chen TT, Barber CL, Jordan MC, Murdock J, Desai S, Ferrara N, Nagy A, Roos KP,  
788 Iruela-Arispe ML. 2007. Autocrine VEGF signaling is required for vascular homeostasis.  
789 *Cell* **130**:691–703. doi:10.1016/j.cell.2007.06.054
- 790 Li Y, Zhang F, Nagai N, Tang Z, Zhang S, Scotney P, Lennartsson J, Zhu C, Qu Y, Fang C, Hua  
791 J, Matsuo O, Fong GH, Ding H, Cao Y, Becker KG, Nash A, Heldin CH, Li X. 2008.  
792 VEGF-B inhibits apoptosis via VEGFR-1-mediated suppression of the expression of BH3-  
793 only protein genes in mice and rats. *J Clin Invest* **118**:913–923. doi:10.1172/JCI33673
- 794 Linderman GC, Zhao J, Kluger Y. 2018. Zero-preserving imputation of scRNA-seq data using  
795 low-rank approximation. *bioRxiv* 397588. doi: <https://doi.org/10.1101/397588>
- 796 Liu L, Cheung TH, Charville GW, Rando T a. 2015. Isolation of skeletal muscle stem cells by  
797 fluorescence-activated cell sorting. *Nat Protoc* **10**:1612–1624. doi:10.1038/nprot.2015.110
- 798 Liu Y, Berendsen AD, Jia S, Lotinun S, Baron R, Ferrara N, Olsen BR. 2012. Intracellular  
799 VEGF regulates the balance between osteoblast and adipocyte differentiation. *J Clin Invest*  
800 **122**:3101–3113. doi:10.1172/JCI61209
- 801 Loiben AM, Soueid-Baumgarten S, Kopyto RF, Bhattacharya D, Kim JC, Cosgrove BD. 2017.

- 802 Data-Modeling Identifies Conflicting Signaling Axes Governing Myoblast Proliferation and  
803 Differentiation Responses to Diverse Ligand Stimuli. *Cell Mol Bioeng* **10**:433–450.  
804 doi:10.1007/s12195-017-0508-5
- 805 Mac Gabhann F, Qutub AA, Annex BH, Popel AS. 2011. Systems biology of pro-angiogenic  
806 therapies targeting the VEGF system. *Wiley Interdiscip Rev Syst Biol Med* **2**:694–707.  
807 doi:10.1002/wsbm.92
- 808 Madisen L, Zwingman TA, Sunkin SM, Oh SW, Zariwala HA, Gu H, Ng LL, Palmiter RD,  
809 Hawrylycz MJ, Jones AR, Lein ES, Zeng H. 2010. A robust and high-  
810 throughput Cre reporting and characterization system for the whole mouse brain. *Nat*  
811 *Neurosci* **13**:133-40. doi: 10.1038/nn.2467. Epub 2009 Dec 20
- 812 Mayeuf-Louchart A, Lagha M, Danckaert A, Rocancourt D, Relaix F, Vincent SD, Buckingham  
813 M. 2014. Notch regulation of myogenic versus endothelial fates of cells that migrate from  
814 the somite to the limb. *Proc Natl Acad Sci U S A* **111**:8844–8849.  
815 doi:10.1073/pnas.1407606111
- 816 Mayeuf-Louchart A, Montarras D, Bodin C, Kume T, Vincent SD, Buckingham M. 2016.  
817 Endothelial cell specification in the somite is compromised in Pax3-positive progenitors of  
818 Foxc1/2 conditional mutants, with loss of forelimb myogenesis. *Development* **143**:872–9.  
819 doi:10.1242/dev.128017
- 820 Mercatelli N, Dimauro I, Ciafré SA, Farace MG, Caporossi D. 2010. AlphaB-crystallin is  
821 involved in oxidative stress protection determined by VEGF in skeletal myoblasts. *Free*  
822 *Radic Biol Med* **49**:374–82. doi:10.1016/j.freeradbiomed.2010.04.027
- 823 Messina S, Mazzeo A, Bitto A, Aguenouz M, Migliorato A, De Pasquale MG, Minutoli L,  
824 Altavilla D, Zentilin L, Giacca M, Squadrito F, Vita G. 2007. VEGF overexpression via

825 adeno-associated virus gene transfer promotes skeletal muscle regeneration and enhances  
826 muscle function in mdx mice. *FASEB J* **21**:3737–3746. doi : 10.1096/fj.07-8459com

827 Minasi MG, Riminucci M, De Angelis L, Borello U, Berarducci B, Innocenzi A, Caprioli A,  
828 Sirabella D, Baiocchi M, De Maria R, Boratto R, Jaffredo T, Broccoli V, Bianco P, Cossu G.  
829 2002. The meso-angioblast: a multipotent, self-renewing cell that originates from the dorsal  
830 aorta and differentiates into most mesodermal tissues. *Development* **129**:2773–83. doi:  
831 10.1242/dev.129.11.2773

832 Miquerol L, Gertsenstein M, Harpal K, Rossant J, Nagy a. 1999. Multiple developmental roles  
833 of VEGF suggested by a LacZ-tagged allele. *Dev Biol* **212**:307–322.  
834 doi:10.1006/dbio.1999.9355

835 Motohashi N, Asakura A. 2014. Muscle satellite cell heterogeneity and self-renewal. *Front Cell*  
836 *Dev Biol* **2**:1–11. doi:10.3389/fcell.2014.00001

837 Motohashi N, Asakura Y, Asakura A. 2014. Isolation, culture, and transplantation of muscle  
838 satellite cells. *J Vis Exp* 50846. doi:10.3791/50846

839 Motoike T, Markham DW, Rossant J, Sato TN. 2003. Evidence for novel fate of Flk1+  
840 progenitor: contribution to muscle lineage. *Genesis* **35**:153–9. doi:10.1002/gene.10175

841 Murach KA, Vechetti IJ, Van Pelt DW, Crow SE, Dungan CM, Figueiredo VC, Kosmac K, Fu X,  
842 Richards CI, Fry CS, McCarthy JJ, Peterson CA. 2020. Fusion-Independent Satellite Cell  
843 Communication to Muscle Fibers During Load-Induced Hypertrophy. *Function* **1**:1–15.  
844 doi:10.1093/function/zqaa009

845 Murphy MM, Lawson J a, Mathew SJ, Hutcheson D a, Kardon G. 2011. Satellite cells,  
846 connective tissue fibroblasts and their interactions are crucial for muscle regeneration. *J*  
847 *Cell Sci* **124**:e1–e1. doi:10.1242/jcs098228

848 Noren DP, Chou WH, Lee SH, Qutub AA, Warmflash A, Wagner DS, Popel AS, Levchenko A.  
849 2016. Endothelial cells decode VEGF-mediated Ca<sup>2+</sup> signaling patterns to produce distinct  
850 functional responses. *Sci Signal* **9**:ra20–ra20. doi:10.1126/scisignal.aad3188

851 Okabe K, Kobayashi S, Yamada T, Kurihara T, Tai-nagara I. 2014. Neurons Limit Angiogenesis  
852 by Titrating VEGF in Retina. *Cell* **159**:584–596. doi:10.1016/j.cell.2014.09.025

853 Olfert IM, Howlett RA, Tang K, Dalton ND, Gu Y, Peterson KL, Wagner PD, Breen EC. 2009.  
854 Muscle-specific VEGF deficiency greatly reduces exercise endurance in mice. *J Physiol*  
855 **587**:1755–1767. doi: : 10.1113/jphysiol.2008.164384

856 Pallafacchina G, François S, Regnault B, Czarny B, Dive V, Cumano A, Montarras D,  
857 Buckingham M. 2010. An adult tissue-specific stem cell in its niche: a gene profiling  
858 analysis of in vivo quiescent and activated muscle satellite cells. *Stem Cell Res* **4**:77–91.  
859 doi:10.1016/j.scr.2009.10.003

860 Pertea M, Kim D, Pertea GM, Leek JT, Salzberg SL. 2016. Transcript-level expression analysis  
861 of RNA-seq experiments with HISAT, StringTie and Ballgown. *Nat Protoc* **11**:1650–1667.  
862 doi:10.1038/nprot.2016.095

863 Podkalicka P, Mucha O, Kaziród K, Bronisz-Budzyńska I, Ostrowska-Paton S, Tomczyk M,  
864 Andrysiak K, Stępniewski J, Dulak J, Łoboda A. 2021. Age-Dependent Dysregulation of  
865 Muscle Vasculature and Blood Flow Recovery after Hindlimb Ischemia in the mdx Model  
866 of Duchenne Muscular Dystrophy. *Biomedicines* **9**:481. doi: 10.3390/biomedicines9050481.

867 Poesen K, Lambrechts D, Van Damme P, Dhondt J, Bender F, Frank N, Bogaert E, Claes B,  
868 Heylen L, Verheyen A, Raes K, Tjwa M, Eriksson U, Shibuya M, Nuydens R, Van Den  
869 Bosch L, Meert T, D’Hooge R, Sendtner M, Robberecht W, Carmeliet P. 2008. Novel Role  
870 for Vascular Endothelial Growth Factor (VEGF) Receptor-1 and Its Ligand VEGF-B in



- 871 Motor Neuron Degeneration. *J Neurosci* **28**:10451–10459. doi:10.1523/JNEUROSCI.1092-  
872 08.2008
- 873 Roobrouck VD, Clavel C, Jacobs SA, Ulloa-Montoya F, Crippa S, Sohni A, Roberts SJ, Luyten  
874 FP, Van Gool SW, Sampaolesi M, Delforge M, Luttun A, Verfaillie CM. 2011.  
875 Differentiation potential of human postnatal mesenchymal stem cells, mesoangioblasts, and  
876 multipotent adult progenitor cells reflected in their transcriptome and partially influenced by  
877 the culture conditions. *Stem Cells* **29**:871–82. doi:10.1002/stem.633
- 878 RStudio Team. 2020. RStudio: Integrated Development for R. RStudio, PBC, Boston, MA.  
879 <http://www.rstudio.com/>
- 880 Ryall JG, Dell’Orso S, Derfoul A, Juan A, Zare H, Feng X, Clermont D, Koulis M, Gutierrez-  
881 Cruz G, Fulco M, Sartorelli V. 2015. The NAD<sup>+</sup>-dependent sirt1 deacetylase translates a  
882 metabolic switch into regulatory epigenetics in skeletal muscle stem cells. *Cell Stem Cell*  
883 **16**:171–183. doi:10.1016/j.stem.2014.12.004
- 884 Sakurai H, Okawa Y, Inami Y, Nishio N, Isobe K. 2008. Paraxial mesodermal progenitors  
885 derived from mouse embryonic stem cells contribute to muscle regeneration via  
886 differentiation into muscle satellite cells. *Stem Cells* **26**:1865–73.  
887 doi:10.1634/stemcells.2008-0173
- 888 Schindelin J, Arganda-Carreras I, Frise E, Kaynig V, Longair M, Pietzsch T, Preibisch S,  
889 Rueden C, Saalfeld S, Schmid B, Tinevez J-Y, White DJ, Hartenstein V, Eliceiri K,  
890 Tomancak P, Cardona A. 2012. Fiji: an open-source platform for biological-image analysis.  
891 *Nat Methods* **9**:676–82. doi:10.1038/nmeth.2019
- 892 Shimizu-Motohashi Y, Asakura Y, Motohashi N, Belur NR, Baumrucker MG, Asakura A. 2015.  
893 Pregnancy-induced amelioration of muscular dystrophy phenotype in mdx mice via muscle

894 membrane stabilization effect of glucocorticoid. *PLoS One*. **10**:e0120325. doi:  
895 10.1371/journal.pone.0120325.

896 Stuart T, Butler A, Hoffman P, Hafemeister C, Papalexi E, Mauck WM, Hao Y, Stoeckius M,  
897 Smibert P, Satija R. 2019. Comprehensive Integration of Single-Cell Data. *Cell* **177**:1888-  
898 1902.e21. doi:10.1016/j.cell.2019.05.031

899 Tamaki T, Akatsuka A, Ando K, Nakamura Y, Matsuzawa H, Hotta T, Roy RR, Edgerton VR.  
900 2002. Identification of myogenic-endothelial progenitor cells in the interstitial spaces of  
901 skeletal muscle. *J Cell Biol* **157**:571–7. doi:10.1083/jcb.200112106

902 Tang K, Breen EC, Gerber H-P, Ferrara NM a, Wagner PD. 2004. Capillary regression in  
903 vascular endothelial growth factor-deficient skeletal muscle. *Physiol Genomics* **18**:63–69.  
904 doi:10.1152/physiolgenomics.00023.2004

905 Torre E, Dueck H, Shaffer S, Gospocic J, Gupte R, Bonasio R, Kim J, Murray J, Raj A. 2018.  
906 Rare Cell Detection by Single-Cell RNA Sequencing as Guided by Single-Molecule RNA  
907 FISH. *Cell Syst* **6**:171-179.e5. doi:10.1016/j.cels.2018.01.014

908 Tozer S, Bonnin M-A, Relaix F, Di Savino S, García-Villalba P, Coumailleau P, Duprez D. 2007.  
909 Involvement of vessels and PDGFB in muscle splitting during chick limb development.  
910 *Development* **134**:2579–91. doi:10.1242/dev.02867

911 Tseng BS, Zhao P, Pattison JS, Gordon SE, Granchelli JA, Madsen RW, Folk LC, Hoffman EP,  
912 Booth FW. 2002. Regenerated mdx mouse skeletal muscle shows differential mRNA  
913 expression. *J Appl Physiol* **93**:537–45. doi:10.1152/jappphysiol.00202.2002

914 Turaç G, Hindley CJ, Thomas R, Davis JA, Deleidi M, Karaöz E, Pruszek J. 2013. Combined  
915 Flow Cytometric Analysis of Surface and Intracellular Antigens Reveals Surface Molecule  
916 Markers of Human Neuropoiesis. *PLoS One* **8**:1–14. doi:10.1371/journal.pone.0068519

- 917 van Velthoven CTJ, de Morree A, Egner IM, Brett JO, Rando TA. 2017. Transcriptional  
918 Profiling of Quiescent Muscle Stem Cells In Vivo. *Cell Rep* **21**:1994–2004.  
919 doi:10.1016/j.celrep.2017.10.037
- 920 Veldman MB, Zhao C, Gomez G a, Lindgren AG, Huang H, Yang H, Yao S, Martin BL,  
921 Kimelman D, Lin S. 2013. Transdifferentiation of fast skeletal muscle into functional  
922 endothelium in vivo by transcription factor *etv2*. *PLoS Biol* **11**:e1001590.  
923 doi:10.1371/journal.pbio.1001590
- 924 Vempati P, Popel AS, Mac Gabhann F. 2014. Extracellular regulation of VEGF: Isoforms,  
925 proteolysis, and vascular patterning. *Cytokine Growth Factor Rev* **25**:1–19.  
926 doi:10.1016/j.cytogfr.2013.11.002
- 927 Verma M, Asakura Y, Hirai H, Watanabe S, Tastad C, Fong G-H, Ema M, Call JA, Lowe DA,  
928 Asakura A. 2010. Flt-1 haploinsufficiency ameliorates muscular dystrophy phenotype by  
929 developmentally increased vasculature in mdx mice. *Hum Mol Genet* **19**:4145–59.  
930 doi:10.1093/hmg/ddq334
- 931 Verma M, Asakura Y, Murakonda BSR, Pengo T, Latroche C, Chazaud B, McLoon LK,  
932 Asakura A. 2018. Muscle Satellite Cell Cross-Talk with a Vascular Niche Maintains  
933 Quiescence via VEGF and Notch Signaling. *Cell Stem Cell* **23**:530-543.e9.  
934 doi:10.1016/j.stem.2018.09.007
- 935 Verma M, Shimizu-Motohashi Y, Asakura Y, Ennen JP, Bosco J, Zhou Z, Fong G, Josiah S,  
936 Keefe D, Asakura A. 2019. Inhibition of FLT1 ameliorates muscular dystrophy phenotype  
937 by increased vasculature in a mouse model of Duchenne muscular dystrophy. *PLOS Genet*  
938 **15**:e1008468. doi:10.1371/journal.pgen.1008468
- 939 Vieira NM, Elvers I, Alexander MS, Moreira YB, Eran A, Gomes JP, Marshall JL, Karlsson EK,

- 940 Verjovski-Almeida S, Lindblad-Toh K, Kunkel LM, Zatz M. 2015. Jagged 1 Rescues the  
941 Duchenne Muscular Dystrophy Phenotype. *Cell* **163**:1204–1213.  
942 doi:10.1016/j.cell.2015.10.049
- 943 Wagner PD, Olfert IM, Tang K, Breen EC. 2006. Muscle-targeted deletion of VEGF and  
944 exercise capacity in mice. *Respir Physiol Neurobiol* **151**:159–166.  
945 doi:10.1016/j.resp.2005.09.007
- 946 Wang C, Liu W, Nie Y, Qaher M, Horton HE, Yue F, Asakura A, Kuang S. 2017. Loss of MyoD  
947 Promotes Fate Transdifferentiation of Myoblasts Into Brown Adipocytes. *EBioMedicine*  
948 **16**:212-223. doi: 10.1016/j.ebiom.2017.01.015.
- 949 Xin C, Chu X, Wei W, Kuang B, Wang Y, Tang Y, Chen J, You H, Li C, Wang B. 2021.  
950 Combined gene therapy via VEGF and mini-dystrophin synergistically improves  
951 pathologies in temporalis muscle of dystrophin/utrophin double knockout mice. *Hum Mol*  
952 *Genet* **30**:1349-1359. doi: 10.1093/hmg/ddab120.
- 953 Yan G, Yan R, Chen C, Chen C, Zhao Y, Qin W, Veldman MB, Li S, Lin S. 2019. Engineering  
954 vascularized skeletal muscle tissue with transcriptional factor ETV2-induced autologous  
955 endothelial cells. *Protein Cell* **10**:217–222. doi:10.1007/s13238-018-0542-7
- 956 Yan H, Guo Y, Zhang P, Zu L, Dong X, Chen L, Tian J, Fan X, Wang N, Wu X, Gao W. 2005.  
957 Superior neovascularization and muscle regeneration in ischemic skeletal muscles following  
958 VEGF gene transfer by rAAV1 pseudotyped vectors. *Biochem Biophys Res Commun*  
959 **336**:287–298. doi: 10.1016/j.bbrc.2005.08.066
- 960 Young MD, Behjati S. 2020. SoupX removes ambient RNA contamination from droplet-based  
961 single-cell RNA sequencing data. *Gigascience* **9**:giaa151. doi: 10.1093/gigascience/giaa151.
- 962 Yue L, Wan R, Luan S, Zeng W, Cheung TH. 2020. Dek Modulates Global Intron Retention

963 during Muscle Stem Cells Quiescence Exit. *Dev Cell* **53**:661-676.e6.  
964 doi:10.1016/j.devcel.2020.05.006

965 Zhang MJ, Ntranos V, Tse D. 2020. Determining sequencing depth in a single-cell RNA-seq  
966 experiment. *Nat Commun* **11**:1–11. doi:10.1038/s41467-020-14482-y

967 Zheng B, Cao B, Crisan M, Sun B, Li G, Logar A, Yap S, Pollett JB, Drowley L, Cassino T,  
968 Gharaibeh B, Deasy BM, Huard J, Péault B. 2007. Prospective identification of myogenic  
969 endothelial cells in human skeletal muscle. *Nat Biotechnol* **25**:1025-34. doi:  
970 10.1038/nbt1334

971

972

973 **Figure Legends**

974

975 **Figure 1. EC gene signal including VEGF receptor genes in MuSCs.**

976 A) Experimental schema for bulk and single cell sequencing from the  
977 *Pax7<sup>CreERT2</sup>:R26R<sup>tdT</sup>:Flk1<sup>GFP</sup>* mice. Bulk sequencing performed on MuSCs, ECs and  
978 single muscle fibers (SMFs) from uninjured muscle. FACS sorted MuSCs and ECs from  
979 uninjured and regenerating TA muscle (3 days following CTX) were run separately on  
980 the 10X single cell platform and aggregated.

981 B) Bulk RNAseq showing EC signature in MuSCs. Subset dividing genes that are  
982 commonly used to delineate cell identity for MuSCs, ECs and SMFs. Last column shows  
983 genes that define macrophages (M $\phi$ ), which should not be highly expressed in any of our  
984 cell types. Red dots indicate MuSCs, green dots indicate ECs and blue dots indicate  
985 SMFs.

986 C) UMAP from aggregated single cell RNAseq shows expression of different phases of  
987 MuSCs (quiescent MuSCs, activated MuSCs and myoblasts), ECs (tip ECs and ECs) and  
988 from likely contaminant cells such as macrophages (M $\phi$ ) and smooth muscle cells  
989 (SMC).

990 D) UMAP from aggregated data visualized by sample day showing MuSCs segregated by  
991 the sample day but overlap in the EC population. Red dots indicate intact (day 0) and  
992 blue dots indicate 3 days following CTX.

993 E) Expression of quality control genes such as *eGFP*, *tdTomato*, *CreERT2* and EC genes  
994 such as *Cdh5*, *Kdr* and *Flt1*.

- 995 F) Genome browser tracks of whole muscle and TU-tagged MuSC nascent RNA  
996 (GSE97399, van Velthoven et al., 2017). *Kdr* and *Pecam1* expression can be found in the  
997 MuSC fraction. As control, *Myh1* is highly expressed in the whole muscle preparation but  
998 largely absent in the MuSC fraction. *Sdc4* and *Calcr* are highly expressed in MuSC and  
999 less so in the whole muscle fraction.
- 1000 G) qPCR for *Kdr*, *Flt1*, *Nrp1* and *Nrp2* in EC lines (B.end3 and C166), muscle cell line  
1001 (C2C12) and MuSC-derived myoblasts in growth and differentiation medium (DM)  
1002 shows low level expression of VEGFRs and VEGF co-receptors.
- 1003 H) RNAScope of *Flt1* on freshly isolated single muscle fibers from *Pax7<sup>tdT</sup>* mice shows *Flt1*  
1004 expression (green) and tdTomato (red) in MuSCs. Nuclei were counterstained with DAPI  
1005 (blue). Scale bar indicates 5  $\mu$ m.
- 1006 I) Immunostaining for PECAM1, VE-cadherin (VE-Cad), VEGFA co-receptors (NRP1 and  
1007 NRP2) and VEGFA receptors (FLT1 and FLK1) in B.End3 EC cell line and MuSC-  
1008 derived myoblasts (MB). Nuclei were counterstained with DAPI (blue). Scale bar  
1009 indicates 20  $\mu$ m.

1010

1011 **Figure 2. VEGFA-FLT1-AKT1 axis controls apoptosis in MuSC *in vitro*.**

- 1012 A) Immunostaining for VEGFA (green) in MuSC-derived myoblasts. Nuclei were  
1013 counterstained with DAPI (blue). Scale bar indicates 20  $\mu$ m.
- 1014 B) Experimental scheme for assessing apoptosis following thapsigargin induction in  
1015 myoblast culture.

- 1016 C) Decreased cell survival in myoblast *in vitro* as VEGFA is blocked using FLT1-FC (a  
1017 VEGFA trap) following thapsigargin induction. This phenotype is partially rescued with  
1018 exogenous VEGFA (50 ng/ml).
- 1019 D) Graphical representation of the VEGF pathway inhibitors used in panel E.
- 1020 E) Following thapsigargin induction, apoptotic and necrotic cells are increased with  
1021 inhibition of FLT1 via FLT1-FC or anti-FLT1 antibody (anti-FLT1 mAb) but not FLK1  
1022 (SU5402 and ZM306416) or NRP1-FLK1 inhibition (EG00229) following exogenous  
1023 VEGFA (50 ng/ml).
- 1024 F) 4-OHT induced deletion of *Flt1* in *Pax7<sup>+/CreER</sup>:Flt1<sup>Loxp/Loxp</sup>* myoblasts is sufficient to  
1025 reduce cell survival in myoblast without induction of apoptosis.
- 1026 G) Cell survival is decreased *in vitro* in myoblast with thapsigargin induction following 4-  
1027 OHT mediated deletion of *Flt1* in *Pax7<sup>+/CreER</sup>:Flt1<sup>Loxp/Loxp</sup>* myoblast that is not rescued by  
1028 exogenous VEGFA. Blue indicates *MuSC-Flt1<sup>+/+</sup>*, red indicates *MuSC-Flt1<sup>+/+</sup>* with 50  
1029 ng/ml VEGFA, green indicates *MuSC-Flt1<sup>Δ/Δ</sup>* and purple indicates *MuSC-Flt1<sup>Δ/Δ</sup>* with 50  
1030 ng/ml VEGFA.
- 1031 H) Representative images of pAKT (red) in myoblast stained by MyoD (green) in *MuSC-*  
1032 *Flt1<sup>+/+</sup>* and *MuSC-Flt1<sup>Δ/Δ</sup>* myoblasts induced with exogenous VEGFA. Nuclei were  
1033 counterstained with DAPI (blue). Scale bar indicates 50 μm.
- 1034 I) Quantification of pAKT in myoblasts stained by MyoD in *MuSC-Flt1<sup>+/+</sup>* and *MuSC-*  
1035 *Flt1<sup>Δ/Δ</sup>* myoblast induced w/wo exogenous VEGFA. VEGFA induction increases pAKT  
1036 in *MuSC-Flt1<sup>+/+</sup>* myoblasts but this response is lost in *MuSC-Flt1<sup>Δ/Δ</sup>* myoblasts.



1037 J) Annexin V quantification of myoblasts transfected with myr-AKT and E4ORF1 to  
1038 activate AKT1 showed increased cell survival of myoblasts following thapsigargin  
1039 induction.

1040 K) Representative model for VEGFA-FLT1-AKT axis-mediated MuSC survival.

1041

1042 **Figure 3. MuSC-derived *VEGFA* and *Flt1* requires proper skeletal muscle.**

1043 A) Experimental schema detailing the experiments performed in this figure. The  
1044 *Pax7<sup>+/CreER</sup>:R26R<sup>tdT</sup>:VEGFA<sup>+Hyper</sup>* (*VEGFA<sup>+Hyper</sup>*) *Pax7<sup>+/CreER</sup>:R26R<sup>tdT</sup>:VEGFA<sup>Loxp/Loxp</sup>*  
1045 for *MuSC-VEGFA<sup>Δ/Δ</sup>* and *Pax7<sup>tdT</sup>:Flt1<sup>Loxp/Loxp</sup>* for *MuSC-Flt1<sup>Δ/Δ</sup>* lines were pulsed with  
1046 tamoxifen (TMX) prior to investigation.

1047 B) Representative H&E-stained images for intact and on 14-day post injury TA muscle from  
1048 *MuSC-VEGFA<sup>+Hyper</sup>*, *MuSC-Flt1<sup>Δ/Δ</sup>* and *MuSC-VEGFA<sup>Δ/Δ</sup>* mice and their representative  
1049 controls. Scale bar indicates 50 μm.

1050 C) Annexin V staining show less necrotic cells in MuSC from *VEGFA<sup>+Hyper</sup>* mice compared  
1051 with the control one day following injury.

1052 D) Quantification of MuSCs from single muscle fibers show increased MuSCs in  
1053 *VEGFA<sup>+Hyper</sup>* EDL muscle compared with the control mice at base line and 14 days post  
1054 injury.

1055 E) Fiber size distribution and F) mean feret's diameter of uninjured and regenerating muscle  
1056 14 days post injury from *VEGFA<sup>+Hyper</sup>* and control mice show no difference at baseline  
1057 but an increase in fiber diameter following injury.

1058 G) Annexin V staining show increased dead cells in MuSCs from *MuSC-VEGFA<sup>Δ/Δ</sup>* mice  
1059 one day following CTX compared with the control *MuSC-VEGFA<sup>+/+</sup>* mice.

- 1060 H) Quantification of MuSCs from single muscle fiber at base line and 14 days post injury.
- 1061 D) Fiber size distribution and J) mean feret's diameter of uninjured and regenerating muscle
- 1062 14 days post injury from *MuSC-VEGFA<sup>Δ/Δ</sup>* and *MuSC-VEGFA<sup>+/+</sup>* mice show no
- 1063 difference at baseline but a decrease in fiber diameter following injury.
- 1064 K) Annexin V staining show increased apoptosis in MuSCs from *MuSC-Flt1<sup>Δ/Δ</sup>* mice one
- 1065 day following injury compared with the control *MuSC-Flt1<sup>+/+</sup>* mice.
- 1066 L) Quantification of MuSCs from single muscle fiber show decreased MuSCs in *MuSC-*
- 1067 *Flt1<sup>Δ/Δ</sup>* EDL muscle at base line and 14 days post injury compared with the control
- 1068 *MuSC-Flt1<sup>+/+</sup>* mice.
- 1069 M) Fiber size distribution and N) mean feret's diameter of uninjured and regenerating muscle
- 1070 from *MuSC-Flt1<sup>Δ/Δ</sup>* and compared with the control *MuSC-Flt1<sup>+/+</sup>* mice show no
- 1071 difference at baseline but a decrease in fiber diameter following injury.

1072

1073 **Figure 4. VEGFA-FLT1 pathway in MuSCs regulates muscle pathology in DMD model**

1074 **mice.**

- 1075 A) Experimental schema detailing the experiments performed in this figure. The
- 1076 *mdx:Pax7<sup>tdT</sup>:Flt1<sup>Loxp/Loxp</sup>* was pulsed with tamoxifen (TMX) to generate *mdx:MuSC-*
- 1077 *Flt1<sup>Δ/Δ</sup>* mice prior to investigation. *mdx:VEGFA<sup>+Hyper</sup>* mouse line was used without any
- 1078 induction.
- 1079 B) Representative H&E and Sirius red stain from *mdx:MuSC-Flt1<sup>+/+</sup>* and *mdx:MuSC-Flt1<sup>Δ/Δ</sup>*
- 1080 mouse TA muscle at 3 months of age. Scale bar indicates 50 μm.
- 1081 C) Smaller average fiber size in *mdx:MuSC-Flt1<sup>Δ/Δ</sup>* compared with the control *mdx:MuSC-*
- 1082 *Flt1<sup>+/+</sup>* mouse TA muscle.

- 1083 D) Increased fibrotic area in *mdx:MuSC-Flt1<sup>Δ/Δ</sup>* compared with the control *mdx:MuSC-*  
1084 *Flt1<sup>+/+</sup>* mouse TA muscle.
- 1085 E) Decreased muscle perfusion in *mdx:MuSC-Flt1<sup>Δ/Δ</sup>* compared with the control *mdx:MuSC-*  
1086 *Flt1<sup>+/+</sup>* mouse TA muscle.
- 1087 F) Decreased grip strength normalized to body weight in *mdx:MuSC-Flt1<sup>Δ/Δ</sup>* compared with  
1088 the control *mdx:MuSC-Flt1<sup>+/+</sup>* mouse TA muscle at both 3 and 12 months of age.
- 1089 G) Representative H&E and Sirius red stain from *mdx:VEGFA<sup>+Hyper</sup>* and *mdx:VEGFA<sup>+/+</sup>*  
1090 mouse TA muscle at 3 months from TA muscle (top four panels) and diaphragm muscle  
1091 (bottom four panels).
- 1092 H) Increased average fiber size in *mdx:VEGFA<sup>+Hyper</sup>* compared with the control  
1093 *mdx:VEGFA<sup>+/+</sup>* mouse TA and diaphragm (DM) muscle. Scale bar indicates 50 μm.
- 1094 I) Decreased fibrosis in *mdx:VEGFA<sup>+Hyper</sup>* compared with the control *mdx:VEGFA<sup>+/+</sup>*  
1095 mouse TA muscle.
- 1096 J) Decreased fibrosis in *mdx:VEGFA<sup>+Hyper</sup>* compared with the control *mdx:VEGFA<sup>+/+</sup>*  
1097 mouse diaphragm (DM) muscle.
- 1098 K) Muscle perfusion is increased in *mdx:VEGFA<sup>+Hyper</sup>* compared with the control  
1099 *mdx:VEGFA<sup>+/+</sup>* mouse TA muscle.
- 1100 L) Grip strength normalized to body weight is increased in *mdx:VEGFA<sup>+Hyper</sup>* compared  
1101 with the control *mdx:VEGFA<sup>+/+</sup>* mice.

# Figure 1

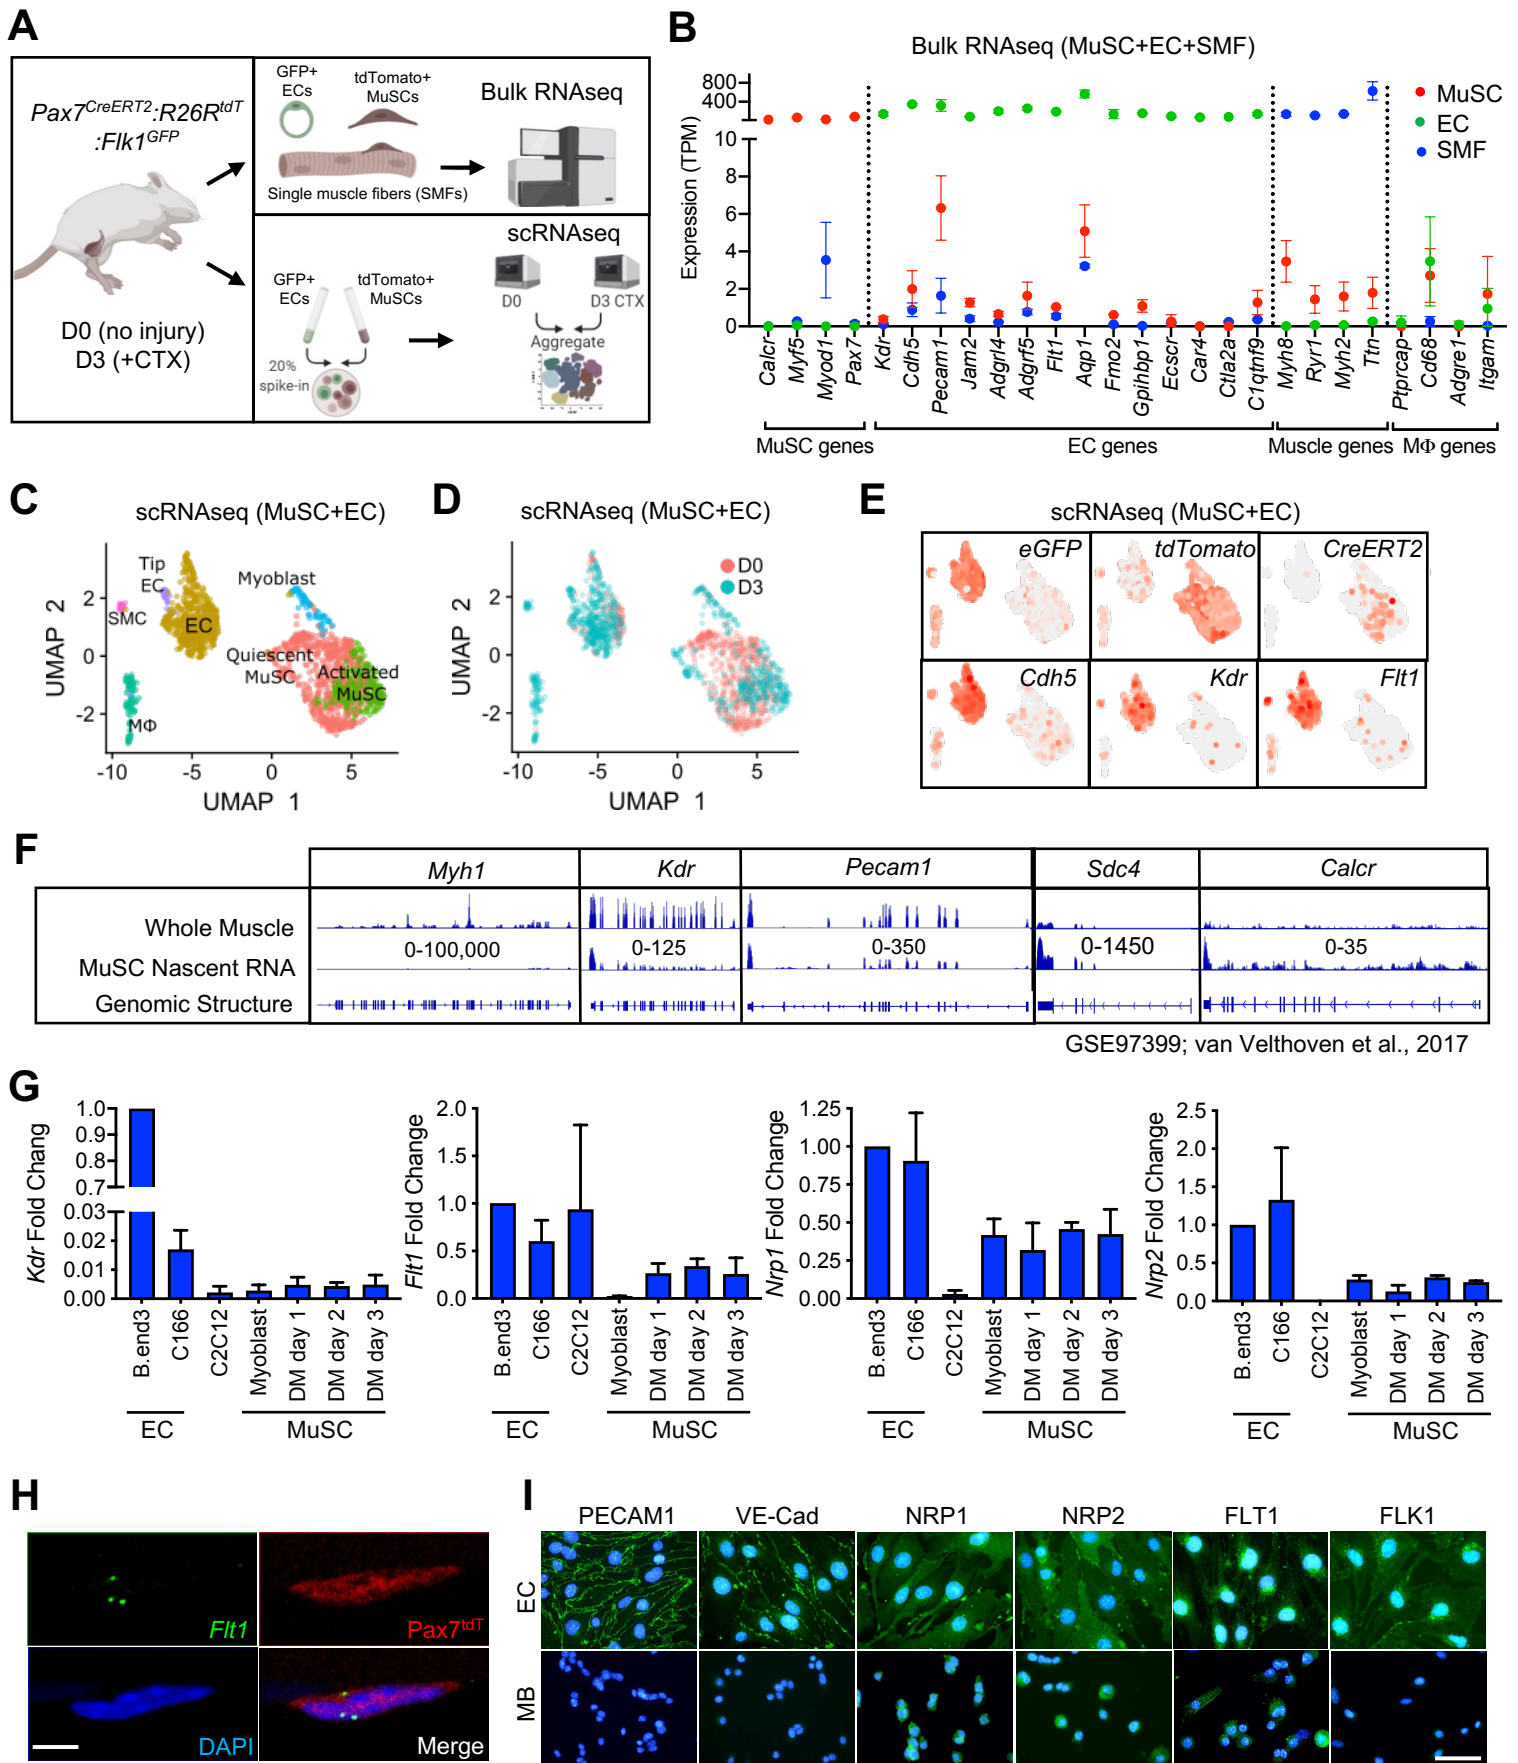

## Figure 2

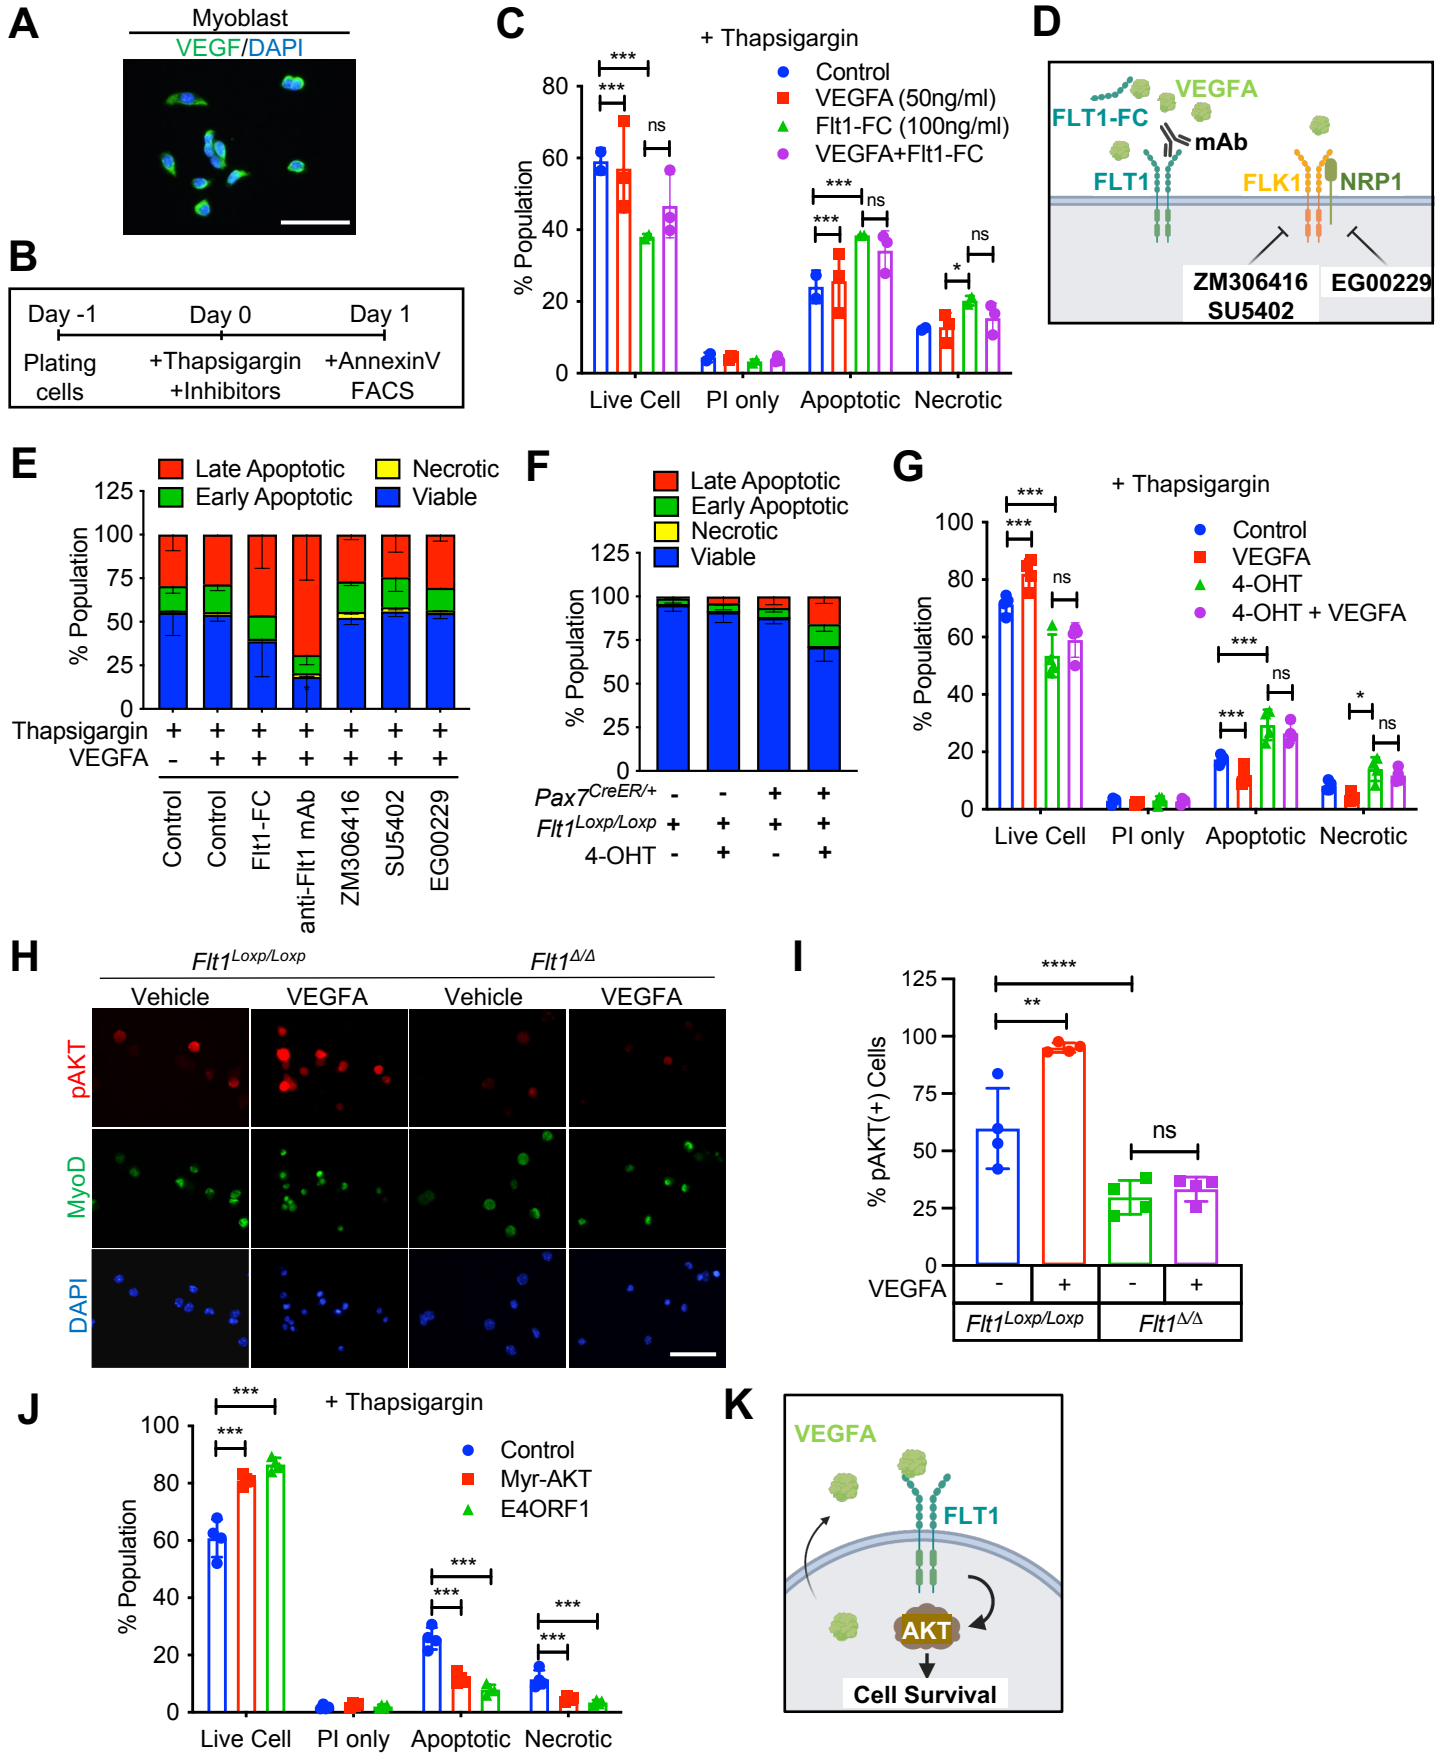

# Figure 3

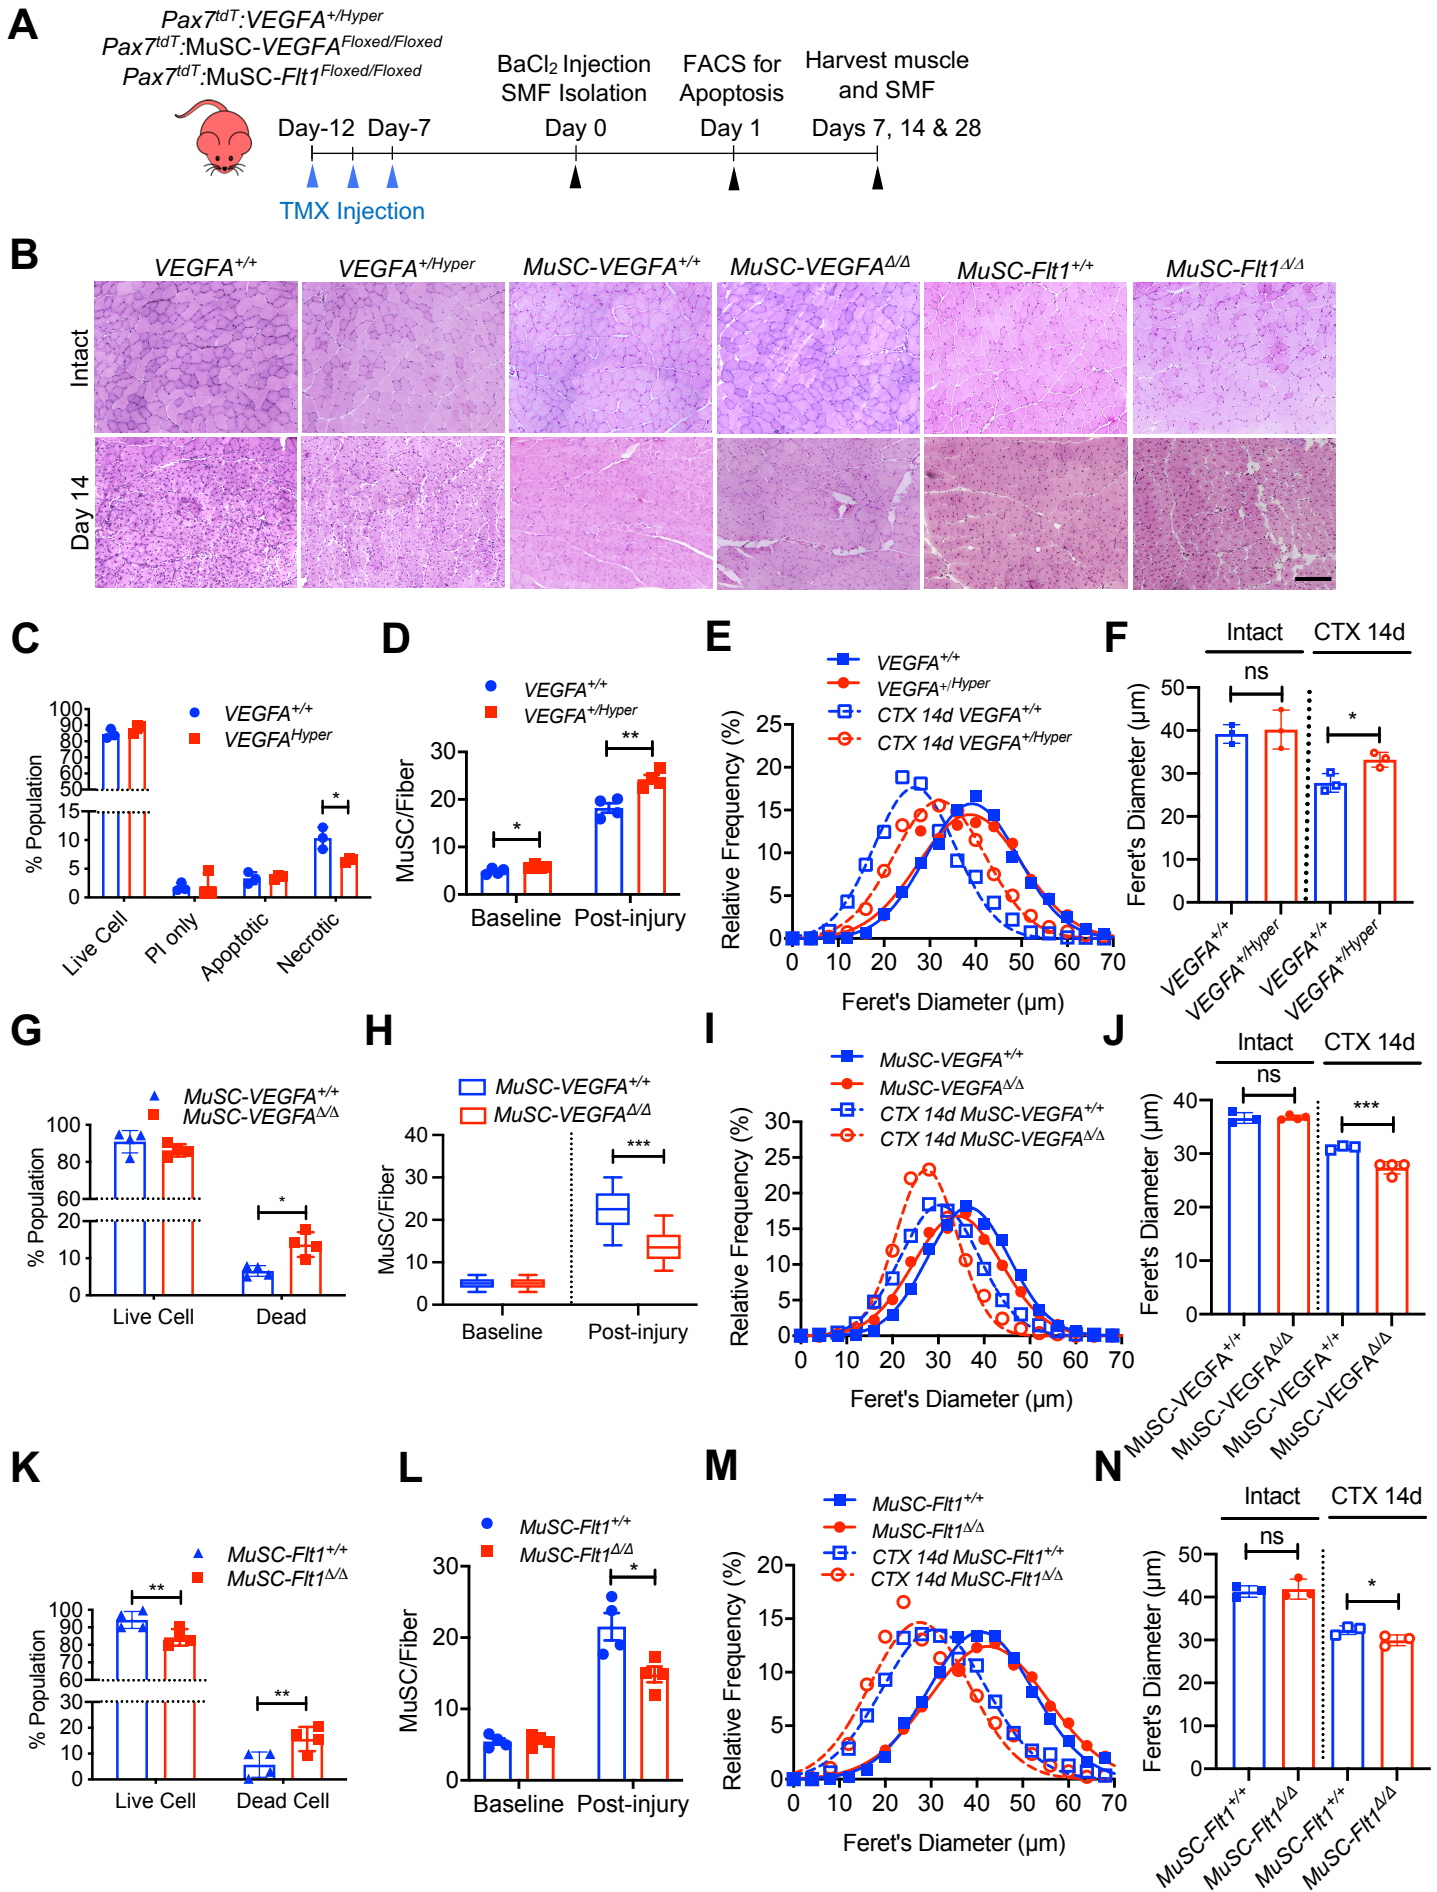

## Figure 4

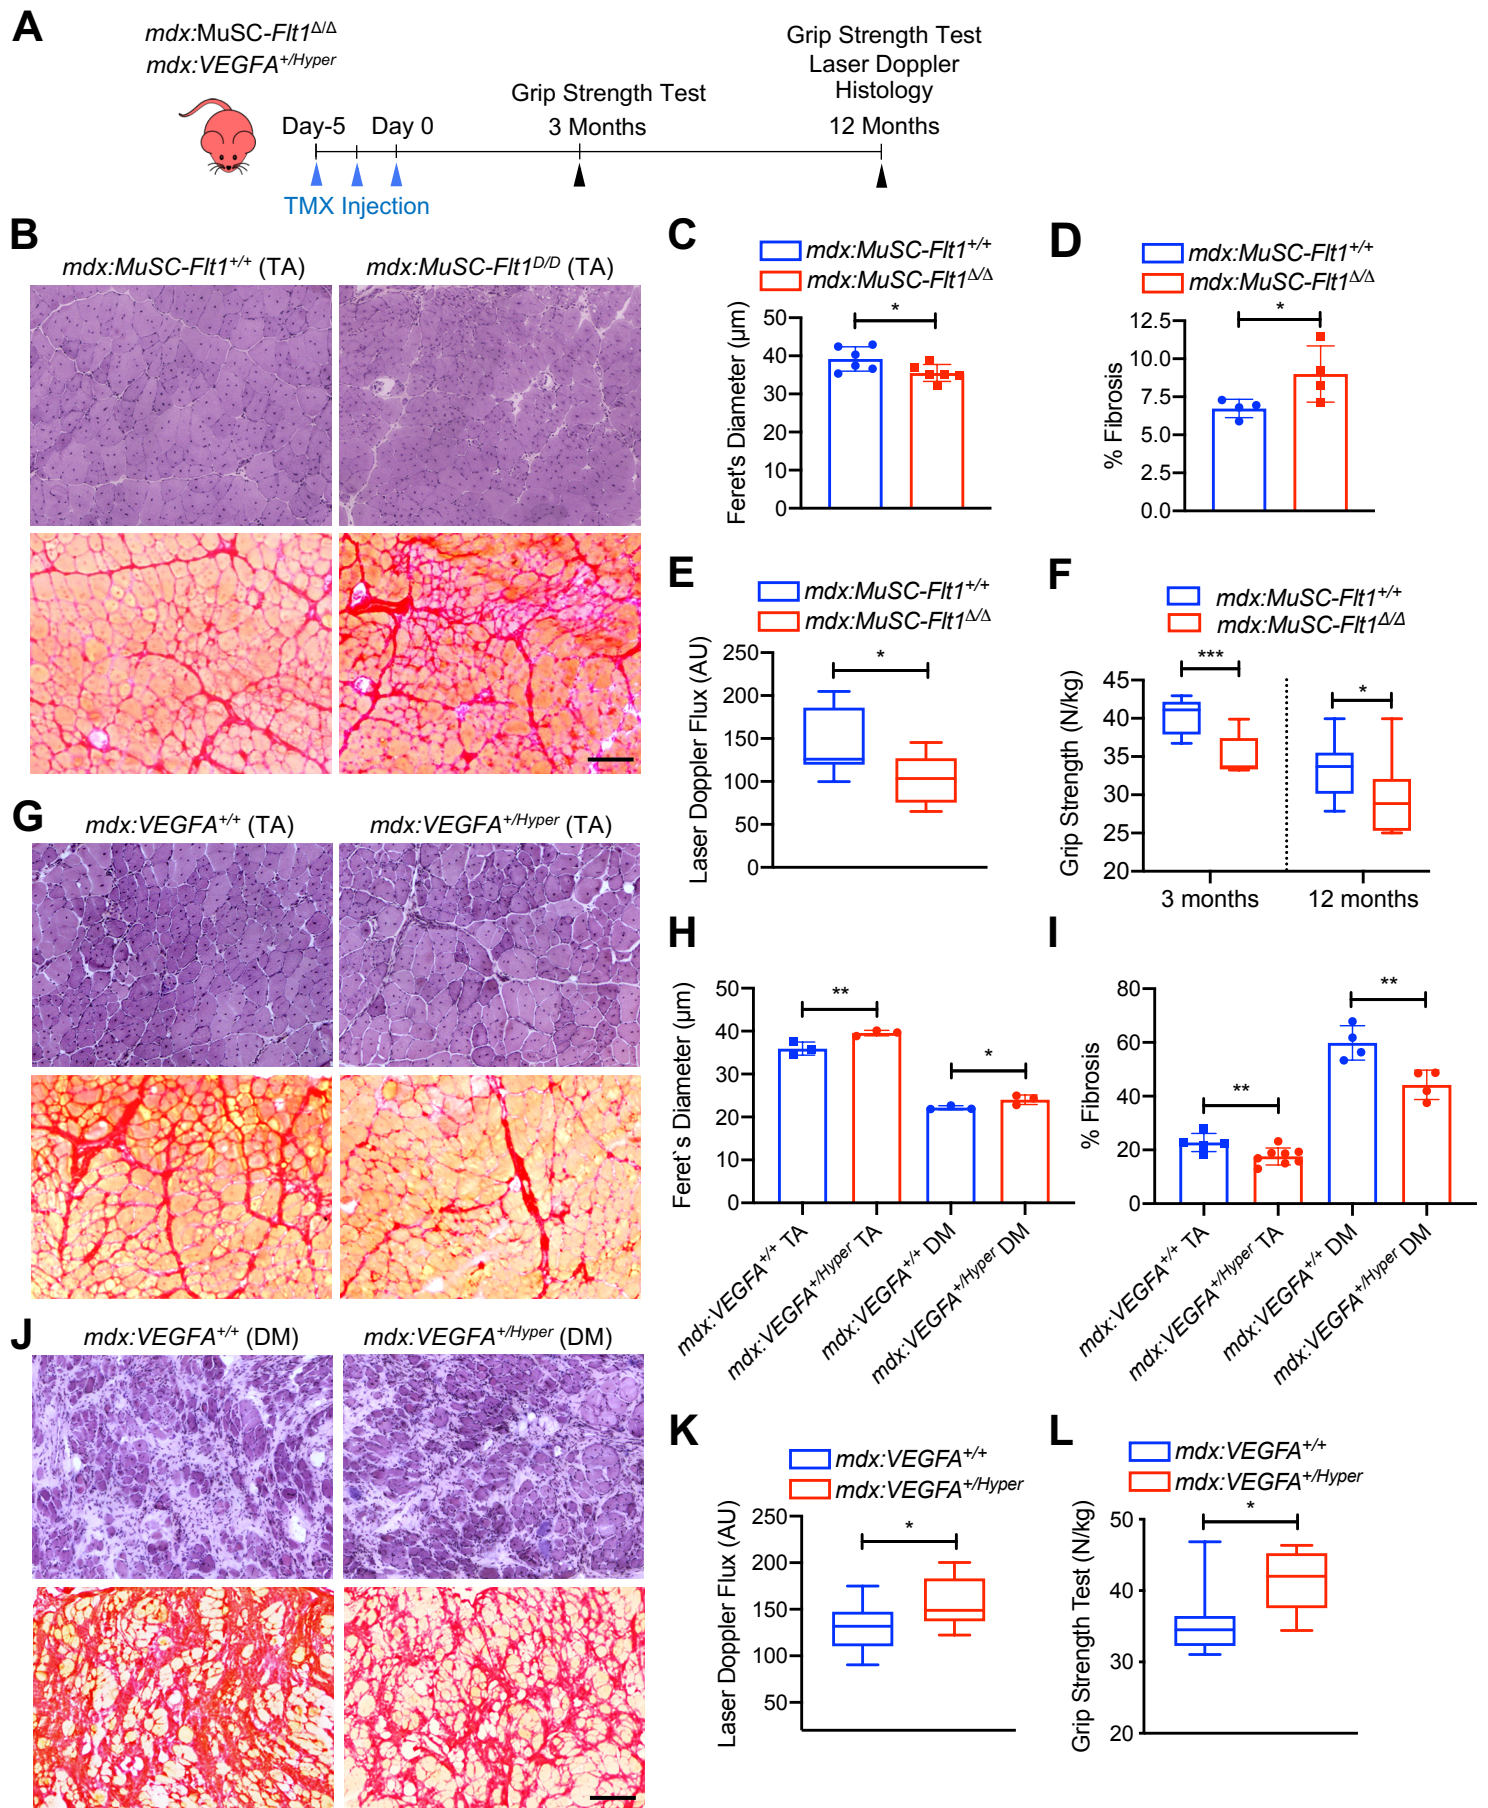

Source: https://www.biorxiv.org/content/biorxiv/early/2021/09/03/2021.08.28.458037.full.pdf
